# Supplementary material for: Comparing Four Question Formats in Five Languages for On-Line Consumer Surveys
Source: MDPI journal article supplement (doi:10.3390/mps3030049), 2020-07-14
Supplement: s1 [file s1]

## Demographics

---

D1. 您的性别是？

- 男性
  - 女性
- 

D2. 您是在哪一年出生的？

- 1943 及以前
  - 1944 - 1964
  - 1965 -1979
  - 1980 - 1994
  - 1995 - 2001
  - 2002 及以后
- 

D3. 您的学历是

- 小学及以下
  - 高中
  - 大学、研究生及以上
- 

D4. 包括您自己，您家里一共有几位？

- 1
- 2

- 3
  - 4
  - 5个或者超过5个
- 

**D5.** 你家里有几位小于18岁的家庭成员？

- 0
  - 1
  - 2
  - 3
  - 4个或者超过4个
- 

**QC.**

为了保证调查数据的质量，我们希望能够获得您最准确的意见，所以对每一个问题的谨慎回答进而提供最好的答案对我们很重要。

您可以承诺为本次调查中的问题提供具体和诚实的答案吗？

- 我会提供我最好的答案
  - 我不会提供最好的答案
  - 我不能保证能否提供最好的答案
- 

## Food Involvement

---

**INTRO.** 接下来，您将完成一个有关食品行为的调查问卷。

请根据您的对如下表述的认同程度回答下面的问题：

---

**Q1.** 我每天不太去想关于食物的事

- 极度不同意
  - 不同意
  - 有一点不同意
  - 不同意也不反对
  - 有一点同意
  - 同意
  - 极度同意
- 

Q2. 做饭并不是很有趣

- 极度不同意
  - 不同意
  - 有一点不同意
  - 不同意也不反对
  - 有一点同意
  - 同意
  - 极度同意
- 

Q3. 我喜欢谈论我吃了什么或者要吃什么

- 极度不同意
  - 不同意
  - 有一点不同意
  - 不同意也不反对
  - 有一点同意
  - 同意
  - 极度同意
- 

Q4. 相对于其他每天要做的决定来说，选择吃什么这件事对我来说并不是那么重要

- 极度不同意
  - 不同意
  - 有一点不同意
  - 不同意也不反对
  - 有一点同意
  - 同意
  - 极度同意
- 

Q5. 我旅游时，最期待的事情之一就是吃当地的食物

- 极度不同意
  - 不同意
  - 有一点不同意
  - 不同意也不反对
  - 有一点同意
  - 同意
  - 极度同意
- 

Q6. 吃饭后我做大部分或者全部的清洁工作

- 极度不同意
  - 不同意
  - 有一点不同意
  - 不同意也不反对
  - 有一点同意
  - 同意
  - 极度同意
- 

Q7. 我喜欢为别人或自己做饭

- 极度不同意
  - 不同意
  - 有一点不同意
  - 不同意也不反对
  - 有一点同意
  - 同意
  - 极度同意
- 

Q8. 出去吃饭时，我不思考或者谈论我的食物味道怎么样

- 极度不同意
  - 不同意
  - 有一点不同意
  - 不同意也不反对
  - 有一点同意
  - 同意
  - 极度同意
- 

Q9. 我不喜欢混合或切碎了的的食物

- 极度不同意
  - 不同意
  - 有一点不同意
  - 不同意也不反对
  - 有一点同意
  - 同意
  - 极度同意
- 

Q10. 我为自己购买大部分或全部的食物

- 极度不同意
  - 不同意
  - 有一点不同意
  - 不同意也不反对
  - 有一点同意
  - 同意
  - 极度同意
- 

Q11. 我不洗碗或者清理餐桌

- 极度不同意
  - 不同意
  - 有一点不同意
  - 不同意也不反对
  - 有一点同意
  - 同意
  - 极度同意
- 

Q12. 我在乎饭桌有没有整齐地整理好

- 极度不同意
  - 不同意
  - 有一点不同意
  - 不同意也不反对
  - 有一点同意
  - 同意
  - 极度同意
- 

## Health and Taste Attitude

---

**Q13. 我很在乎食物是否健康**

- 极度不同意
  - 不同意
  - 有一点不同意
  - 不同意也不反对
  - 有一点同意
  - 同意
  - 极度同意
- 

**Q14. 我总是追随一个健康平衡的饮食**

- 极度不同意
  - 不同意
  - 有一点不同意
  - 不同意也不反对
  - 有一点同意
  - 同意
  - 极度同意
- 

**Q15. 低脂对我很重要**

- 极度不同意
  - 不同意
  - 有一点不同意
  - 不同意也不反对
  - 有一点同意
  - 同意
  - 极度同意
-

Q16. 高维他命和高矿物质含量对我每日饮食很重要

- 极度不同意
  - 不同意
  - 有一点不同意
  - 不同意也不反对
  - 有一点同意
  - 同意
  - 极度同意
- 

Q17. 我吃我喜欢的，我不担心食物健不健康

- 极度不同意
  - 不同意
  - 有一点不同意
  - 不同意也不反对
  - 有一点同意
  - 同意
  - 极度同意
- 

Q18. 我不回避任何食物，即使他会使我的胆固醇升高

- 极度不同意
  - 不同意
  - 有一点不同意
  - 不同意也不反对
  - 有一点同意
  - 同意
  - 极度同意
-



Q19. 食物的健康与否对我选择食物有很小的影响

- 极度不同意
  - 不同意
  - 有一点不同意
  - 不同意也不反对
  - 有一点同意
  - 同意
  - 极度同意
- 

Q20. 零食的健康与否对我来说都一样

- 极度不同意
  - 不同意
  - 有一点不同意
  - 不同意也不反对
  - 有一点同意
  - 同意
  - 极度同意
- 

Q21. 我不相信食物总是快乐的来源

- 极度不同意
  - 不同意
  - 有一点不同意
  - 不同意也不反对
  - 有一点同意
  - 同意
  - 极度同意
-

Q22. 食物的外观对我来说无所谓

- 极度不同意
  - 不同意
  - 有一点不同意
  - 不同意也不反对
  - 有一点同意
  - 同意
  - 极度同意
- 

Q23. 对我来说，不管是周末还是非周末，吃好吃的食物都是一件很重要的事

- 极度不同意
  - 不同意
  - 有一点不同意
  - 不同意也不反对
  - 有一点同意
  - 同意
  - 极度同意
- 

Q24. 我吃饭时专注于享受食物的味道

- 极度不同意
  - 不同意
  - 有一点不同意
  - 不同意也不反对
  - 有一点同意
  - 同意
  - 极度同意
-

Q25. 即便我不喜欢食物的味道我也会把我的食物吃完

- 极度不同意
  - 不同意
  - 有一点不同意
  - 不同意也不反对
  - 有一点同意
  - 同意
  - 极度同意
- 

Q26. 周末的一个重要部分就是吃美味的食物

- 极度不同意
  - 不同意
  - 有一点不同意
  - 不同意也不反对
  - 有一点同意
  - 同意
  - 极度同意
- 

## Neophobia

---

Q27. 我不断去尝试新的和不同的食物

- 极度不同意
- 不同意
- 有一点不同意
- 不同意也不反对
- 有一点同意
- 同意

极度同意

---

Q28. 我不信任新的没有见过的事物

- 极度不同意
  - 不同意
  - 有一点不同意
  - 不同意也不反对
  - 有一点同意
  - 同意
  - 极度同意
- 

Q29. 如果我不知道食物里有什么，我不会尝试

- 极度不同意
  - 不同意
  - 有一点不同意
  - 不同意也不反对
  - 有一点同意
  - 同意
  - 极度同意
- 

Q30. 我喜欢不同国家的食物

- 极度不同意
- 不同意
- 有一点不同意
- 不同意也不反对
- 有一点同意
- 同意

极度同意

---

Q31. 不同民族的食物看起来太奇怪了以至于无法尝试

- 极度不同意
  - 不同意
  - 有一点不同意
  - 不同意也不反对
  - 有一点同意
  - 同意
  - 极度同意
- 

Q32. 在聚会时我会去尝试一个新食物

- 极度不同意
  - 不同意
  - 有一点不同意
  - 不同意也不反对
  - 有一点同意
  - 同意
  - 极度同意
- 

Q33. 我害怕尝试没吃过的食物

- 极度不同意
- 不同意
- 有一点不同意
- 不同意也不反对
- 有一点同意
- 同意

极度同意

---

Q34. 我对我的食物很挑剔

- 极度不同意
- 不同意
- 有一点不同意
- 不同意也不反对
- 有一点同意
- 同意
- 极度同意
- 

Q35. 我几乎什么都吃

- 极度不同意
- 不同意
- 有一点不同意
- 不同意也不反对
- 有一点同意
- 同意
- 极度同意
- 

Q36. 我喜欢尝试新的不同民族风味的饭店

- 极度不同意
- 不同意
- 有一点不同意
- 不同意也不反对
- 有一点同意
- 同意

极度同意

---

## Reasons for Starchy food choices(CATA)

---

Q84.

您吃白米饭吗？

- 是的，我吃
- 不是，我不吃
- 

Q99.

请告诉我们您吃白米饭的原因（请选择所有适用的选项）

- ... 因为它让我在别人面前看起来很好
- ... 因为我喜欢它
- ... 因为吃它让我很享受
- ... 为了奖励自己
- ... 因为我关注我的体重
- ... 因为我很沮丧
- ... 因为它使社交聚会更加舒适
- ... 保持均衡饮食
- ... 因为我熟悉它
- ... 因为不吃它会不礼貌
- ... 因为我对它有食欲
- ... 因为它很健康
- ... 因为它最方便
- ... 因为我应该吃它
- ... 因为其他人喜欢它
- ... 因为它的味道很好
- ... 因为它很容易准备
- ... 因为脂肪含量低

- ... 因为我需要能量
- ... 因为它准备起来很快
- ... 因为它是天然的 ( 例如没有经过基因改造 )
- ... 因为我很伤心
- ... 因为我饿了
- ... 为了纵容自己
- ... 因为它很新潮
- ... 因为它的卡路里很低
- ... 因为它不含有害物质 ( 例如杀虫剂 , 污染物 , 抗生素 )
- ... 因为我习惯吃它
- ... 这样我就可以和其他人共度时光
- ... 因为我不想再花更多的钱
- ... 因为我从广告或在电视上看过它
- ... 因为我经常吃它
- ... 因为我想每天都吃它
- ... 避免让那些试图让我开心的人失望
- ... 因为它能令我感到愉悦的饱腹感
- ... 因为它帮助我社交
- ... 因为它适用于特定场合
- ... 因为这是唯一的选择
- ... 因为它的呈现方式很有吸引力 ( 例如包装 )
- ... 因为它自然而然地吸引了我 ( 吸引人的颜色 )
- ... 因为它打折
- ... 因为我从小吃到大
- ... 出于传统 ( 例如家庭传统 , 特殊场合 )
- ... 因为它是有机
- ... 因为它让我保持身材
- ... 因为我感到孤独
- ... 因为它的价格不贵



**Q88.** 请告诉我们您不吃白米饭的原因（请选择所有适用的选项）

- 我不应该吃它
- 它的分量大小不合适
- 我不经常吃它
- 有其他人在的时候我不吃它
- 价格太高
- 它不适用于特定场合
- 我不喜欢它看起来的样子
- 它不方便
- 我不想纵容自己
- 吃它显得我很土
- 我不认为它是一种零食
- 我不喜欢它
- 我最近刚吃过， 我不想太经常吃同样的东西
- 它不是有机的
- 它不健康
- 我绝不选它。 我喜欢每天吃一样的食物
- 它不足以填饱肚子
- 这个食物让我感到伤心、孤单或沮丧
- 它卡路里太高
- 它不是我在那个时刻想吃的东西

---

## Reasons for Protein foods Choices(CATA)

---

**Q168.**

您吃红烧肉吗？

- 是的， 我吃
- 不是， 我不吃

**Q169.**

请告诉我们您吃红烧肉的原因（请选择所有适用的选项）

- ... 因为它的卡路里很低
- ...因为我饿了
- ... 因为我关注我的体重
- ... 因为这是唯一的选择
- ... 因为它很新潮
- ... 因为它适用于特定场合
- ... 因为它很健康
- ... 因为我从广告或在电视上看过它
- ... 因为它是天然的（例如没有经过基因改造）
- ... 因为我应该吃它
- ... 因为它的呈现方式很有吸引力（例如包装）
- ... 因为它让我在别人面前看起来很好
- ... 因为我想每天都吃它
- ... 因为它能令我感到愉悦的饱腹感
- ... 因为它打折
- ... 因为我感到孤独
- ... 因为我不想再花更多的钱
- ... 因为它不含有害物质（例如杀虫剂，污染物，抗生素）
- ... 因为它使社交聚会更加舒适
- ... 因为它的价格不贵
- ... 因为我对它有食欲
- ... 因为它是有机
- ... 避免让那些试图让我开心的人失望
- ... 因为它的味道很好
- ... 因为我熟悉它
- ... 这样我就可以和其他人共度时光
- ... 保持均衡饮食
- ... 为了纵容自己

- ... 因为我很伤心
  - ... 因为其他人喜欢它
  - ... 因为我从小吃到大
  - ... 因为脂肪含量低
  - ... 因为吃它让我很享受
  - ... 为了奖励自己
  - ... 出于传统 ( 例如家庭传统 , 特殊场合 )
  - ... 因为我经常吃它
  - ... 因为它很容易准备
  - ... 因为它自然而然地吸引了我 ( 吸引人的颜色 )
  - ... 因为我需要能量
  - ... 因为它帮助我社交
  - ... 因为它让我保持身材
  - ... 因为不吃它会不礼貌
  - ... 因为它准备起来很快
  - ... 因为我习惯吃它
  - ... 因为我喜欢它
  - ... 因为我很沮丧
  - ... 因为它最方便
- 

**Q170.** 请告诉我们您不吃红烧肉的原因 ( 请选择所有适用的选项 )

- 它不足以填饱肚子
- 我最近刚吃过 , 我不想太经常吃同样的东西
- 它不适用于特定场合
- 我不应该吃它
- 它的分量大小不合适
- 它卡路里太高
- 我绝不选它。 我喜欢每天吃一样的食物
- 有其他人在的时候我不吃它

- 我不经常吃它
  - 这个食物让我感到伤心、孤单或沮丧
  - 我不认为它是一种零食
  - 吃它显得我很土
  - 我不喜欢它
  - 它不是有机的
  - 它不是我在那个时刻想吃的东西
  - 价格太高
  - 我不想纵容自己
  - 它不健康
  - 我不喜欢它看起来的样子
  - 它不方便
- 

## Reasons for Dairy Food Choices(CATA)

---

Q171.

您吃豆浆吗？

- 是的，我吃
  - 不是，我不吃
- 

Q172.

请告诉我们您吃豆浆的原因（请选择所有适用的选项）

- ... 因为我对它有食欲
- ... 因为它打折
- ... 因为我熟悉它
- ... 因为它最方便
- ... 因为它的味道很好
- ... 因为脂肪含量低
- ... 因为它不含有害物质（例如杀虫剂，污染物，抗生素）

- ... 因为它很健康
- ... 因为我想每天都吃它
- ... 因为我很伤心
- ... 这样我就可以和其他人共度时光
- ... 因为其他人喜欢它
- ... 因为我习惯吃它
- ... 因为这是唯一的选择
- ... 因为我关注我的体重
- ... 因为它的卡路里很低
- ... 因为我从小吃到大
- ... 因为我应该吃它
- ... 因为我不想再花更多的钱
- ... 因为它帮助我社交
- ... 因为吃它让我很享受
- ... 因为它使社交聚会更加舒适
- ... 因为不吃它会不礼貌
- ... 保持均衡饮食
- ... 出于传统 ( 例如家庭传统 , 特殊场合 )
- ... 因为我喜欢它
- ... 因为我经常吃它
- ... 因为它让我保持身材
- ... 因为它是天然的 ( 例如没有经过基因改造 )
- ... 因为我很沮丧
- ... 因为它很容易准备
- ... 因为它的价格不贵
- ... 因为它的呈现方式很有吸引力 ( 例如包装 )
- ... 避免让那些试图让我开心的人失望
- ... 因为我需要能量
- ... 因为它适用于特定场合
- ... 因为我饿了

- ... 为了奖励自己
  - ... 为了纵容自己
  - ... 因为它自然而然地吸引了我（吸引人的颜色）
  - ... 因为它让我在别人面前看起来很好
  - ... 因为它是机器的
  - ... 因为我感到孤独
  - ... 因为它准备起来很快
  - ... 因为我从广告或在电视上看过它
  - ... 因为它很新潮
  - ... 因为它能令我感到愉悦的饱腹感
- 

**Q173.** 请告诉我们您不吃豆浆的原因（请选择所有适用的选项）

- 它不是我在那个时刻想吃的东西
- 它卡路里太高
- 它不健康
- 我不认为它是一种零食
- 它不方便
- 我不喜欢它看起来的样子
- 吃它显得我很土
- 它不是机器的
- 我最近刚吃过，我不想太经常吃同样的东西
- 价格太高
- 它不足以填饱肚子
- 它不适用于特定场合
- 我不喜欢它
- 有其他人在的时候我不吃它
- 我不经常吃它
- 这个食物让我感到伤心、孤单或沮丧
- 我不应该吃它

- 它的分量大小不合适
  - 我不想纵容自己
  - 我绝不选它。我喜欢每天吃一样的食物
- 

## Reasons for Fruit Choices(CATA)

---

Q174.

您吃香蕉吗？

- 是的，我吃
  - 不是，我不吃
- 

Q175.

请告诉我们您吃香蕉的原因（请选择所有适用的选项）

- ... 因为它的呈现方式很有吸引力（例如包装）
- ... 因为这是唯一的选择
- ... 因为我经常吃它
- ... 因为它准备起来很快
- ... 因为脂肪含量低
- ... 因为它的味道很好
- ... 这样我就可以和其他人共度时光
- ... 因为它不含有害物质（例如杀虫剂，污染物，抗生素）
- ... 因为它让我保持身材
- ... 因为它很容易准备
- ... 因为我很伤心
- ... 因为它让我在别人面前看起来很好
- ... 因为我从广告或在电视上看过它
- ... 为了奖励自己
- ...因为我饿了
- ... 因为我想每天都吃它

- ... 因为它使社交聚会更加舒适
- ... 避免让那些试图让我开心的人失望
- ... 因为它自然而然地吸引了我 ( 吸引人的颜色 )
- ... 为了纵容自己
- ... 因为不吃它会不礼貌
- ... 因为我喜欢它
- ... 因为它适用于特定场合
- ... 出于传统 ( 例如家庭传统 · 特殊场合 )
- ... 因为其他人喜欢它
- ... 因为我从小吃到大
- ... 因为我需要能量
- ... 因为它能令我感到愉悦的饱腹感
- ... 因为我很沮丧
- ... 因为我习惯吃它
- ... 因为它的价格不贵
- ... 因为我感到孤独
- ... 因为它打折
- ... 因为它的卡路里很低
- ... 因为我对它有食欲
- ... 因为我熟悉它
- ... 因为我关注我的体重
- ... 因为它是有机
- ... 因为它最方便
- ... 因为它是天然的 ( 例如没有经过基因改造 )
- ... 因为我不想再花更多的钱
- ... 因为吃它让我很享受
- ... 因为它帮助我社交
- ... 保持均衡饮食
- ... 因为它很健康
- ... 因为它很新潮



... 因为我应该吃它

---

**Q176.** 请告诉我们您不吃香蕉的原因（请选择所有适用的选项）

- 我最近刚吃过，我不想太经常吃同样的东西
  - 它的分量大小不合适
  - 这个食物让我感到伤心、孤单或沮丧
  - 它不是我在那个时刻想吃的东西
  - 它不方便
  - 它不适用于特定场合
  - 价格太高
  - 我不应该吃它
  - 它不是有机的
  - 我不喜欢它
  - 有其他人在的时候我不吃它
  - 我不想纵容自己
  - 我绝不选它。我喜欢每天吃一样的食物
  - 它卡路里太高
  - 它不健康
  - 它不足以填饱肚子
  - 我不喜欢它看起来的样子
  - 我不认为它是一种零食
  - 吃它显得我很土
  - 我不经常吃它
- 

## Reasons for Sweet food Choices(CATA)

---

**Q177.**

您吃麻球吗？

- 是的，我吃
- 不是，我不吃
- 

**Q178.**

请告诉我们您吃麻球的原因（请选择所有适用的选项）

- ... 因为我很沮丧
- ... 因为我对它有食欲
- ... 因为我关注我的体重
- ... 因为我想每天都吃它
- ... 因为它打折
- ... 因为我应该吃它
- ... 因为我习惯吃它
- ... 保持均衡饮食
- ... 因为我感到孤独
- ... 因为它很新潮
- ... 因为我从小吃到大
- ... 因为它的卡路里很低
- ... 因为我饿了
- ... 因为它不含有害物质（例如杀虫剂，污染物，抗生素）
- ... 因为它让我保持身材
- ... 出于传统（例如家庭传统，特殊场合）
- ... 因为它适用于特定场合
- ... 因为我经常吃它
- ... 因为它是机器的
- ... 因为我需要能量
- ... 因为我熟悉它
- ... 因为它能令我感到愉悦的饱腹感
- ... 因为它准备起来很快
- ... 为了纵容自己
- ... 因为它最方便

- ... 因为我从广告或在电视上看过它
- ... 避免让那些试图让我开心的人失望
- ... 因为它自然而然地吸引了我（吸引人的颜色）
- ... 因为它的呈现方式很有吸引力（例如包装）
- ... 因为脂肪含量低
- ... 这样我就可以和其他人共度时光
- ... 因为它使社交聚会更加舒适
- ... 为了奖励自己
- ... 因为它让我在别人面前看起来很好
- ... 因为我很伤心
- ... 因为我喜欢它
- ... 因为其他人喜欢它
- ... 因为我不想再花更多的钱
- ... 因为不吃它会不礼貌
- ... 因为它帮助我社交
- ... 因为这是唯一的选择
- ... 因为它的价格不贵
- ... 因为它是天然的（例如没有经过基因改造）
- ... 因为它的味道很好
- ... 因为它很健康
- ... 因为吃它让我很享受
- ... 因为它很容易准备

---

**Q179.** 请告诉我们您不吃麻球的原因（请选择所有适用的选项）

- 吃它显得我很土
- 它不健康
- 我不经常吃它
- 我不应该吃它
- 它的分量大小不合适

- 我最近刚吃过， 我不想太经常吃同样的东西
  - 我不喜欢它
  - 它不是有机的
  - 价格太高
  - 它不方便
  - 这个食物让我感到伤心、孤单或沮丧
  - 我绝不选它。 我喜欢每天吃一样的食物
  - 我不想纵容自己
  - 它不适用于特定场合
  - 它不足以填饱肚子
  - 我不认为它是一种零食
  - 有其他人存在的时候我不吃它
  - 我不喜欢它看起来的样子
  - 它不是我在那个时刻想吃的东西
  - 它卡路里太高
- 

## JAR & Liking

---

Q60.

您认为本问卷的长度如何？

- 过短
  - 太短
  - 有点短
  - 适中
  - 有点长
  - 太长
  - 过长
- 

Q62.

您对于填写完这份问卷有什么感觉？

- 我非常喜欢
  - 我喜欢
  - 我没有特别的感受
  - 我不喜欢
  - 我非常不喜欢
- 

## Reasons for Starchy food choices(Full CATA)

---

Q225.

您吃白米饭吗？

- 是的，我吃
  - 不是，我不吃
- 

Q226. 您吃白米饭是因为您习惯吃它吗？

- 是
  - 不是
- 

Q227. 您吃白米饭是因为它很健康吗？

- 是
  - 不是
- 

Q228. 您吃白米饭是因为它准备起来很快吗？

- 是
- 不是

---

**Q229.** 您吃白米饭是因为它的味道很好吗?

- 是
- 不是
- 

**Q230.** 您吃白米饭是为了纵容自己吗?

- 是
- 不是
- 

**Q231.** 您吃白米饭是因为它是天然的吗 ( 例如没有经过基因改造的 ) ?

- 是
- 不是
- 

**Q232.** 您吃白米饭是因为您不想再花更多的钱吗?

- 是
- 不是
- 

**Q233.** 您吃白米饭是因为它的卡路里很低吗?

- 是
- 不是
- 

**Q234.** 您吃白米饭是因为您很沮丧吗?

- 是
- 不是
-

**Q235.** 您吃白米饭是因为它让您在别人面前看起来很好吗？

- 是
- 不是
- 

**Q236.** 您吃白米饭是因为不吃它会不礼貌吗？

- 是
- 不是
- 

**Q237.** 您吃白米饭是因为它的呈现方式很有吸引力吗（例如包装）？

- 是
- 不是
- 

**Q238.** 您吃白米饭是因为它能让您和其他人共度时光吗？

- 是
- 不是
- 

**Q239.** 您吃白米饭是因为它是有机的是吗？

- 是
- 不是
- 

**Q240.** 您吃白米饭是因为您从小一直吃它长大吗？

- 是
- 不是
-

Q241. 您吃白米饭是因为吃它让您很享受吗?

- 是
- 不是
- 

Q242. 您吃白米饭是因为您饿了吗?

- 是
- 不是
- 

Q243. 您吃白米饭是因为您经常吃它吗?

- 是
- 不是
- 

Q244. 您吃白米饭是因为您对它有食欲吗?

- 是
- 不是
- 

Q245. 您吃白米饭是因为它很容易准备吗?

- 是
- 不是
- 

Q246. 您吃白米饭是因为您很伤心吗?

- 是
- 不是
-



Q247. 您吃白米饭是因为它的脂肪含量低吗?

- 是
- 不是
- 

Q248. 您吃白米饭是因为您从广告或电视上看到过它吗?

- 是
- 不是
- 

Q249. 您吃白米饭是因为它能使社交聚会更加舒适吗?

- 是
- 不是
- 

Q250. 您吃白米饭是因为您应该吃它吗?

- 是
- 不是
- 

Q251. 您吃白米饭是因为其他人喜欢它吗?

- 是
- 不是
- 

Q252. 您吃白米饭是因为您感到孤独吗?

- 是
- 不是
-

Q253. 您吃白米饭是因为您关注您的体重吗?

- 是
- 不是
- 

Q254. 您吃白米饭是因为它不含有害物质吗 ( 例如杀虫剂、污染物、抗生素 ) ?

- 是
- 不是
- 

Q255. 您吃白米饭是因为它最方便吗?

- 是
- 不是
- 

Q256. 您吃白米饭是因为您需要能量吗?

- 是
- 不是
- 

Q257. 您吃白米饭是因为您对它熟悉吗?

- 是
- 不是
- 

Q258. 您吃白米饭是因为您喜欢它吗?

- 是
- 不是
-

**Q259.** 您吃白米饭是因为它能让您感到愉悦的饱腹感吗?

- 是
- 不是
- 

**Q260.** 您吃白米饭是为了奖励自己吗?

- 是
- 不是
- 

**Q261.** 您吃白米饭是出于传统吗 ( 例如家庭传统、特殊场合 ) ?

- 是
- 不是
- 

**Q262.** 您吃白米饭是因为它适用于特定场合吗?

- 是
- 不是
- 

**Q263.** 您吃白米饭是为了保持均衡饮食吗?

- 是
- 不是
- 

**Q264.** 您吃白米饭是因为它帮助您社交吗?

- 是
- 不是
-

Q265. 您吃白米饭是因为它的价格不贵吗?

- 是
- 不是
- 

Q266. 您吃白米饭是因为它自然而然地吸引了您吗 (例如它的颜色吸引了您)?

- 是
- 不是
- 

Q267. 您吃白米饭是因为您不想使试图让你开心的人失望吗?

- 是
- 不是
- 

Q268. 您吃白米饭是因为它很新潮吗?

- 是
- 不是
- 

Q269. 您吃白米饭是因为它打折吗?

- 是
- 不是
- 

Q270. 您吃白米饭是因为它能让你保持身材吗?

- 是
- 不是
-

Q271. 您吃白米饭是因为它是您的唯一选择吗？

- 是
- 不是
- 

Q272. 您吃白米饭是因为您每天都想吃它吗？

- 是
- 不是
- 

Q273. 您不吃白米饭是因为您不认为它是一种零食吗？

- 是
- 不是
- 

Q274. 您不吃白米饭是因为您不喜欢它吗？

- 是
- 不是
- 

Q275. 您不吃白米饭是因为您不经常吃它吗？

- 是
- 不是
- 

Q276. 您不吃白米饭是因为它的分量大小不合适吗？

- 是
- 不是
-

Q277. 您不吃白米饭是因为它不足以填饱肚子吗?

- 是
- 不是
- 

Q278. 您不吃白米饭是因为它不健康吗?

- 是
- 不是
- 

Q279. 您不吃白米饭是因为它不方便吗?

- 是
- 不是
- 

Q280. 您不吃白米饭是因为您不想纵容自己吗?

- 是
- 不是
- 

Q281. 您不吃白米饭是因为它不适用于特定场合吗?

- 是
- 不是
- 

Q282. 您不吃白米饭是因为有其他人在的时候您不吃它吗?

- 是
- 不是
-

Q283. 您不吃白米饭是因为它的价格太高吗?

- 是
- 不是
- 

Q284. 您不吃白米饭是因为您不喜欢它看起来的样子吗?

- 是
- 不是
- 

Q285. 您不吃白米饭是因为它的卡路里太高吗?

- 是
- 不是
- 

Q286. 您不吃白米饭是因为您不应该吃吗 ( 例如出于文化、宗教习俗 ) ?

- 是
- 不是
- 

Q287. 您不吃白米饭是因为您觉得吃它显得您很土吗?

- 是
- 不是
- 

Q288. 您不吃白米饭是因为它不是您在那个时候想吃的东西吗?

- 是
- 不是
-

**Q289.** 您不吃白米饭是因为最近您刚吃过它，您不想太经常吃同样的东西吗？

- 是
- 不是
- 

**Q290.** 您不吃白米饭是因为您每天喜欢吃一样的食物吗（不包括白米饭的其他食物）？

- 是
- 不是
- 

**Q291.** 您不吃白米饭是因为这个食物让您感到伤心、孤单或沮丧吗？

- 是
- 不是
- 

**Q292.** 您不吃白米饭是因为它不是有机的吗？

- 是
- 不是
- 

## Reasons for Protein foods Choices(Full CATA)

---

**Q293.**

您吃红烧肉吗？

- 是的，我吃
- 不是，我不吃
- 

**Q294.** 您吃红烧肉是因为您习惯吃它吗？



- 是
- 不是
- 

**Q295.** 您吃红烧肉是因为它很健康吗？

- 是
- 不是
- 

**Q296.** 您吃红烧肉是因为它准备起来很快吗？

- 是
- 不是
- 

**Q297.** 您吃红烧肉是因为它的味道很好吗？

- 是
- 不是
- 

**Q298.** 您吃红烧肉是为了纵容自己吗？

- 是
- 不是
- 

**Q299.** 您吃红烧肉是因为它是天然的吗（例如没有经过基因改造的）？

- 是
- 不是
- 

**Q300.** 您吃红烧肉是因为您不想再花更多的钱吗？

- 是
- 不是
- 

**Q301.** 您吃红烧肉是因为它的卡路里很低吗？

- 是
- 不是
- 

**Q302.** 您吃红烧肉是因为您很沮丧吗？

- 是
- 不是
- 

**Q303.** 您吃红烧肉是因为它让您在别人面前看起来很好吗？

- 是
- 不是
- 

**Q304.** 您吃红烧肉是因为不吃它会不礼貌吗？

- 是
- 不是
- 

**Q305.** 您吃红烧肉是因为它的呈现方式很有吸引力吗（例如包装）？

- 是
- 不是
- 

**Q306.** 您吃红烧肉是因为它能让您和其他人共度时光吗？

- 是
- 不是
- 

**Q307.** 您吃红烧肉是因为它是有机吗?

- 是
- 不是
- 

**Q308.** 您吃红烧肉是因为您从小一直吃它长大吗?

- 是
- 不是
- 

**Q309.** 您吃红烧肉是因为吃它让您很享受吗?

- 是
- 不是
- 

**Q310.** 您吃红烧肉是因为您饿了吗?

- 是
- 不是
- 

**Q311.** 您吃红烧肉是因为您经常吃它吗?

- 是
- 不是
- 

**Q312.** 您吃红烧肉是因为您对它有食欲吗?

- 是
- 不是
- 

**Q313.** 您吃红烧肉是因为它很容易准备吗?

- 是
- 不是
- 

**Q314.** 您吃红烧肉是因为您很伤心吗?

- 是
- 不是
- 

**Q315.** 您吃红烧肉是因为它的脂肪含量低吗?

- 是
- 不是
- 

**Q316.** 您吃红烧肉是因为您从广告或电视上看到过它吗?

- 是
- 不是
- 

**Q317.** 您吃红烧肉是因为它能使社交聚会更加舒适吗?

- 是
- 不是
- 

**Q318.** 您吃红烧肉是因为您应该吃它吗?

- 是
- 不是
- 

**Q319.** 您吃红烧肉是因为其他人喜欢它吗?

- 是
- 不是
- 

**Q320.** 您吃红烧肉是因为您感到孤独吗?

- 是
- 不是
- 

**Q321.** 您吃红烧肉是因为您关注您的体重吗?

- 是
- 不是
- 

**Q322.** 您吃红烧肉是因为它不含有害物质吗 ( 例如杀虫剂、污染物、抗生素 ) ?

- 是
- 不是
- 

**Q323.** 您吃红烧肉是因为它最方便吗?

- 是
- 不是
- 

**Q324.** 您吃红烧肉是因为您需要能量吗?

- 是
- 不是
- 

**Q325.** 您吃红烧肉是因为您对它熟悉吗？

- 是
- 不是
- 

**Q326.** 您吃红烧肉是因为您喜欢它吗？

- 是
- 不是
- 

**Q327.** 您吃红烧肉是因为它能让您感到愉悦的饱腹感吗？

- 是
- 不是
- 

**Q328.** 您吃红烧肉是为了奖励自己吗？

- 是
- 不是
- 

**Q329.** 您吃红烧肉是出于传统吗（例如家庭传统、特殊场合）？

- 是
- 不是
- 

**Q330.** 您吃红烧肉是因为它适用于特定场合吗？

- 是
- 不是
- 

**Q331.** 您吃红烧肉是为了保持均衡饮食吗?

- 是
- 不是
- 

**Q332.** 您吃红烧肉是因为它帮助您社交吗?

- 是
- 不是
- 

**Q333.** 您吃红烧肉是因为它的价格不贵吗?

- 是
- 不是
- 

**Q334.** 您吃红烧肉是因为它自然而然地吸引了您吗 (例如它的颜色吸引了您)?

- 是
- 不是
- 

**Q335.** 您吃红烧肉是因为您不想使试图让你开心的人失望吗?

- 是
- 不是
- 

**Q336.** 您吃红烧肉是因为它很新潮吗?

- 是
- 不是
- 

**Q337.** 您吃红烧肉是因为它打折吗？

- 是
- 不是
- 

**Q338.** 您吃红烧肉是因为它能让你保持身材吗？

- 是
- 不是
- 

**Q339.** 您吃红烧肉是因为它是您的唯一选择吗？

- 是
- 不是
- 

**Q340.** 您吃红烧肉是因为您每天都想吃它吗？

- 是
- 不是
- 

**Q341.** 您不吃红烧肉是因为您不认为它是一种零食吗？

- 是
- 不是
- 

**Q342.** 您不吃红烧肉是因为您不喜欢它吗？



- 是
- 不是
- 

**Q343.** 您不吃红烧肉是因为您不经常吃它吗？

- 是
- 不是
- 

**Q344.** 您不吃红烧肉是因为它的分量大小不合适吗？

- 是
- 不是
- 

**Q345.** 您不吃红烧肉是因为它不足以填饱肚子吗？

- 是
- 不是
- 

**Q346.** 您不吃红烧肉是因为它不健康吗？

- 是
- 不是
- 

**Q347.** 您不吃红烧肉是因为它不方便吗？

- 是
- 不是
- 

**Q348.** 您不吃红烧肉是因为您不想纵容自己吗？

- 是
- 不是
- 

**Q349.** 您不吃红烧肉是因为它不适用于特定场合吗？

- 是
- 不是
- 

**Q350.** 您不吃红烧肉是因为有其他人在的时候您不吃它吗？

- 是
- 不是
- 

**Q351.** 您不吃红烧肉是因为它的价格太高吗？

- 是
- 不是
- 

**Q352.** 您不吃红烧肉是因为您不喜欢它看起来的样子吗？

- 是
- 不是
- 

**Q353.** 您不吃红烧肉是因为它的卡路里太高吗？

- 是
- 不是
- 

**Q354.** 您不吃红烧肉是因为您不应该吃吗（例如出于文化、宗教习俗）？

- 是
- 不是
- 

**Q355.** 您不吃红烧肉是因为您觉得吃它显得您很土吗？

- 是
- 不是
- 

**Q356.** 您不吃红烧肉是因为它不是您在那个时候想吃的东西吗？

- 是
- 不是
- 

**Q357.** 您不吃红烧肉是因为最近您刚吃过它，您不想太经常吃同样的东西吗？

- 是
- 不是
- 

**Q358.** 您不吃红烧肉是因为您每天喜欢吃一样的食物吗（不包括红烧肉的其他食物）？

- 是
- 不是
- 

**Q359.** 您不吃红烧肉是因为这个食物让您感到伤心、孤单或沮丧吗？

- 是
- 不是
- 

**Q360.** 您不吃红烧肉是因为它不是有机的吗？

- 是
- 不是
- 

## Reasons for Dairy Food Choices(Full CATA)

---

Q361.

您吃豆浆吗？

- 是的，我吃
- 不是，我不吃
- 

Q362. 您吃豆浆是因为您习惯吃它吗？

- 是
- 不是
- 

Q363. 您吃豆浆是因为它很健康吗？

- 是
- 不是
- 

Q364. 您吃豆浆是因为它准备起来很快吗？

- 是
- 不是
- 

Q365. 您吃豆浆是因为它的味道很好吗？

- 是
- 不是
-

---

**Q366.** 您吃豆浆是为了纵容自己吗？

- 是
- 不是
- 

**Q367.** 您吃豆浆是因为它是天然的吗（例如没有经过基因改造的）？

- 是
- 不是
- 

**Q368.** 您吃豆浆是因为您不想再花更多的钱吗？

- 是
- 不是
- 

**Q369.** 您吃豆浆是因为它的卡路里很低吗？

- 是
- 不是
- 

**Q370.** 您吃豆浆是因为您很沮丧吗？

- 是
- 不是
- 

**Q371.** 您吃豆浆是因为它让您在别人面前看起来很好吗？

- 是
- 不是
-

---

Q372. 您吃豆浆是因为不吃它会不礼貌吗?

- 是
- 不是
- 

Q373. 您吃豆浆是因为它的呈现方式很有吸引力吗 ( 例如包装 ) ?

- 是
- 不是
- 

Q374. 您吃豆浆是因为它能让您和其他人共度时光吗?

- 是
- 不是
- 

Q375. 您吃豆浆是因为它是有机的是吗?

- 是
- 不是
- 

Q376. 您吃豆浆是因为您从小一直吃它长大吗?

- 是
- 不是
- 

Q377. 您吃豆浆是因为吃它让您很享受吗?

- 是
- 不是
-

---

**Q378.** 您吃豆浆是因为您饿了吗？

- 是
  - 不是
- 

**Q379.** 您吃豆浆是因为您经常吃它吗？

- 是
  - 不是
- 

**Q380.** 您吃豆浆是因为您对它有食欲吗？

- 是
  - 不是
- 

**Q381.** 您吃豆浆是因为它很容易准备吗？

- 是
  - 不是
- 

**Q382.** 您吃豆浆是因为您很伤心吗？

- 是
  - 不是
- 

**Q383.** 您吃豆浆是因为它的脂肪含量低吗？

- 是
  - 不是
-

**Q384.** 您吃豆浆是因为您从广告或电视上看到过它吗？

- 是
- 不是
- 

**Q385.** 您吃豆浆是因为它能使社交聚会更加舒适吗？

- 是
- 不是
- 

**Q386.** 您吃豆浆是因为您应该吃它吗？

- 是
- 不是
- 

**Q387.** 您吃豆浆是因为其他人喜欢它吗？

- 是
- 不是
- 

**Q388.** 您吃豆浆是因为您感到孤独吗？

- 是
- 不是
- 

**Q389.** 您吃豆浆是因为您关注您的体重吗？

- 是
- 不是
-



**Q390.** 您吃豆浆是因为它不含有害物质吗（例如杀虫剂、污染物、抗生素）？

- 是
- 不是
- 

**Q391.** 您吃豆浆是因为它最方便吗？

- 是
- 不是
- 

**Q392.** 您吃豆浆是因为您需要能量吗？

- 是
- 不是
- 

**Q393.** 您吃豆浆是因为您对它熟悉吗？

- 是
- 不是
- 

**Q394.** 您吃豆浆是因为您喜欢它吗？

- 是
- 不是
- 

**Q395.** 您吃豆浆是因为它能让您感到愉悦的饱腹感吗？

- 是
- 不是
-

**Q396.** 您吃豆浆是为了奖励自己吗？

- 是
- 不是
- 

**Q397.** 您吃豆浆是出于传统吗（例如家庭传统、特殊场合）？

- 是
- 不是
- 

**Q398.** 您吃豆浆是因为它适用于特定场合吗？

- 是
- 不是
- 

**Q399.** 您吃豆浆是为了保持均衡饮食吗？

- 是
- 不是
- 

**Q400.** 您吃豆浆是因为它帮助您社交吗？

- 是
- 不是
- 

**Q401.** 您吃豆浆是因为它的价格不贵吗？

- 是
- 不是
-

**Q402.** 您吃豆浆是因为它自然而然地吸引了您吗（例如它的颜色吸引了您）？

- 是
- 不是
- 

**Q403.** 您吃豆浆是因为您不想使试图让你开心的人失望吗？

- 是
- 不是
- 

**Q404.** 您吃豆浆是因为它很新潮吗？

- 是
- 不是
- 

**Q405.** 您吃豆浆是因为它打折吗？

- 是
- 不是
- 

**Q406.** 您吃豆浆是因为它能让你保持身材吗？

- 是
- 不是
- 

**Q407.** 您吃豆浆是因为它是您的唯一选择吗？

- 是
- 不是
-

**Q408.** 您吃豆浆是因为您每天都想吃它吗?

- 是
- 不是
- 

**Q409.** 您不吃豆浆是因为您不认为它是一种零食吗?

- 是
- 不是
- 

**Q410.** 您不吃豆浆是因为您不喜欢它吗?

- 是
- 不是
- 

**Q411.** 您不吃豆浆是因为您不经常吃它吗?

- 是
- 不是
- 

**Q412.** 您不吃豆浆是因为它的分量大小不合适吗?

- 是
- 不是
- 

**Q413.** 您不吃豆浆是因为它不足以填饱肚子吗?

- 是
- 不是
-

**Q414.** 您不吃豆浆是因为它不健康吗？

- 是
- 不是
- 

**Q415.** 您不吃豆浆是因为它不方便吗？

- 是
- 不是
- 

**Q416.** 您不吃豆浆是因为您不想纵容自己吗？

- 是
- 不是
- 

**Q417.** 您不吃豆浆是因为它不适用于特定场合吗？

- 是
- 不是
- 

**Q418.** 您不吃豆浆是因为有其他人在的时候您不吃它吗？

- 是
- 不是
- 

**Q419.** 您不吃豆浆是因为它的价格太高吗？

- 是
- 不是
-

**Q420.** 您不吃豆浆是因为您不喜欢它看起来的样子吗？

- 是
- 不是
- 

**Q421.** 您不吃豆浆是因为它的卡路里太高吗？

- 是
- 不是
- 

**Q422.** 您不吃豆浆是因为您不应该吃吗（例如出于文化、宗教习俗）？

- 是
- 不是
- 

**Q423.** 您不吃豆浆是因为您觉得吃它显得您很土吗？

- 是
- 不是
- 

**Q424.** 您不吃豆浆是因为它不是您在那个时候想吃的东西吗？

- 是
- 不是
- 

**Q425.** 您不吃豆浆是因为最近您刚吃过它，您不想太经常吃同样的东西吗？

- 是
- 不是
-

**Q426.** 您不吃豆浆是因为您每天喜欢吃一样的食物吗（不包括豆浆的其他食物）？

- 是
- 不是
- 

**Q427.** 您不吃豆浆是因为这个食物让您感到伤心、孤单或沮丧吗？

- 是
- 不是
- 

**Q428.** 您不吃豆浆是因为它不是有机的吗？

- 是
- 不是
- 

## Reasons for Fruit Choices(Full CATA)

---

**Q429.**

您吃香蕉吗？

- 是的，我吃
- 不是，我不吃
- 

**Q430.** 您吃香蕉是因为您习惯吃它吗？

- 是
- 不是
- 

**Q431.** 您吃香蕉是因为它很健康吗？

- 是
- 不是
- 

**Q432.** 您吃香蕉是因为它准备起来很快吗?

- 是
- 不是
- 

**Q433.** 您吃香蕉是因为它的味道很好吗?

- 是
- 不是
- 

**Q434.** 您吃香蕉是为了纵容自己吗?

- 是
- 不是
- 

**Q435.** 您吃香蕉是因为它是天然的吗 ( 例如没有经过基因改造的 ) ?

- 是
- 不是
- 

**Q436.** 您吃香蕉是因为您不想再花更多的钱吗?

- 是
- 不是
- 

**Q437.** 您吃香蕉是因为它的卡路里很低吗?



- 是
- 不是
- 

**Q438.** 您吃香蕉是因为您很沮丧吗？

- 是
- 不是
- 

**Q439.** 您吃香蕉是因为它让您在别人面前看起来很好吗？

- 是
- 不是
- 

**Q440.** 您吃香蕉是因为不吃它会不礼貌吗？

- 是
- 不是
- 

**Q441.** 您吃香蕉是因为它的呈现方式很有吸引力吗（例如包装）？

- 是
- 不是
- 

**Q442.** 您吃香蕉是因为它能让您和其他人共度时光吗？

- 是
- 不是
- 

**Q443.** 您吃香蕉是因为它是有机吗？

- 是
- 不是
- 

**Q444.** 您吃香蕉是因为您从小一直吃它长大吗？

- 是
- 不是
- 

**Q445.** 您吃香蕉是因为吃它让您很享受吗？

- 是
- 不是
- 

**Q446.** 您吃香蕉是因为您饿了吗？

- 是
- 不是
- 

**Q447.** 您吃香蕉是因为您经常吃它吗？

- 是
- 不是
- 

**Q448.** 您吃香蕉是因为您对它有食欲吗？

- 是
- 不是
- 

**Q449.** 您吃香蕉是因为它很容易准备吗？

- 是
- 不是
- 

**Q450.** 您吃香蕉是因为您很伤心吗？

- 是
- 不是
- 

**Q451.** 您吃香蕉是因为它的脂肪含量低吗？

- 是
- 不是
- 

**Q452.** 您吃香蕉是因为您从广告或电视上看到过它吗？

- 是
- 不是
- 

**Q453.** 您吃香蕉是因为它能使社交聚会更加舒适吗？

- 是
- 不是
- 

**Q454.** 您吃香蕉是因为您应该吃它吗？

- 是
- 不是
- 

**Q455.** 您吃香蕉是因为其他人喜欢它吗？

- 是
- 不是
- 

**Q456.** 您吃香蕉是因为您感到孤独吗？

- 是
- 不是
- 

**Q457.** 您吃香蕉是因为您关注您的体重吗？

- 是
- 不是
- 

**Q458.** 您吃香蕉是因为它不含有害物质吗（例如杀虫剂、污染物、抗生素）？

- 是
- 不是
- 

**Q459.** 您吃香蕉是因为它最方便吗？

- 是
- 不是
- 

**Q460.** 您吃香蕉是因为您需要能量吗？

- 是
- 不是
- 

**Q461.** 您吃香蕉是因为您对它熟悉吗？

- 是
- 不是
- 

**Q462.** 您吃香蕉是因为您喜欢它吗？

- 是
- 不是
- 

**Q463.** 您吃香蕉是因为它能让您感到愉悦的饱腹感吗？

- 是
- 不是
- 

**Q464.** 您吃香蕉是为了奖励自己吗？

- 是
- 不是
- 

**Q465.** 您吃香蕉是出于传统吗（例如家庭传统、特殊场合）？

- 是
- 不是
- 

**Q466.** 您吃香蕉是因为它适用于特定场合吗？

- 是
- 不是
- 

**Q467.** 您吃香蕉是为了保持均衡饮食吗？

- 是
- 不是
- 

**Q468.** 您吃香蕉是因为它帮助您社交吗?

- 是
- 不是
- 

**Q469.** 您吃香蕉是因为它的价格不贵吗?

- 是
- 不是
- 

**Q470.** 您吃香蕉是因为它自然而然地吸引了您吗 (例如它的颜色吸引了您)?

- 是
- 不是
- 

**Q471.** 您吃香蕉是因为您不想使试图让你开心的人失望吗?

- 是
- 不是
- 

**Q472.** 您吃香蕉是因为它很新潮吗?

- 是
- 不是
- 

**Q473.** 您吃香蕉是因为它打折吗?

- 是
- 不是
- 

**Q474.** 您吃香蕉是因为它能让你保持身材吗?

- 是
- 不是
- 

**Q475.** 您吃香蕉是因为它是您的唯一选择吗?

- 是
- 不是
- 

**Q476.** 您吃香蕉是因为您每天都想吃它吗?

- 是
- 不是
- 

**Q477.** 您不吃香蕉是因为您不认为它是一种零食吗?

- 是
- 不是
- 

**Q478.** 您不吃香蕉是因为您不喜欢它吗?

- 是
- 不是
- 

**Q479.** 您不吃香蕉是因为您不经常吃它吗?

- 是
- 不是
- 

**Q480.** 您不吃香蕉是因为它的分量大小不合适吗？

- 是
- 不是
- 

**Q481.** 您不吃香蕉是因为它不足以填饱肚子吗？

- 是
- 不是
- 

**Q482.** 您不吃香蕉是因为它不健康吗？

- 是
- 不是
- 

**Q483.** 您不吃香蕉是因为它不方便吗？

- 是
- 不是
- 

**Q484.** 您不吃香蕉是因为您不想纵容自己吗？

- 是
- 不是
- 

**Q485.** 您不吃香蕉是因为它不适用于特定场合吗？



- 是
- 不是
- 

**Q486.** 您不吃香蕉是因为有其他人存在的时候您不吃它吗？

- 是
- 不是
- 

**Q487.** 您不吃香蕉是因为它的价格太高吗？

- 是
- 不是
- 

**Q488.** 您不吃香蕉是因为您不喜欢它看起来的样子吗？

- 是
- 不是
- 

**Q489.** 您不吃香蕉是因为它的卡路里太高吗？

- 是
- 不是
- 

**Q490.** 您不吃香蕉是因为您不应该吃吗（例如出于文化、宗教习俗）？

- 是
- 不是
- 

**Q491.** 您不吃香蕉是因为您觉得吃它显得您很土吗？

- 是
- 不是
- 

**Q492.** 您不吃香蕉是因为它不是您在那个时候想吃的东西吗？

- 是
- 不是
- 

**Q493.** 您不吃香蕉是因为最近您刚吃过它，您不想太经常吃同样的东西吗？

- 是
- 不是
- 

**Q494.** 您不吃香蕉是因为您每天喜欢吃一样的食物吗（不包括香蕉的其他食物）？

- 是
- 不是
- 

**Q495.** 您不吃香蕉是因为这个食物让您感到伤心、孤单或沮丧吗？

- 是
- 不是
- 

**Q496.** 您不吃香蕉是因为它不是有机的吗？

- 是
- 不是
- 

## Reasons for Sweet food Choices(Full CATA)

---

**Q497.**

您吃麻球吗？

- 是的，我吃
  - 不是，我不吃
- 

**Q498.** 您吃麻球是因为您习惯吃它吗？

- 是
  - 不是
- 

**Q499.** 您吃麻球是因为它很健康吗？

- 是
  - 不是
- 

**Q500.** 您吃麻球是因为它准备起来很快吗？

- 是
  - 不是
- 

**Q501.** 您吃麻球是因为它的味道很好吗？

- 是
  - 不是
- 

**Q502.** 您吃麻球是为了纵容自己吗？

- 是
- 不是

---

**Q503.** 您吃麻球是因为它是天然的吗 ( 例如没有经过基因改造的 ) ?

- 是
- 不是
- 

**Q504.** 您吃麻球是因为您不想再花更多的钱吗?

- 是
- 不是
- 

**Q505.** 您吃麻球是因为它的卡路里很低吗?

- 是
- 不是
- 

**Q506.** 您吃麻球是因为您很沮丧吗?

- 是
- 不是
- 

**Q507.** 您吃麻球是因为它让您在别人面前看起来很好吗?

- 是
- 不是
- 

**Q508.** 您吃麻球是因为不吃它会不礼貌吗?

- 是
- 不是
-

---

**Q509.** 您吃麻球是因为它的呈现方式很有吸引力吗（例如包装）？

- 是
- 不是
- 

**Q510.** 您吃麻球是因为它能让您和其他人共度时光吗？

- 是
- 不是
- 

**Q511.** 您吃麻球是因为它是有机性的吗？

- 是
- 不是
- 

**Q512.** 您吃麻球是因为您从小一直吃它长大吗？

- 是
- 不是
- 

**Q513.** 您吃麻球是因为吃它让您很享受吗？

- 是
- 不是
- 

**Q514.** 您吃麻球是因为您饿了吗？

- 是
- 不是
-

**Q515.** 您吃麻球是因为您经常吃它吗？

- 是
- 不是
- 

**Q516.** 您吃麻球是因为您对它有食欲吗？

- 是
- 不是
- 

**Q517.** 您吃麻球是因为它很容易准备吗？

- 是
- 不是
- 

**Q518.** 您吃麻球是因为您很伤心吗？

- 是
- 不是
- 

**Q519.** 您吃麻球是因为它的脂肪含量低吗？

- 是
- 不是
- 

**Q520.** 您吃麻球是因为您从广告或电视上看到过它吗？

- 是
- 不是
-

**Q521.** 您吃麻球是因为它能使社交聚会更加舒适吗?

- 是
- 不是
- 

**Q522.** 您吃麻球是因为您应该吃它吗?

- 是
- 不是
- 

**Q523.** 您吃麻球是因为其他人喜欢它吗?

- 是
- 不是
- 

**Q524.** 您吃麻球是因为您感到孤独吗?

- 是
- 不是
- 

**Q525.** 您吃麻球是因为您关注您的体重吗?

- 是
- 不是
- 

**Q526.** 您吃麻球是因为它不含有害物质吗 ( 例如杀虫剂、污染物、抗生素 ) ?

- 是
- 不是
-

**Q527.** 您吃麻球是因为它最方便吗？

- 是
- 不是
- 

**Q528.** 您吃麻球是因为您需要能量吗？

- 是
- 不是
- 

**Q529.** 您吃麻球是因为您对它熟悉吗？

- 是
- 不是
- 

**Q530.** 您吃麻球是因为您喜欢它吗？

- 是
- 不是
- 

**Q531.** 您吃麻球是因为它能让您感到愉悦的饱腹感吗？

- 是
- 不是
- 

**Q532.** 您吃麻球是为了奖励自己吗？

- 是
- 不是
-



**Q533.** 您吃麻球是出于传统吗（例如家庭传统、特殊场合）？

- 是
- 不是
- 

**Q534.** 您吃麻球是因为它适用于特定场合吗？

- 是
- 不是
- 

**Q535.** 您吃麻球是为了保持均衡饮食吗？

- 是
- 不是
- 

**Q536.** 您吃麻球是因为它帮助您社交吗？

- 是
- 不是
- 

**Q537.** 您吃麻球是因为它的价格不贵吗？

- 是
- 不是
- 

**Q538.** 您吃麻球是因为它自然而然地吸引了您吗（例如它的颜色吸引了您）？

- 是
- 不是
-

**Q539.** 您吃麻球是因为您不想使试图让你开心的人失望吗？

- 是
- 不是
- 

**Q540.** 您吃麻球是因为它很新潮吗？

- 是
- 不是
- 

**Q541.** 您吃麻球是因为它打折吗？

- 是
- 不是
- 

**Q542.** 您吃麻球是因为它能让你保持身材吗？

- 是
- 不是
- 

**Q543.** 您吃麻球是因为它是您的唯一选择吗？

- 是
- 不是
- 

**Q544.** 您吃麻球是因为您每天都想吃它吗？

- 是
- 不是
-

**Q545.** 您不吃麻球是因为您不认为它是一种零食吗?

- 是
- 不是
- 

**Q546.** 您不吃麻球是因为您不喜欢它吗?

- 是
- 不是
- 

**Q547.** 您不吃麻球是因为您不经常吃它吗?

- 是
- 不是
- 

**Q548.** 您不吃麻球是因为它的分量大小不合适吗?

- 是
- 不是
- 

**Q549.** 您不吃麻球是因为它不足以填饱肚子吗?

- 是
- 不是
- 

**Q550.** 您不吃麻球是因为它不健康吗?

- 是
- 不是
-

**Q551.** 您不吃麻球是因为它不方便吗？

- 是
- 不是
- 

**Q552.** 您不吃麻球是因为您不想纵容自己吗？

- 是
- 不是
- 

**Q553.** 您不吃麻球是因为它不适用于特定场合吗？

- 是
- 不是
- 

**Q554.** 您不吃麻球是因为有其他人在的时候您不吃它吗？

- 是
- 不是
- 

**Q555.** 您不吃麻球是因为它的价格太高吗？

- 是
- 不是
- 

**Q556.** 您不吃麻球是因为您不喜欢它看起来的样子吗？

- 是
- 不是
-

**Q557.** 您不吃麻球是因为它的卡路里太高吗？

- 是
- 不是
- 

**Q558.** 您不吃麻球是因为您不应该吃吗（例如出于文化、宗教习俗）？

- 是
- 不是
- 

**Q559.** 您不吃麻球是因为您觉得吃它显得您很土吗？

- 是
- 不是
- 

**Q560.** 您不吃麻球是因为它不是您在那个时候想吃的东西吗？

- 是
- 不是
- 

**Q561.** 您不吃麻球是因为最近您刚吃过它，您不想太经常吃同样的东西吗？

- 是
- 不是
- 

**Q562.** 您不吃麻球是因为您每天喜欢吃一样的食物吗（不包括麻球的其他食物）？

- 是
- 不是
-

**Q563.** 您不吃麻球是因为这个食物让您感到伤心、孤单或沮丧吗？

- 是
- 不是
- 

**Q564.** 您不吃麻球是因为它不是有机的吗？

- 是
- 不是
- 

### Reasons for Starchy food choices(RATA)

---

**Q610.**

您吃白米饭吗？

- 是的，我吃
- 不是，我不吃
- 

**Q611.**

试回想您上一次吃白米饭，并请回答以下问题。

**您吃白米饭的原因有哪些（请选择所有适用的选项）**

- ... 因为它让我在别人面前看起来很好
- ... 因为我想每天都吃它
- ... 因为吃它让我很享受
- ... 因为我很沮丧
- ... 因为它准备起来很快
- ... 因为我习惯吃它
- ... 因为我需要能量
- ... 这样我就可以和其他人共度时光

- ... 因为它很容易准备
- ... 为了纵容自己
- ...因为我饿了
- ... 因为它让我保持身材
- ... 因为我关注我的体重
- ... 因为它是天然的 ( 例如没有经过基因改造 )
- ... 保持均衡饮食
- ... 避免让那些试图让我开心的人失望
- ... 因为它很健康
- ... 因为它能令我感到愉悦的饱腹感
- ... 因为它的卡路里很低
- ... 因为它适用于特定场合
- ... 因为它自然而然地吸引了我 ( 吸引人的颜色 )
- ... 因为我感到孤独
- ... 因为我从小吃到大
- ... 因为我应该吃它
- ... 因为它的价格不贵
- ... 因为我不想再花更多的钱
- ... 因为不吃它会不礼貌
- ... 为了奖励自己
- ... 因为这是唯一的选择
- ... 因为我经常吃它
- ... 因为我对它有食欲
- ... 因为它的呈现方式很有吸引力 ( 例如包装 )
- ... 因为它是有机
- ... 因为它帮助我社交
- ... 因为我很伤心
- ... 因为它的味道很好
- ... 因为其他人喜欢它
- ... 因为它打折

- ... 因为它很新潮
  - ... 因为它最方便
  - ... 因为我喜欢它
  - ... 出于传统 ( 例如家庭传统 , 特殊场合 )
  - ... 因为脂肪含量低
  - ... 因为我熟悉它
  - ... 因为我从广告或在电视上看过它
  - ... 因为它使社交聚会更加舒适
  - ... 因为它不含有害物质 ( 例如杀虫剂 , 污染物 , 抗生素 )
- 

**Q612.** 您选择"...因为我习惯吃它"

您认为该陈述有多重要？

- 极其重要
  - 非常重要
  - 一般重要
  - 有点重要
  - 完全不重要
- 

**Q613.** 您选择"... 因为它很健康"

您认为该陈述有多重要？

- 极其重要
  - 非常重要
  - 一般重要
  - 有点重要
  - 完全不重要
- 

**Q614.** 您选择"... 因为它准备起来很快"

您认为该陈述有多重要？



- 极其重要
  - 非常重要
  - 一般重要
  - 有点重要
  - 完全不重要
- 

**Q615.** 您选择"... 因为它的味道很好"

您认为该陈述有多重要？

- 极其重要
  - 非常重要
  - 一般重要
  - 有点重要
  - 完全不重要
- 

**Q616.** 您选择"... 为了纵容自己"

您认为该陈述有多重要？

- 极其重要
  - 非常重要
  - 一般重要
  - 有点重要
  - 完全不重要
- 

**Q617.** 您选择"... 因为它是天然的（例如没有经过基因改造）"

您认为该陈述有多重要？

- 极其重要
- 非常重要
- 一般重要

- 有点重要
  - 完全不重要
- 

**Q618.** 您选择"... 因为我不想再花更多的钱"  
您认为该陈述有多重要？

- 极其重要
  - 非常重要
  - 一般重要
  - 有点重要
  - 完全不重要
- 

**Q619.** 您选择"... 因为它的卡路里很低"  
您认为该陈述有多重要？

- 极其重要
  - 非常重要
  - 一般重要
  - 有点重要
  - 完全不重要
- 

**Q620.** 您选择"... 因为我很沮丧"  
您认为该陈述有多重要？

- 极其重要
  - 非常重要
  - 一般重要
  - 有点重要
  - 完全不重要
-

**Q621.** 您选择"... 因为它让我在别人面前看起来很好"

您认为该陈述有多重要？

- 极其重要
  - 非常重要
  - 一般重要
  - 有点重要
  - 完全不重要
- 

**Q622.** 您选择"... 因为不吃它会不礼貌"

您认为该陈述有多重要？

- 极其重要
  - 非常重要
  - 一般重要
  - 有点重要
  - 完全不重要
- 

**Q623.** 您选择"... 因为它的呈现方式很有吸引力 ( 例如包装 )"

您认为该陈述有多重要？

- 极其重要
  - 非常重要
  - 一般重要
  - 有点重要
  - 完全不重要
- 

**Q624.** 您选择"... 这样我就可以和其他人共度时光"

您认为该陈述有多重要？

- 极其重要

- 非常重要
  - 一般重要
  - 有点重要
  - 完全不重要
- 

**Q625.** 您选择"... 因为它是机器的"

您认为该陈述有多重要？

- 极其重要
  - 非常重要
  - 一般重要
  - 有点重要
  - 完全不重要
- 

**Q626.** 您选择"... 因为我从小吃到大"

您认为该陈述有多重要？

- 极其重要
  - 非常重要
  - 一般重要
  - 有点重要
  - 完全不重要
- 

**Q627.** 您选择"... 因为吃它让我很享受"

您认为该陈述有多重要？

- 极其重要
- 非常重要
- 一般重要
- 有点重要

完全不重要

---

**Q628.** 您选择"...因为我饿了"

您认为该陈述有多重要？

- 极其重要
  - 非常重要
  - 一般重要
  - 有点重要
  - 完全不重要
- 

**Q629.** 您选择"... 因为我经常吃它"

您认为该陈述有多重要？

- 极其重要
  - 非常重要
  - 一般重要
  - 有点重要
  - 完全不重要
- 

**Q630.** 您选择"... 因为我对它有食欲"

您认为该陈述有多重要？

- 极其重要
  - 非常重要
  - 一般重要
  - 有点重要
  - 完全不重要
- 

**Q631.** 您选择"... 因为它很容易准备"

您认为该陈述有多重要？

- 极其重要
  - 非常重要
  - 一般重要
  - 有点重要
  - 完全不重要
- 

**Q632.** 您选择"... 因为我很伤心"

您认为该陈述有多重要？

- 极其重要
  - 非常重要
  - 一般重要
  - 有点重要
  - 完全不重要
- 

**Q633.** 您选择"... 因为脂肪含量低"

您认为该陈述有多重要？

- 极其重要
  - 非常重要
  - 一般重要
  - 有点重要
  - 完全不重要
- 

**Q634.** 您选择"... 因为我从广告或在电视上看过它"

您认为该陈述有多重要？

- 极其重要
- 非常重要

- 一般重要
  - 有点重要
  - 完全不重要
- 

**Q635.** 您选择"... 因为它使社交聚会更加舒适"

您认为该陈述有多重要？

- 极其重要
  - 非常重要
  - 一般重要
  - 有点重要
  - 完全不重要
- 

**Q636.** 您选择"... 因为我应该吃它"

您认为该陈述有多重要？

- 极其重要
  - 非常重要
  - 一般重要
  - 有点重要
  - 完全不重要
- 

**Q637.** 您选择"... 因为其他人喜欢它"

您认为该陈述有多重要？

- 极其重要
- 非常重要
- 一般重要
- 有点重要
- 完全不重要

---

**Q638.** 您选择"... 因为我感到孤独"

您认为该陈述有多重要？

- 极其重要
  - 非常重要
  - 一般重要
  - 有点重要
  - 完全不重要
- 

**Q639.** 您选择"... 因为我关注我的体重"

您认为该陈述有多重要？

- 极其重要
  - 非常重要
  - 一般重要
  - 有点重要
  - 完全不重要
- 

**Q640.** 您选择"... 因为它不含有害物质（例如杀虫剂，污染物，抗生素）"

您认为该陈述有多重要？

- 极其重要
  - 非常重要
  - 一般重要
  - 有点重要
  - 完全不重要
- 

**Q641.** 您选择"... 因为它最方便"

您认为该陈述有多重要？



- 极其重要
  - 非常重要
  - 一般重要
  - 有点重要
  - 完全不重要
- 

**Q642.** 您选择"... 因为我需要能量"

您认为该陈述有多重要？

- 极其重要
  - 非常重要
  - 一般重要
  - 有点重要
  - 完全不重要
- 

**Q643.** 您选择"... 因为我熟悉它"

您认为该陈述有多重要？

- 极其重要
  - 非常重要
  - 一般重要
  - 有点重要
  - 完全不重要
- 

**Q644.** 您选择"... 因为我喜欢它"

您认为该陈述有多重要？

- 极其重要
- 非常重要
- 一般重要

- 有点重要
  - 完全不重要
- 

**Q645.** 您选择"... 因为它能令我感到愉悦的饱腹感"

您认为该陈述有多重要？

- 极其重要
  - 非常重要
  - 一般重要
  - 有点重要
  - 完全不重要
- 

**Q646.** 您选择"... 为了奖励自己"

您认为该陈述有多重要？

- 极其重要
  - 非常重要
  - 一般重要
  - 有点重要
  - 完全不重要
- 

**Q647.** 您选择"... 出于传统（例如家庭传统，特殊场合）"

您认为该陈述有多重要？

- 极其重要
  - 非常重要
  - 一般重要
  - 有点重要
  - 完全不重要
-

**Q648.** 您选择"... 因为它适用于特定场合"

您认为该陈述有多重要？

- 极其重要
  - 非常重要
  - 一般重要
  - 有点重要
  - 完全不重要
- 

**Q649.** 您选择"... 保持均衡饮食"

您认为该陈述有多重要？

- 极其重要
  - 非常重要
  - 一般重要
  - 有点重要
  - 完全不重要
- 

**Q650.** 您选择"... 因为它帮助我社交"

您认为该陈述有多重要？

- 极其重要
  - 非常重要
  - 一般重要
  - 有点重要
  - 完全不重要
- 

**Q651.** 您选择"... 因为它的价格不贵"

您认为该陈述有多重要？

- 极其重要

- 非常重要
  - 一般重要
  - 有点重要
  - 完全不重要
- 

**Q652.** 您选择"... 因为它自然而然地吸引了我（吸引人的颜色）"

您认为该陈述有多重要？

- 极其重要
  - 非常重要
  - 一般重要
  - 有点重要
  - 完全不重要
- 

**Q653.** 您选择"... 避免让那些试图让我开心的人失望"

您认为该陈述有多重要？

- 极其重要
  - 非常重要
  - 一般重要
  - 有点重要
  - 完全不重要
- 

**Q654.** 您选择"... 因为它很新潮"

您认为该陈述有多重要？

- 极其重要
- 非常重要
- 一般重要
- 有点重要

完全不重要

---

**Q655.** 您选择"... 因为它打折"

您认为该陈述有多重要？

- 极其重要
  - 非常重要
  - 一般重要
  - 有点重要
  - 完全不重要
- 

**Q656.** 您选择"... 因为它让我保持身材"

您认为该陈述有多重要？

- 极其重要
  - 非常重要
  - 一般重要
  - 有点重要
  - 完全不重要
- 

**Q657.** 您选择"... 因为这是唯一的选择"

您认为该陈述有多重要？

- 极其重要
  - 非常重要
  - 一般重要
  - 有点重要
  - 完全不重要
- 

**Q658.** 您选择"... 因为我想每天都吃它"

您认为该陈述有多重要？

- 极其重要
  - 非常重要
  - 一般重要
  - 有点重要
  - 完全不重要
- 

**Q659.** 请告诉我们您不吃白米饭的原因（请选择所有适用的选项）

- 它不是我在那个时刻想吃的东西
  - 有其他人在的时候我不吃它
  - 我不经常吃它
  - 我绝不选它。我喜欢每天吃一样的食物
  - 它不足以填饱肚子
  - 它卡路里太高
  - 我不想纵容自己
  - 它不是有机的
  - 这个食物让我感到伤心、孤单或沮丧
  - 价格太高
  - 它不健康
  - 我不认为它是一种零食
  - 我不应该吃它
  - 我不喜欢它看起来的样子
  - 吃它显得我很土
  - 它不适用于特定场合
  - 我最近刚吃过，我不想太经常吃同样的东西
  - 它的分量大小不合适
  - 它不方便
  - 我不喜欢它
-

**Q660.** 您选择”我不认为它是一种零食“

您认为该陈述有多重要？

- 极其重要
  - 非常重要
  - 一般重要
  - 有点重要
  - 完全不重要
- 

**Q661.** 您选择”我不喜欢它“

您认为该陈述有多重要？

- 极其重要
  - 非常重要
  - 一般重要
  - 有点重要
  - 完全不重要
- 

**Q662.** 您选择”我不经常吃它“

您认为该陈述有多重要？

- 极其重要
  - 非常重要
  - 一般重要
  - 有点重要
  - 完全不重要
- 

**Q663.** 您选择”它的分量大小不合适“

您认为该陈述有多重要？

- 极其重要

- 非常重要
  - 一般重要
  - 有点重要
  - 完全不重要
- 

**Q664.** 您选择”它不足以填饱肚子“

您认为该陈述有多重要？

- 极其重要
  - 非常重要
  - 一般重要
  - 有点重要
  - 完全不重要
- 

**Q665.** 您选择”它不健康“

您认为该陈述有多重要？

- 极其重要
  - 非常重要
  - 一般重要
  - 有点重要
  - 完全不重要
- 

**Q666.** 您选择”它不方便“

您认为该陈述有多重要？

- 极其重要
- 非常重要
- 一般重要
- 有点重要



完全不重要

---

**Q667.** 您选择”我不想纵容自己“

您认为该陈述有多重要？

- 极其重要
  - 非常重要
  - 一般重要
  - 有点重要
  - 完全不重要
- 

**Q668.** 您选择”它不适用于特定场合“

您认为该陈述有多重要？

- 极其重要
  - 非常重要
  - 一般重要
  - 有点重要
  - 完全不重要
- 

**Q669.** 您选择”有其他人在的时候我不吃它“

您认为该陈述有多重要？

- 极其重要
  - 非常重要
  - 一般重要
  - 有点重要
  - 完全不重要
- 

**Q670.** 您选择”价格太高“

您认为该陈述有多重要？

- 极其重要
  - 非常重要
  - 一般重要
  - 有点重要
  - 完全不重要
- 

**Q671.** 您选择”我不喜欢它看起来的样子“

您认为该陈述有多重要？

- 极其重要
  - 非常重要
  - 一般重要
  - 有点重要
  - 完全不重要
- 

**Q672.** 您选择”它卡路里太高“

您认为该陈述有多重要？

- 极其重要
  - 非常重要
  - 一般重要
  - 有点重要
  - 完全不重要
- 

**Q673.** 您选择”我不应该吃它“

您认为该陈述有多重要？

- 极其重要
- 非常重要

- 一般重要
  - 有点重要
  - 完全不重要
- 

**Q674.** 您选择”吃它显得我很土“

您认为该陈述有多重要？

- 极其重要
  - 非常重要
  - 一般重要
  - 有点重要
  - 完全不重要
- 

**Q675.** 您选择”它不是我在那个时刻想吃的东西“

您认为该陈述有多重要？

- 极其重要
  - 非常重要
  - 一般重要
  - 有点重要
  - 完全不重要
- 

**Q676.** 您选择”我最近刚吃过， 我不想太经常吃同样的东西“

您认为该陈述有多重要？

- 极其重要
- 非常重要
- 一般重要
- 有点重要
- 完全不重要

---

**Q677.** 您选择”我绝不选它。 我喜欢每天吃一样的食物“  
您认为该陈述有多重要？

- 极其重要
- 非常重要
- 一般重要
- 有点重要
- 完全不重要

---

**Q678.** 您选择”这个食物让我感到伤心、孤单或沮丧“  
您认为该陈述有多重要？

- 极其重要
- 非常重要
- 一般重要
- 有点重要
- 完全不重要

---

**Q679.** 您选择”它不是有机的“  
您认为该陈述有多重要？

- 极其重要
- 非常重要
- 一般重要
- 有点重要
- 完全不重要

---

**Reasons for Protein foods Choices(RATA)**

---

**Q680.**

您吃红烧肉吗？

- 是的，我吃
- 不是，我不吃
- 

**Q681.**

试回想您上一次吃红烧肉，并请回答以下问题。

**您吃红烧肉的原因有哪些（请选择所有适用的选项）**

- ... 因为我不想再花更多的钱
- ... 出于传统（例如家庭传统，特殊场合）
- ... 因为我需要能量
- ... 因为它是天然的（例如没有经过基因改造）
- ... 因为吃它让我很享受
- ... 因为它的呈现方式很有吸引力（例如包装）
- ... 因为我习惯吃它
- ... 因为它准备起来很快
- ... 为了奖励自己
- ... 因为它很新潮
- ... 因为我经常吃它
- ... 因为我关注我的体重
- ... 因为我感到孤独
- ... 因为它能令我感到愉悦的饱腹感
- ... 为了纵容自己
- ... 因为它使社交聚会更加舒适
- ... 因为它不含有害物质（例如杀虫剂，污染物，抗生素）
- ... 因为我喜欢它
- ... 因为其他人喜欢它
- ... 因为它自然而然地吸引了我（吸引人的颜色）
- ... 因为它打折

- ... 因为我很伤心
- ... 因为我应该吃它
- ... 避免让那些试图让我开心的人失望
- ... 因为它的价格不贵
- ... 因为它很健康
- ... 因为脂肪含量低
- ... 这样我就可以和其他人共度时光
- ... 因为我对它有食欲
- ... 因为它是有机的
- ... 因为我从广告或在电视上看过它
- ... 因为它的味道很好
- ... 因为我饿了
- ... 因为它帮助我社交
- ... 因为它的卡路里很低
- ... 因为它让我保持身材
- ... 因为我从小吃到大
- ... 因为它很容易准备
- ... 因为我想每天都吃它
- ... 因为我很沮丧
- ... 因为它最方便
- ... 因为我熟悉它
- ... 保持均衡饮食
- ... 因为它让我在别人面前看起来很好
- ... 因为不吃它会不礼貌
- ... 因为这是唯一的选择
- ... 因为它适用于特定场合

---

**Q682.** 您选择"...因为我习惯吃它"

您认为该陈述有多重要？

- 极其重要
  - 非常重要
  - 一般重要
  - 有点重要
  - 完全不重要
- 

**Q683.** 您选择"... 因为它很健康"

您认为该陈述有多重要？

- 极其重要
  - 非常重要
  - 一般重要
  - 有点重要
  - 完全不重要
- 

**Q684.** 您选择"... 因为它准备起来很快"

您认为该陈述有多重要？

- 极其重要
  - 非常重要
  - 一般重要
  - 有点重要
  - 完全不重要
- 

**Q685.** 您选择"... 因为它的味道很好"

您认为该陈述有多重要？

- 极其重要
- 非常重要
- 一般重要

- 有点重要
  - 完全不重要
- 

**Q686.** 您选择"... 为了纵容自己"

您认为该陈述有多重要？

- 极其重要
  - 非常重要
  - 一般重要
  - 有点重要
  - 完全不重要
- 

**Q687.** 您选择"... 因为它是天然的（例如没有经过基因改造）"

您认为该陈述有多重要？

- 极其重要
  - 非常重要
  - 一般重要
  - 有点重要
  - 完全不重要
- 

**Q688.** 您选择"... 因为我不想再花更多的钱"

您认为该陈述有多重要？

- 极其重要
  - 非常重要
  - 一般重要
  - 有点重要
  - 完全不重要
-



**Q689.** 您选择"... 因为它的卡路里很低"

您认为该陈述有多重要？

- 极其重要
  - 非常重要
  - 一般重要
  - 有点重要
  - 完全不重要
- 

**Q690.** 您选择"... 因为我很沮丧"

您认为该陈述有多重要？

- 极其重要
  - 非常重要
  - 一般重要
  - 有点重要
  - 完全不重要
- 

**Q691.** 您选择"... 因为它让我在别人面前看起来很好"

您认为该陈述有多重要？

- 极其重要
  - 非常重要
  - 一般重要
  - 有点重要
  - 完全不重要
- 

**Q692.** 您选择"... 因为不吃它会不礼貌"

您认为该陈述有多重要？

- 极其重要

- 非常重要
  - 一般重要
  - 有点重要
  - 完全不重要
- 

**Q693.** 您选择"... 因为它的呈现方式很有吸引力 ( 例如包装 ) "

您认为该陈述有多重要？

- 极其重要
  - 非常重要
  - 一般重要
  - 有点重要
  - 完全不重要
- 

**Q694.** 您选择"... 这样我就可以和其他人共度时光"

您认为该陈述有多重要？

- 极其重要
  - 非常重要
  - 一般重要
  - 有点重要
  - 完全不重要
- 

**Q695.** 您选择"... 因为它是机器的"

您认为该陈述有多重要？

- 极其重要
- 非常重要
- 一般重要
- 有点重要

完全不重要

---

**Q696.** 您选择"... 因为我从小吃到大"

您认为该陈述有多重要？

- 极其重要
  - 非常重要
  - 一般重要
  - 有点重要
  - 完全不重要
- 

**Q697.** 您选择"... 因为吃它让我很享受"

您认为该陈述有多重要？

- 极其重要
  - 非常重要
  - 一般重要
  - 有点重要
  - 完全不重要
- 

**Q698.** 您选择"...因为我饿了"

您认为该陈述有多重要？

- 极其重要
  - 非常重要
  - 一般重要
  - 有点重要
  - 完全不重要
- 

**Q699.** 您选择"... 因为我经常吃它"

您认为该陈述有多重要？

- 极其重要
  - 非常重要
  - 一般重要
  - 有点重要
  - 完全不重要
- 

Q700. 您选择"... 因为我对它有食欲"

您认为该陈述有多重要？

- 极其重要
  - 非常重要
  - 一般重要
  - 有点重要
  - 完全不重要
- 

Q701. 您选择"... 因为它很容易准备"

您认为该陈述有多重要？

- 极其重要
  - 非常重要
  - 一般重要
  - 有点重要
  - 完全不重要
- 

Q702. 您选择"... 因为我很伤心"

您认为该陈述有多重要？

- 极其重要
- 非常重要

- 一般重要
  - 有点重要
  - 完全不重要
- 

**Q703.** 您选择"... 因为脂肪含量低"

您认为该陈述有多重要？

- 极其重要
  - 非常重要
  - 一般重要
  - 有点重要
  - 完全不重要
- 

**Q704.** 您选择"... 因为我从广告或在电视上看过它"

您认为该陈述有多重要？

- 极其重要
  - 非常重要
  - 一般重要
  - 有点重要
  - 完全不重要
- 

**Q705.** 您选择"... 因为它使社交聚会更加舒适"

您认为该陈述有多重要？

- 极其重要
- 非常重要
- 一般重要
- 有点重要
- 完全不重要

---

**Q706.** 您选择"... 因为我应该吃它"

您认为该陈述有多重要？

- 极其重要
  - 非常重要
  - 一般重要
  - 有点重要
  - 完全不重要
- 

**Q707.** 您选择"... 因为其他人喜欢它"

您认为该陈述有多重要？

- 极其重要
  - 非常重要
  - 一般重要
  - 有点重要
  - 完全不重要
- 

**Q708.** 您选择"... 因为我感到孤独"

您认为该陈述有多重要？

- 极其重要
  - 非常重要
  - 一般重要
  - 有点重要
  - 完全不重要
- 

**Q709.** 您选择"... 因为我关注我的体重"

您认为该陈述有多重要？

- 极其重要
  - 非常重要
  - 一般重要
  - 有点重要
  - 完全不重要
- 

**Q710.** 您选择"... 因为它不含有害物质（例如杀虫剂，污染物，抗生素）"  
您认为该陈述有多重要？

- 极其重要
  - 非常重要
  - 一般重要
  - 有点重要
  - 完全不重要
- 

**Q711.** 您选择"... 因为它最方便"  
您认为该陈述有多重要？

- 极其重要
  - 非常重要
  - 一般重要
  - 有点重要
  - 完全不重要
- 

**Q712.** 您选择"... 因为我需要能量"  
您认为该陈述有多重要？

- 极其重要
- 非常重要
- 一般重要

- 有点重要
  - 完全不重要
- 

**Q713.** 您选择"... 因为我熟悉它"

您认为该陈述有多重要？

- 极其重要
  - 非常重要
  - 一般重要
  - 有点重要
  - 完全不重要
- 

**Q714.** 您选择"... 因为我喜欢它"

您认为该陈述有多重要？

- 极其重要
  - 非常重要
  - 一般重要
  - 有点重要
  - 完全不重要
- 

**Q715.** 您选择"... 因为它能令我感到愉悦的饱腹感"

您认为该陈述有多重要？

- 极其重要
  - 非常重要
  - 一般重要
  - 有点重要
  - 完全不重要
-



Q716. 您选择"... 为了奖励自己"

您认为该陈述有多重要？

- 极其重要
  - 非常重要
  - 一般重要
  - 有点重要
  - 完全不重要
- 

Q717. 您选择"... 出于传统（例如家庭传统，特殊场合）"

您认为该陈述有多重要？

- 极其重要
  - 非常重要
  - 一般重要
  - 有点重要
  - 完全不重要
- 

Q718. 您选择"... 因为它适用于特定场合"

您认为该陈述有多重要？

- 极其重要
  - 非常重要
  - 一般重要
  - 有点重要
  - 完全不重要
- 

Q719. 您选择"... 保持均衡饮食"

您认为该陈述有多重要？

- 极其重要

- 非常重要
  - 一般重要
  - 有点重要
  - 完全不重要
- 

**Q720.** 您选择"... 因为它帮助我社交"

您认为该陈述有多重要？

- 极其重要
  - 非常重要
  - 一般重要
  - 有点重要
  - 完全不重要
- 

**Q721.** 您选择"... 因为它的价格不贵"

您认为该陈述有多重要？

- 极其重要
  - 非常重要
  - 一般重要
  - 有点重要
  - 完全不重要
- 

**Q722.** 您选择"... 因为它自然而然地吸引了我（吸引人的颜色）"

您认为该陈述有多重要？

- 极其重要
- 非常重要
- 一般重要
- 有点重要

完全不重要

---

**Q723.** 您选择"... 避免让那些试图让我开心的人失望"

您认为该陈述有多重要？

- 极其重要
  - 非常重要
  - 一般重要
  - 有点重要
  - 完全不重要
- 

**Q724.** 您选择"... 因为它很新潮"

您认为该陈述有多重要？

- 极其重要
  - 非常重要
  - 一般重要
  - 有点重要
  - 完全不重要
- 

**Q725.** 您选择"... 因为它打折"

您认为该陈述有多重要？

- 极其重要
  - 非常重要
  - 一般重要
  - 有点重要
  - 完全不重要
- 

**Q726.** 您选择"... 因为它让我保持身材"

您认为该陈述有多重要？

- 极其重要
  - 非常重要
  - 一般重要
  - 有点重要
  - 完全不重要
- 

Q727. 您选择"... 因为这是唯一的选择"

您认为该陈述有多重要？

- 极其重要
  - 非常重要
  - 一般重要
  - 有点重要
  - 完全不重要
- 

Q728. 您选择"... 因为我想每天都吃它"

您认为该陈述有多重要？

- 极其重要
  - 非常重要
  - 一般重要
  - 有点重要
  - 完全不重要
- 

Q729. 请告诉我们您不吃红烧肉的原因（请选择所有适用的选项）

- 它不适用于特定场合
- 我绝不选它。我喜欢每天吃一样的食物
- 我不认为它是一种零食

- 有其他人在的时候我不吃它
  - 这个食物让我感到伤心、孤单或沮丧
  - 它不是我在那个时刻想吃的东西
  - 价格太高
  - 我不经常吃它
  - 我不想纵容自己
  - 它的分量大小不合适
  - 它不足以填饱肚子
  - 它不方便
  - 我不应该吃它
  - 吃它显得我很土
  - 它不是有机的
  - 我不喜欢它
  - 我不喜欢它看起来的样子
  - 它卡路里太高
  - 它不健康
  - 我最近刚吃过，我不想太经常吃同样的东西
- 

**Q730.** 您选择“我不认为它是一种零食“

您认为该陈述有多重要？

- 极其重要
  - 非常重要
  - 一般重要
  - 有点重要
  - 完全不重要
- 

**Q731.** 您选择“我不喜欢它“

您认为该陈述有多重要？

- 极其重要
  - 非常重要
  - 一般重要
  - 有点重要
  - 完全不重要
- 

**Q732.** 您选择”我不经常吃它“

您认为该陈述有多重要？

- 极其重要
  - 非常重要
  - 一般重要
  - 有点重要
  - 完全不重要
- 

**Q733.** 您选择”它的分量大小不合适“

您认为该陈述有多重要？

- 极其重要
  - 非常重要
  - 一般重要
  - 有点重要
  - 完全不重要
- 

**Q734.** 您选择”它不足以填饱肚子“

您认为该陈述有多重要？

- 极其重要
- 非常重要
- 一般重要

- 有点重要
  - 完全不重要
- 

**Q735.** 您选择”它不健康“

您认为该陈述有多重要？

- 极其重要
  - 非常重要
  - 一般重要
  - 有点重要
  - 完全不重要
- 

**Q736.** 您选择”它不方便“

您认为该陈述有多重要？

- 极其重要
  - 非常重要
  - 一般重要
  - 有点重要
  - 完全不重要
- 

**Q737.** 您选择”我不想纵容自己“

您认为该陈述有多重要？

- 极其重要
  - 非常重要
  - 一般重要
  - 有点重要
  - 完全不重要
-

**Q738.** 您选择”它不适用于特定场合“

您认为该陈述有多重要？

- 极其重要
  - 非常重要
  - 一般重要
  - 有点重要
  - 完全不重要
- 

**Q739.** 您选择”有其他人在的时候我不吃它“

您认为该陈述有多重要？

- 极其重要
  - 非常重要
  - 一般重要
  - 有点重要
  - 完全不重要
- 

**Q740.** 您选择”价格太高“

您认为该陈述有多重要？

- 极其重要
  - 非常重要
  - 一般重要
  - 有点重要
  - 完全不重要
- 

**Q741.** 您选择”我不喜欢它看起来的样子“

您认为该陈述有多重要？

- 极其重要



- 非常重要
  - 一般重要
  - 有点重要
  - 完全不重要
- 

**Q742.** 您选择”它卡路里太高“

您认为该陈述有多重要？

- 极其重要
  - 非常重要
  - 一般重要
  - 有点重要
  - 完全不重要
- 

**Q743.** 您选择”我不应该吃它“

您认为该陈述有多重要？

- 极其重要
  - 非常重要
  - 一般重要
  - 有点重要
  - 完全不重要
- 

**Q744.** 您选择”吃它显得我很土“

您认为该陈述有多重要？

- 极其重要
- 非常重要
- 一般重要
- 有点重要

完全不重要

---

**Q745.** 您选择”它不是我在那个时刻想吃的东西“

您认为该陈述有多重要？

- 极其重要
  - 非常重要
  - 一般重要
  - 有点重要
  - 完全不重要
- 

**Q746.** 您选择”我最近刚吃过，我不想太经常吃同样的东西“

您认为该陈述有多重要？

- 极其重要
  - 非常重要
  - 一般重要
  - 有点重要
  - 完全不重要
- 

**Q747.** 您选择”我绝不选它。我喜欢每天吃一样的食物“

您认为该陈述有多重要？

- 极其重要
  - 非常重要
  - 一般重要
  - 有点重要
  - 完全不重要
- 

**Q748.** 您选择”这个食物让我感到伤心、孤单或沮丧“

您认为该陈述有多重要？

- 极其重要
  - 非常重要
  - 一般重要
  - 有点重要
  - 完全不重要
- 

**Q749.** 您选择“它不是有机的“

您认为该陈述有多重要？

- 极其重要
  - 非常重要
  - 一般重要
  - 有点重要
  - 完全不重要
- 

## Reasons for Dairy Food Choices(RATA)

---

**Q750.**

您吃豆浆吗？

- 是的，我吃
  - 不是，我不吃
- 

**Q751.**

试回想您上一次吃豆浆，并请回答以下问题。

您吃豆浆的原因有哪些（请选择所有适用的选项）

- ... 因为我很沮丧
- ... 这样我就可以和其他人共度时光

- ... 因为它不含有害物质 ( 例如杀虫剂 , 污染物 , 抗生素 )
- ... 因为它的味道很好
- ... 出于传统 ( 例如家庭传统 , 特殊场合 )
- ... 因为它很健康
- ... 因为它的价格不贵
- ... 因为我应该吃它
- ... 避免让那些试图让我开心的人失望
- ... 因为不吃它会不礼貌
- ... 因为它帮助我社交
- ... 因为它打折
- ... 因为它是天然的 ( 例如没有经过基因改造 )
- ... 因为我喜欢它
- ... 因为我从广告或在电视上看过它
- ... 因为它自然而然地吸引了我 ( 吸引人的颜色 )
- ... 因为我想每天都吃它
- ... 为了奖励自己
- ... 因为它适用于特定场合
- ... 因为我不想再花更多的钱
- ... 因为它让我保持身材
- ... 因为我饿了
- ... 因为我经常吃它
- ... 因为我感到孤独
- ... 因为它很新潮
- ... 因为我关注我的体重
- ... 因为它准备起来很快
- ... 为了纵容自己
- ... 因为它很容易准备
- ... 因为我从小吃到大
- ... 因为我习惯吃它
- ... 因为它的卡路里很低

- ... 保持均衡饮食
  - ... 因为我需要能量
  - ... 因为我熟悉它
  - ... 因为其他人喜欢它
  - ... 因为我对它有食欲
  - ... 因为脂肪含量低
  - ... 因为它最方便
  - ... 因为它能令我感到愉悦的饱腹感
  - ... 因为吃它让我很享受
  - ... 因为我很伤心
  - ... 因为它是有机
  - ... 因为这是唯一的选择
  - ... 因为它使社交聚会更加舒适
  - ... 因为它让我在别人面前看起来很好
  - ... 因为它的呈现方式很有吸引力 ( 例如包装 )
- 

**Q752.** 您选择"...因为我习惯吃它"

您认为该陈述有多重要？

- 极其重要
  - 非常重要
  - 一般重要
  - 有点重要
  - 完全不重要
- 

**Q753.** 您选择"... 因为它很健康"

您认为该陈述有多重要？

- 极其重要
- 非常重要

- 一般重要
  - 有点重要
  - 完全不重要
- 

**Q754.** 您选择"... 因为它准备起来很快"

您认为该陈述有多重要？

- 极其重要
  - 非常重要
  - 一般重要
  - 有点重要
  - 完全不重要
- 

**Q755.** 您选择"... 因为它的味道很好"

您认为该陈述有多重要？

- 极其重要
  - 非常重要
  - 一般重要
  - 有点重要
  - 完全不重要
- 

**Q756.** 您选择"... 为了纵容自己"

您认为该陈述有多重要？

- 极其重要
- 非常重要
- 一般重要
- 有点重要
- 完全不重要

---

**Q757.** 您选择"... 因为它是天然的 ( 例如没有经过基因改造 )"  
您认为该陈述有多重要？

- 极其重要
  - 非常重要
  - 一般重要
  - 有点重要
  - 完全不重要
- 

**Q758.** 您选择"... 因为我不想再花更多的钱"  
您认为该陈述有多重要？

- 极其重要
  - 非常重要
  - 一般重要
  - 有点重要
  - 完全不重要
- 

**Q759.** 您选择"... 因为它的卡路里很低"  
您认为该陈述有多重要？

- 极其重要
  - 非常重要
  - 一般重要
  - 有点重要
  - 完全不重要
- 

**Q760.** 您选择"... 因为我很沮丧"  
您认为该陈述有多重要？

- 极其重要
  - 非常重要
  - 一般重要
  - 有点重要
  - 完全不重要
- 

**Q761.** 您选择"... 因为它让我在别人面前看起来很好"

您认为该陈述有多重要？

- 极其重要
  - 非常重要
  - 一般重要
  - 有点重要
  - 完全不重要
- 

**Q762.** 您选择"... 因为不吃它会不礼貌"

您认为该陈述有多重要？

- 极其重要
  - 非常重要
  - 一般重要
  - 有点重要
  - 完全不重要
- 

**Q763.** 您选择"... 因为它的呈现方式很有吸引力 ( 例如包装 )"

您认为该陈述有多重要？

- 极其重要
- 非常重要
- 一般重要



- 有点重要
  - 完全不重要
- 

**Q764.** 您选择"... 这样我就可以和其他人共度时光"

您认为该陈述有多重要？

- 极其重要
  - 非常重要
  - 一般重要
  - 有点重要
  - 完全不重要
- 

**Q765.** 您选择"... 因为它是有机"

您认为该陈述有多重要？

- 极其重要
  - 非常重要
  - 一般重要
  - 有点重要
  - 完全不重要
- 

**Q766.** 您选择"... 因为我从小吃到大"

您认为该陈述有多重要？

- 极其重要
  - 非常重要
  - 一般重要
  - 有点重要
  - 完全不重要
-

Q767. 您选择"... 因为吃它让我很享受"

您认为该陈述有多重要？

- 极其重要
  - 非常重要
  - 一般重要
  - 有点重要
  - 完全不重要
- 

Q768. 您选择"...因为我饿了"

您认为该陈述有多重要？

- 极其重要
  - 非常重要
  - 一般重要
  - 有点重要
  - 完全不重要
- 

Q769. 您选择"... 因为我经常吃它"

您认为该陈述有多重要？

- 极其重要
  - 非常重要
  - 一般重要
  - 有点重要
  - 完全不重要
- 

Q770. 您选择"... 因为我对它有食欲"

您认为该陈述有多重要？

- 极其重要

- 非常重要
  - 一般重要
  - 有点重要
  - 完全不重要
- 

Q771. 您选择"... 因为它很容易准备"

您认为该陈述有多重要？

- 极其重要
  - 非常重要
  - 一般重要
  - 有点重要
  - 完全不重要
- 

Q772. 您选择"... 因为我很伤心"

您认为该陈述有多重要？

- 极其重要
  - 非常重要
  - 一般重要
  - 有点重要
  - 完全不重要
- 

Q773. 您选择"... 因为脂肪含量低"

您认为该陈述有多重要？

- 极其重要
- 非常重要
- 一般重要
- 有点重要

完全不重要

---

**Q774.** 您选择"... 因为我从广告或在电视上看过它"

您认为该陈述有多重要？

- 极其重要
  - 非常重要
  - 一般重要
  - 有点重要
  - 完全不重要
- 

**Q775.** 您选择"... 因为它使社交聚会更加舒适"

您认为该陈述有多重要？

- 极其重要
  - 非常重要
  - 一般重要
  - 有点重要
  - 完全不重要
- 

**Q776.** 您选择"... 因为我应该吃它"

您认为该陈述有多重要？

- 极其重要
  - 非常重要
  - 一般重要
  - 有点重要
  - 完全不重要
- 

**Q777.** 您选择"... 因为其他人喜欢它"

您认为该陈述有多重要？

- 极其重要
  - 非常重要
  - 一般重要
  - 有点重要
  - 完全不重要
- 

**Q778.** 您选择"... 因为我感到孤独"

您认为该陈述有多重要？

- 极其重要
  - 非常重要
  - 一般重要
  - 有点重要
  - 完全不重要
- 

**Q779.** 您选择"... 因为我关注我的体重"

您认为该陈述有多重要？

- 极其重要
  - 非常重要
  - 一般重要
  - 有点重要
  - 完全不重要
- 

**Q780.** 您选择"... 因为它不含有害物质（例如杀虫剂，污染物，抗生素）"

您认为该陈述有多重要？

- 极其重要
- 非常重要

- 一般重要
  - 有点重要
  - 完全不重要
- 

**Q781.** 您选择"... 因为它最方便"

您认为该陈述有多重要？

- 极其重要
  - 非常重要
  - 一般重要
  - 有点重要
  - 完全不重要
- 

**Q782.** 您选择"... 因为我需要能量"

您认为该陈述有多重要？

- 极其重要
  - 非常重要
  - 一般重要
  - 有点重要
  - 完全不重要
- 

**Q783.** 您选择"... 因为我熟悉它"

您认为该陈述有多重要？

- 极其重要
- 非常重要
- 一般重要
- 有点重要
- 完全不重要

---

**Q784.** 您选择"... 因为我喜欢它"

您认为该陈述有多重要？

- 极其重要
  - 非常重要
  - 一般重要
  - 有点重要
  - 完全不重要
- 

**Q785.** 您选择"... 因为它能令我感到愉悦的饱腹感"

您认为该陈述有多重要？

- 极其重要
  - 非常重要
  - 一般重要
  - 有点重要
  - 完全不重要
- 

**Q786.** 您选择"... 为了奖励自己"

您认为该陈述有多重要？

- 极其重要
  - 非常重要
  - 一般重要
  - 有点重要
  - 完全不重要
- 

**Q787.** 您选择"... 出于传统 ( 例如家庭传统 , 特殊场合 ) "

您认为该陈述有多重要？

- 极其重要
  - 非常重要
  - 一般重要
  - 有点重要
  - 完全不重要
- 

**Q788.** 您选择"... 因为它适用于特定场合"

您认为该陈述有多重要？

- 极其重要
  - 非常重要
  - 一般重要
  - 有点重要
  - 完全不重要
- 

**Q789.** 您选择"... 保持均衡饮食"

您认为该陈述有多重要？

- 极其重要
  - 非常重要
  - 一般重要
  - 有点重要
  - 完全不重要
- 

**Q790.** 您选择"... 因为它帮助我社交"

您认为该陈述有多重要？

- 极其重要
- 非常重要
- 一般重要



- 有点重要
  - 完全不重要
- 

**Q791.** 您选择"... 因为它的价格不贵"

您认为该陈述有多重要？

- 极其重要
  - 非常重要
  - 一般重要
  - 有点重要
  - 完全不重要
- 

**Q792.** 您选择"... 因为它自然而然地吸引了我（吸引人的颜色）"

您认为该陈述有多重要？

- 极其重要
  - 非常重要
  - 一般重要
  - 有点重要
  - 完全不重要
- 

**Q793.** 您选择"... 避免让那些试图让我开心的人失望"

您认为该陈述有多重要？

- 极其重要
  - 非常重要
  - 一般重要
  - 有点重要
  - 完全不重要
-

**Q794.** 您选择"... 因为它很新潮"

您认为该陈述有多重要？

- 极其重要
  - 非常重要
  - 一般重要
  - 有点重要
  - 完全不重要
- 

**Q795.** 您选择"... 因为它打折"

您认为该陈述有多重要？

- 极其重要
  - 非常重要
  - 一般重要
  - 有点重要
  - 完全不重要
- 

**Q796.** 您选择"... 因为它让我保持身材"

您认为该陈述有多重要？

- 极其重要
  - 非常重要
  - 一般重要
  - 有点重要
  - 完全不重要
- 

**Q797.** 您选择"... 因为这是唯一的选择"

您认为该陈述有多重要？

- 极其重要

- 非常重要
  - 一般重要
  - 有点重要
  - 完全不重要
- 

**Q798.** 您选择"... 因为我想每天都吃它"

您认为该陈述有多重要？

- 极其重要
  - 非常重要
  - 一般重要
  - 有点重要
  - 完全不重要
- 

**Q799.** 请告诉我们您不吃豆浆的原因（请选择所有适用的选项）

- 吃它显得我很土
- 我不喜欢它看起来的样子
- 它不是有机的
- 它卡路里太高
- 我不经常吃它
- 它不适用于特定场合
- 有其他人在的时候我不吃它
- 我绝不选它。我喜欢每天吃一样的食物
- 这个食物让我感到伤心、孤单或沮丧
- 价格太高
- 我不认为它是一种零食
- 它不方便
- 它不健康
- 它的分量大小不合适

- 我不喜欢它
  - 我最近刚吃过，我不想太经常吃同样的东西
  - 它不是我在那个时刻想吃的东西
  - 我不想纵容自己
  - 它不足以填饱肚子
  - 我不应该吃它
- 

**Q800.** 您选择”我不认为它是一种零食“

您认为该陈述有多重要？

- 极其重要
  - 非常重要
  - 一般重要
  - 有点重要
  - 完全不重要
- 

**Q801.** 您选择”我不喜欢它“

您认为该陈述有多重要？

- 极其重要
  - 非常重要
  - 一般重要
  - 有点重要
  - 完全不重要
- 

**Q802.** 您选择”我不经常吃它“

您认为该陈述有多重要？

- 极其重要
- 非常重要

- 一般重要
  - 有点重要
  - 完全不重要
- 

**Q803.** 您选择”它的分量大小不合适“

您认为该陈述有多重要？

- 极其重要
  - 非常重要
  - 一般重要
  - 有点重要
  - 完全不重要
- 

**Q804.** 您选择”它不足以填饱肚子“

您认为该陈述有多重要？

- 极其重要
  - 非常重要
  - 一般重要
  - 有点重要
  - 完全不重要
- 

**Q805.** 您选择”它不健康“

您认为该陈述有多重要？

- 极其重要
- 非常重要
- 一般重要
- 有点重要
- 完全不重要

---

**Q806.** 您选择”它不方便“

您认为该陈述有多重要？

- 极其重要
  - 非常重要
  - 一般重要
  - 有点重要
  - 完全不重要
- 

**Q807.** 您选择”我不想纵容自己“

您认为该陈述有多重要？

- 极其重要
  - 非常重要
  - 一般重要
  - 有点重要
  - 完全不重要
- 

**Q808.** 您选择”它不适用于特定场合“

您认为该陈述有多重要？

- 极其重要
  - 非常重要
  - 一般重要
  - 有点重要
  - 完全不重要
- 

**Q809.** 您选择”有其他人在的时候我不吃它“

您认为该陈述有多重要？

- 极其重要
  - 非常重要
  - 一般重要
  - 有点重要
  - 完全不重要
- 

**Q810.** 您选择”价格太高“  
您认为该陈述有多重要？

- 极其重要
  - 非常重要
  - 一般重要
  - 有点重要
  - 完全不重要
- 

**Q811.** 您选择”我不喜欢它看起来的样子“  
您认为该陈述有多重要？

- 极其重要
  - 非常重要
  - 一般重要
  - 有点重要
  - 完全不重要
- 

**Q812.** 您选择”它卡路里太高“  
您认为该陈述有多重要？

- 极其重要
- 非常重要
- 一般重要

- 有点重要
  - 完全不重要
- 

**Q813.** 您选择”我不应该吃它“

您认为该陈述有多重要？

- 极其重要
  - 非常重要
  - 一般重要
  - 有点重要
  - 完全不重要
- 

**Q814.** 您选择”吃它显得我很土“

您认为该陈述有多重要？

- 极其重要
  - 非常重要
  - 一般重要
  - 有点重要
  - 完全不重要
- 

**Q815.** 您选择”它不是我在那个时刻想吃的东西“

您认为该陈述有多重要？

- 极其重要
  - 非常重要
  - 一般重要
  - 有点重要
  - 完全不重要
-



**Q816.** 您选择”我最近刚吃过，我不想太经常吃同样的东西“

您认为该陈述有多重要？

- 极其重要
  - 非常重要
  - 一般重要
  - 有点重要
  - 完全不重要
- 

**Q817.** 您选择”我绝不选它。我喜欢每天吃一样的食物“

您认为该陈述有多重要？

- 极其重要
  - 非常重要
  - 一般重要
  - 有点重要
  - 完全不重要
- 

**Q818.** 您选择”这个食物让我感到伤心、孤单或沮丧“

您认为该陈述有多重要？

- 极其重要
  - 非常重要
  - 一般重要
  - 有点重要
  - 完全不重要
- 

**Q819.** 您选择”它不是有机的“

您认为该陈述有多重要？

- 极其重要

- 非常重要
  - 一般重要
  - 有点重要
  - 完全不重要
- 

## Reasons for Fruit Choices(RATA)

---

Q820.

您吃香蕉吗？

- 是的，我吃
  - 不是，我不吃
- 

Q821.

试回想您上一次吃香蕉，并请回答以下问题。

您吃香蕉的原因有哪些（请选择所有适用的选项）

- ... 因为我想每天都吃它
- ... 因为我经常吃它
- ... 保持均衡饮食
- ... 为了奖励自己
- ... 因为我应该吃它
- ... 因为我需要能量
- ... 因为它准备起来很快
- ... 因为不吃它会不礼貌
- ... 因为它的价格不贵
- ... 因为它让我在别人面前看起来很好
- ... 因为脂肪含量低
- ... 因为我饿了
- ... 因为我很沮丧

- ... 因为吃它让我很享受
- ... 因为我很伤心
- ... 避免让那些试图让我开心的人失望
- ... 因为它能令我感到愉悦的饱腹感
- ... 因为我从广告或在电视上看过它
- ... 因为它自然而然地吸引了我 ( 吸引人的颜色 )
- ... 出于传统 ( 例如家庭传统 · 特殊场合 )
- ... 因为我习惯吃它
- ... 这样我就可以和其他人共度时光
- ... 因为它的卡路里很低
- ... 因为我喜欢它
- ... 为了纵容自己
- ... 因为我熟悉它
- ... 因为我感到孤独
- ... 因为它很健康
- ... 因为我对它有食欲
- ... 因为它让我保持身材
- ... 因为它很新潮
- ... 因为它帮助我社交
- ... 因为这是唯一的选择
- ... 因为我不想再花更多的钱
- ... 因为它很容易准备
- ... 因为它适用于特定场合
- ... 因为它使社交聚会更加舒适
- ... 因为它的味道很好
- ... 因为其他人喜欢它
- ... 因为它最方便
- ... 因为它是天然的 ( 例如没有经过基因改造 )
- ... 因为它打折
- ... 因为它的呈现方式很有吸引力 ( 例如包装 )

- ... 因为我从小吃到大
  - ... 因为它不含有害物质 ( 例如杀虫剂 , 污染物 , 抗生素 )
  - ... 因为我关注我的体重
  - ... 因为它是机器的
- 

**Q822.** 您选择"...因为我习惯吃它"

您认为该陈述有多重要？

- 极其重要
  - 非常重要
  - 一般重要
  - 有点重要
  - 完全不重要
- 

**Q823.** 您选择"... 因为它很健康"

您认为该陈述有多重要？

- 极其重要
  - 非常重要
  - 一般重要
  - 有点重要
  - 完全不重要
- 

**Q824.** 您选择"... 因为它准备起来很快"

您认为该陈述有多重要？

- 极其重要
- 非常重要
- 一般重要
- 有点重要

完全不重要

---

**Q825.** 您选择"... 因为它的味道很好"

您认为该陈述有多重要？

- 极其重要
  - 非常重要
  - 一般重要
  - 有点重要
  - 完全不重要
- 

**Q826.** 您选择"... 为了纵容自己"

您认为该陈述有多重要？

- 极其重要
  - 非常重要
  - 一般重要
  - 有点重要
  - 完全不重要
- 

**Q827.** 您选择"... 因为它是天然的（例如没有经过基因改造）"

您认为该陈述有多重要？

- 极其重要
  - 非常重要
  - 一般重要
  - 有点重要
  - 完全不重要
- 

**Q828.** 您选择"... 因为我不想再花更多的钱"

您认为该陈述有多重要？

- 极其重要
  - 非常重要
  - 一般重要
  - 有点重要
  - 完全不重要
- 

**Q829.** 您选择"... 因为它的卡路里很低"

您认为该陈述有多重要？

- 极其重要
  - 非常重要
  - 一般重要
  - 有点重要
  - 完全不重要
- 

**Q830.** 您选择"... 因为我很沮丧"

您认为该陈述有多重要？

- 极其重要
  - 非常重要
  - 一般重要
  - 有点重要
  - 完全不重要
- 

**Q831.** 您选择"... 因为它让我在别人面前看起来很好"

您认为该陈述有多重要？

- 极其重要
- 非常重要

- 一般重要
  - 有点重要
  - 完全不重要
- 

**Q832.** 您选择"... 因为不吃它会不礼貌"

您认为该陈述有多重要？

- 极其重要
  - 非常重要
  - 一般重要
  - 有点重要
  - 完全不重要
- 

**Q833.** 您选择"... 因为它的呈现方式很有吸引力 ( 例如包装 )"

您认为该陈述有多重要？

- 极其重要
  - 非常重要
  - 一般重要
  - 有点重要
  - 完全不重要
- 

**Q834.** 您选择"... 这样我就可以和其他人共度时光"

您认为该陈述有多重要？

- 极其重要
- 非常重要
- 一般重要
- 有点重要
- 完全不重要

---

**Q835.** 您选择"... 因为它是有机的"

您认为该陈述有多重要？

- 极其重要
  - 非常重要
  - 一般重要
  - 有点重要
  - 完全不重要
- 

**Q836.** 您选择"... 因为我从小吃到大"

您认为该陈述有多重要？

- 极其重要
  - 非常重要
  - 一般重要
  - 有点重要
  - 完全不重要
- 

**Q837.** 您选择"... 因为吃它让我很享受"

您认为该陈述有多重要？

- 极其重要
  - 非常重要
  - 一般重要
  - 有点重要
  - 完全不重要
- 

**Q838.** 您选择"...因为我饿了"

您认为该陈述有多重要？



- 极其重要
  - 非常重要
  - 一般重要
  - 有点重要
  - 完全不重要
- 

**Q839.** 您选择"... 因为我经常吃它"

您认为该陈述有多重要？

- 极其重要
  - 非常重要
  - 一般重要
  - 有点重要
  - 完全不重要
- 

**Q840.** 您选择"... 因为我对它有食欲"

您认为该陈述有多重要？

- 极其重要
  - 非常重要
  - 一般重要
  - 有点重要
  - 完全不重要
- 

**Q841.** 您选择"... 因为它很容易准备"

您认为该陈述有多重要？

- 极其重要
- 非常重要
- 一般重要

- 有点重要
  - 完全不重要
- 

**Q842.** 您选择"... 因为我很伤心"

您认为该陈述有多重要？

- 极其重要
  - 非常重要
  - 一般重要
  - 有点重要
  - 完全不重要
- 

**Q843.** 您选择"... 因为脂肪含量低"

您认为该陈述有多重要？

- 极其重要
  - 非常重要
  - 一般重要
  - 有点重要
  - 完全不重要
- 

**Q844.** 您选择"... 因为我从广告或在电视上看过它"

您认为该陈述有多重要？

- 极其重要
  - 非常重要
  - 一般重要
  - 有点重要
  - 完全不重要
-

**Q845.** 您选择"... 因为它使社交聚会更加舒适"

您认为该陈述有多重要？

- 极其重要
  - 非常重要
  - 一般重要
  - 有点重要
  - 完全不重要
- 

**Q846.** 您选择"... 因为我应该吃它"

您认为该陈述有多重要？

- 极其重要
  - 非常重要
  - 一般重要
  - 有点重要
  - 完全不重要
- 

**Q847.** 您选择"... 因为其他人喜欢它"

您认为该陈述有多重要？

- 极其重要
  - 非常重要
  - 一般重要
  - 有点重要
  - 完全不重要
- 

**Q848.** 您选择"... 因为我感到孤独"

您认为该陈述有多重要？

- 极其重要

- 非常重要
  - 一般重要
  - 有点重要
  - 完全不重要
- 

**Q849.** 您选择"... 因为我关注我的体重"

您认为该陈述有多重要？

- 极其重要
  - 非常重要
  - 一般重要
  - 有点重要
  - 完全不重要
- 

**Q850.** 您选择"... 因为它不含有害物质（例如杀虫剂，污染物，抗生素）"

您认为该陈述有多重要？

- 极其重要
  - 非常重要
  - 一般重要
  - 有点重要
  - 完全不重要
- 

**Q851.** 您选择"... 因为它最方便"

您认为该陈述有多重要？

- 极其重要
- 非常重要
- 一般重要
- 有点重要

完全不重要

---

**Q852.** 您选择"... 因为我需要能量"

您认为该陈述有多重要？

- 极其重要
  - 非常重要
  - 一般重要
  - 有点重要
  - 完全不重要
- 

**Q853.** 您选择"... 因为我熟悉它"

您认为该陈述有多重要？

- 极其重要
  - 非常重要
  - 一般重要
  - 有点重要
  - 完全不重要
- 

**Q854.** 您选择"... 因为我喜欢它"

您认为该陈述有多重要？

- 极其重要
  - 非常重要
  - 一般重要
  - 有点重要
  - 完全不重要
- 

**Q855.** 您选择"... 因为它能令我感到愉悦的饱腹感"

您认为该陈述有多重要？

- 极其重要
  - 非常重要
  - 一般重要
  - 有点重要
  - 完全不重要
- 

**Q856.** 您选择"... 为了奖励自己"

您认为该陈述有多重要？

- 极其重要
  - 非常重要
  - 一般重要
  - 有点重要
  - 完全不重要
- 

**Q857.** 您选择"... 出于传统（例如家庭传统，特殊场合）"

您认为该陈述有多重要？

- 极其重要
  - 非常重要
  - 一般重要
  - 有点重要
  - 完全不重要
- 

**Q858.** 您选择"... 因为它适用于特定场合"

您认为该陈述有多重要？

- 极其重要
- 非常重要

- 一般重要
  - 有点重要
  - 完全不重要
- 

**Q859.** 您选择"... 保持均衡饮食"

您认为该陈述有多重要？

- 极其重要
  - 非常重要
  - 一般重要
  - 有点重要
  - 完全不重要
- 

**Q860.** 您选择"... 因为它帮助我社交"

您认为该陈述有多重要？

- 极其重要
  - 非常重要
  - 一般重要
  - 有点重要
  - 完全不重要
- 

**Q861.** 您选择"... 因为它的价格不贵"

您认为该陈述有多重要？

- 极其重要
- 非常重要
- 一般重要
- 有点重要
- 完全不重要

---

**Q862.** 您选择"... 因为它自然而然地吸引了我 ( 吸引人的颜色 )"

您认为该陈述有多重要？

- 极其重要
  - 非常重要
  - 一般重要
  - 有点重要
  - 完全不重要
- 

**Q863.** 您选择"... 避免让那些试图让我开心的人失望"

您认为该陈述有多重要？

- 极其重要
  - 非常重要
  - 一般重要
  - 有点重要
  - 完全不重要
- 

**Q864.** 您选择"... 因为它很新潮"

您认为该陈述有多重要？

- 极其重要
  - 非常重要
  - 一般重要
  - 有点重要
  - 完全不重要
- 

**Q865.** 您选择"... 因为它打折"

您认为该陈述有多重要？



- 极其重要
  - 非常重要
  - 一般重要
  - 有点重要
  - 完全不重要
- 

**Q866.** 您选择"... 因为它让我保持身材"

您认为该陈述有多重要？

- 极其重要
  - 非常重要
  - 一般重要
  - 有点重要
  - 完全不重要
- 

**Q867.** 您选择"... 因为这是唯一的选择"

您认为该陈述有多重要？

- 极其重要
  - 非常重要
  - 一般重要
  - 有点重要
  - 完全不重要
- 

**Q868.** 您选择"... 因为我想每天都吃它"

您认为该陈述有多重要？

- 极其重要
- 非常重要
- 一般重要

- 有点重要
- 完全不重要
- 

**Q869.** 请告诉我们您不吃香蕉的原因（请选择所有适用的选项）

- 我不经常吃它
- 我不喜欢它看起来的样子
- 我不认为它是一种零食
- 我绝不选它。我喜欢每天吃一样的食物
- 它不方便
- 它不足以填饱肚子
- 吃它显得我很土
- 它不健康
- 我不想纵容自己
- 我不应该吃它
- 它卡路里太高
- 它不是我在那个时刻想吃的东西
- 有其他人在的时候我不吃它
- 它不适用于特定场合
- 这个食物让我感到伤心、孤单或沮丧
- 价格太高
- 它不是有机的
- 我不喜欢它
- 我最近刚吃过，我不想太经常吃同样的东西
- 它的分量大小不合适
- 

**Q870.** 您选择“我不认为它是一种零食“

您认为该陈述有多重要？

- 极其重要

- 非常重要
  - 一般重要
  - 有点重要
  - 完全不重要
- 

**Q871.** 您选择”我不喜欢它“

您认为该陈述有多重要？

- 极其重要
  - 非常重要
  - 一般重要
  - 有点重要
  - 完全不重要
- 

**Q872.** 您选择”我不经常吃它“

您认为该陈述有多重要？

- 极其重要
  - 非常重要
  - 一般重要
  - 有点重要
  - 完全不重要
- 

**Q873.** 您选择”它的分量大小不合适“

您认为该陈述有多重要？

- 极其重要
- 非常重要
- 一般重要
- 有点重要

完全不重要

---

**Q874.** 您选择”它不足以填饱肚子“

您认为该陈述有多重要？

- 极其重要
  - 非常重要
  - 一般重要
  - 有点重要
  - 完全不重要
- 

**Q875.** 您选择”它不健康“

您认为该陈述有多重要？

- 极其重要
  - 非常重要
  - 一般重要
  - 有点重要
  - 完全不重要
- 

**Q876.** 您选择”它不方便“

您认为该陈述有多重要？

- 极其重要
  - 非常重要
  - 一般重要
  - 有点重要
  - 完全不重要
- 

**Q877.** 您选择”我不想纵容自己“

您认为该陈述有多重要？

- 极其重要
  - 非常重要
  - 一般重要
  - 有点重要
  - 完全不重要
- 

**Q878.** 您选择”它不适用于特定场合“

您认为该陈述有多重要？

- 极其重要
  - 非常重要
  - 一般重要
  - 有点重要
  - 完全不重要
- 

**Q879.** 您选择”有其他人在的时候我不吃它“

您认为该陈述有多重要？

- 极其重要
  - 非常重要
  - 一般重要
  - 有点重要
  - 完全不重要
- 

**Q880.** 您选择”价格太高“

您认为该陈述有多重要？

- 极其重要
- 非常重要

- 一般重要
  - 有点重要
  - 完全不重要
- 

**Q881.** 您选择”我不喜欢它看起来的样子“  
您认为该陈述有多重要？

- 极其重要
  - 非常重要
  - 一般重要
  - 有点重要
  - 完全不重要
- 

**Q882.** 您选择”它卡路里太高“  
您认为该陈述有多重要？

- 极其重要
  - 非常重要
  - 一般重要
  - 有点重要
  - 完全不重要
- 

**Q883.** 您选择”我不应该吃它“  
您认为该陈述有多重要？

- 极其重要
- 非常重要
- 一般重要
- 有点重要
- 完全不重要

---

**Q884.** 您选择”吃它显得我很土“

您认为该陈述有多重要？

- 极其重要
  - 非常重要
  - 一般重要
  - 有点重要
  - 完全不重要
- 

**Q885.** 您选择”它不是我在那个时刻想吃的东西“

您认为该陈述有多重要？

- 极其重要
  - 非常重要
  - 一般重要
  - 有点重要
  - 完全不重要
- 

**Q886.** 您选择”我最近刚吃过， 我不想太经常吃同样的东西“

您认为该陈述有多重要？

- 极其重要
  - 非常重要
  - 一般重要
  - 有点重要
  - 完全不重要
- 

**Q887.** 您选择”我绝不选它。 我喜欢每天吃一样的食物“

您认为该陈述有多重要？

- 极其重要
  - 非常重要
  - 一般重要
  - 有点重要
  - 完全不重要
- 

**Q888.** 您选择”这个食物让我感到伤心、孤单或沮丧“  
您认为该陈述有多重要？

- 极其重要
  - 非常重要
  - 一般重要
  - 有点重要
  - 完全不重要
- 

**Q889.** 您选择”它不是有机的“  
您认为该陈述有多重要？

- 极其重要
  - 非常重要
  - 一般重要
  - 有点重要
  - 完全不重要
- 

## Reasons for Sweet food Choices(RATA)

---

**Q890.**

您吃麻球吗？

- 是的，我吃



不是，我不吃

---

### Q891.

试回想您上一次吃麻球，并请回答以下问题。

**您吃麻球的原因有哪些（请选择所有适用的选项）**

- ... 因为它很容易准备
- ... 因为它很新潮
- ... 因为吃它让我很享受
- ... 因为我想每天都吃它
- ... 因为它是天然的（例如没有经过基因改造）
- ... 因为我从小吃到大
- ... 因为它的价格不贵
- ... 因为它使社交聚会更加舒适
- ... 因为我关注我的体重
- ... 因为它让我保持身材
- ... 因为我对它有食欲
- ... 因为它适用于特定场合
- ... 因为我从广告或在电视上看过它
- ... 因为它让我在别人面前看起来很好
- ... 因为它是有机的
- ... 因为我习惯吃它
- ... 因为脂肪含量低
- ... 出于传统（例如家庭传统，特殊场合）
- ... 为了纵容自己
- ... 因为它的呈现方式很有吸引力（例如包装）
- ... 因为其他人喜欢它
- ... 这样我就可以和其他人共度时光
- ... 因为它打折
- ... 因为我熟悉它

- ... 因为它的卡路里很低
- ... 因为我很伤心
- ... 因为我不想再花更多的钱
- ... 因为我应该吃它
- ... 因为我喜欢它
- ... 因为它能令我感到愉悦的饱腹感
- ... 因为我感到孤独
- ... 因为它准备起来很快
- ... 因为它帮助我社交
- ... 避免让那些试图让我开心的人失望
- ... 因为我很沮丧
- ... 因为我经常吃它
- ... 因为不吃它会不礼貌
- ... 因为它很健康
- ... 因为它不含有害物质 ( 例如杀虫剂 , 污染物 , 抗生素 )
- ... 因为它最方便
- ... 保持均衡饮食
- ... 因为它自然而然地吸引了我 ( 吸引人的颜色 )
- ... 因为它的味道很好
- ... 因为我需要能量
- ... 为了奖励自己
- ... 因为这是唯一的选择
- ...因为我饿了

---

### Q892. 您选择"...因为我习惯吃它"

您认为该陈述有多重要？

- 极其重要
- 非常重要
- 一般重要

- 有点重要
  - 完全不重要
- 

**Q893.** 您选择"... 因为它很健康"

您认为该陈述有多重要？

- 极其重要
  - 非常重要
  - 一般重要
  - 有点重要
  - 完全不重要
- 

**Q894.** 您选择"... 因为它准备起来很快"

您认为该陈述有多重要？

- 极其重要
  - 非常重要
  - 一般重要
  - 有点重要
  - 完全不重要
- 

**Q895.** 您选择"... 因为它的味道很好"

您认为该陈述有多重要？

- 极其重要
  - 非常重要
  - 一般重要
  - 有点重要
  - 完全不重要
-

**Q896.** 您选择"... 为了纵容自己"

您认为该陈述有多重要？

- 极其重要
  - 非常重要
  - 一般重要
  - 有点重要
  - 完全不重要
- 

**Q897.** 您选择"... 因为它是天然的（例如没有经过基因改造）"

您认为该陈述有多重要？

- 极其重要
  - 非常重要
  - 一般重要
  - 有点重要
  - 完全不重要
- 

**Q898.** 您选择"... 因为我不想再花更多的钱"

您认为该陈述有多重要？

- 极其重要
  - 非常重要
  - 一般重要
  - 有点重要
  - 完全不重要
- 

**Q899.** 您选择"... 因为它的卡路里很低"

您认为该陈述有多重要？

- 极其重要

- 非常重要
  - 一般重要
  - 有点重要
  - 完全不重要
- 

**Q900.** 您选择"... 因为我很沮丧"

您认为该陈述有多重要？

- 极其重要
  - 非常重要
  - 一般重要
  - 有点重要
  - 完全不重要
- 

**Q901.** 您选择"... 因为它让我在别人面前看起来很好"

您认为该陈述有多重要？

- 极其重要
  - 非常重要
  - 一般重要
  - 有点重要
  - 完全不重要
- 

**Q902.** 您选择"... 因为不吃它会不礼貌"

您认为该陈述有多重要？

- 极其重要
- 非常重要
- 一般重要
- 有点重要

完全不重要

---

**Q903.** 您选择"... 因为它的呈现方式很有吸引力 ( 例如包装 )"

您认为该陈述有多重要？

- 极其重要
  - 非常重要
  - 一般重要
  - 有点重要
  - 完全不重要
- 

**Q904.** 您选择"... 这样我就可以和其他人共度时光"

您认为该陈述有多重要？

- 极其重要
  - 非常重要
  - 一般重要
  - 有点重要
  - 完全不重要
- 

**Q905.** 您选择"... 因为它是有机的"

您认为该陈述有多重要？

- 极其重要
  - 非常重要
  - 一般重要
  - 有点重要
  - 完全不重要
- 

**Q906.** 您选择"... 因为我从小吃到大"

您认为该陈述有多重要？

- 极其重要
  - 非常重要
  - 一般重要
  - 有点重要
  - 完全不重要
- 

**Q907.** 您选择"... 因为吃它让我很享受"

您认为该陈述有多重要？

- 极其重要
  - 非常重要
  - 一般重要
  - 有点重要
  - 完全不重要
- 

**Q908.** 您选择"...因为我饿了"

您认为该陈述有多重要？

- 极其重要
  - 非常重要
  - 一般重要
  - 有点重要
  - 完全不重要
- 

**Q909.** 您选择"... 因为我经常吃它"

您认为该陈述有多重要？

- 极其重要
- 非常重要

- 一般重要
  - 有点重要
  - 完全不重要
- 

**Q910.** 您选择"... 因为我对它有食欲"

您认为该陈述有多重要？

- 极其重要
  - 非常重要
  - 一般重要
  - 有点重要
  - 完全不重要
- 

**Q911.** 您选择"... 因为它很容易准备"

您认为该陈述有多重要？

- 极其重要
  - 非常重要
  - 一般重要
  - 有点重要
  - 完全不重要
- 

**Q912.** 您选择"... 因为我很伤心"

您认为该陈述有多重要？

- 极其重要
- 非常重要
- 一般重要
- 有点重要
- 完全不重要



---

**Q913.** 您选择"... 因为脂肪含量低"

您认为该陈述有多重要？

- 极其重要
  - 非常重要
  - 一般重要
  - 有点重要
  - 完全不重要
- 

**Q914.** 您选择"... 因为我从广告或在电视上看过它"

您认为该陈述有多重要？

- 极其重要
  - 非常重要
  - 一般重要
  - 有点重要
  - 完全不重要
- 

**Q915.** 您选择"... 因为它使社交聚会更加舒适"

您认为该陈述有多重要？

- 极其重要
  - 非常重要
  - 一般重要
  - 有点重要
  - 完全不重要
- 

**Q916.** 您选择"... 因为我应该吃它"

您认为该陈述有多重要？

- 极其重要
  - 非常重要
  - 一般重要
  - 有点重要
  - 完全不重要
- 

**Q917.** 您选择"... 因为其他人喜欢它"

您认为该陈述有多重要？

- 极其重要
  - 非常重要
  - 一般重要
  - 有点重要
  - 完全不重要
- 

**Q918.** 您选择"... 因为我感到孤独"

您认为该陈述有多重要？

- 极其重要
  - 非常重要
  - 一般重要
  - 有点重要
  - 完全不重要
- 

**Q919.** 您选择"... 因为我关注我的体重"

您认为该陈述有多重要？

- 极其重要
- 非常重要
- 一般重要

- 有点重要
  - 完全不重要
- 

**Q920.** 您选择"... 因为它不含有害物质（例如杀虫剂，污染物，抗生素）"

您认为该陈述有多重要？

- 极其重要
  - 非常重要
  - 一般重要
  - 有点重要
  - 完全不重要
- 

**Q921.** 您选择"... 因为它最方便"

您认为该陈述有多重要？

- 极其重要
  - 非常重要
  - 一般重要
  - 有点重要
  - 完全不重要
- 

**Q922.** 您选择"... 因为我需要能量"

您认为该陈述有多重要？

- 极其重要
  - 非常重要
  - 一般重要
  - 有点重要
  - 完全不重要
-

**Q923.** 您选择"... 因为我熟悉它"

您认为该陈述有多重要？

- 极其重要
  - 非常重要
  - 一般重要
  - 有点重要
  - 完全不重要
- 

**Q924.** 您选择"... 因为我喜欢它"

您认为该陈述有多重要？

- 极其重要
  - 非常重要
  - 一般重要
  - 有点重要
  - 完全不重要
- 

**Q925.** 您选择"... 因为它能令我感到愉悦的饱腹感"

您认为该陈述有多重要？

- 极其重要
  - 非常重要
  - 一般重要
  - 有点重要
  - 完全不重要
- 

**Q926.** 您选择"... 为了奖励自己"

您认为该陈述有多重要？

- 极其重要

- 非常重要
  - 一般重要
  - 有点重要
  - 完全不重要
- 

**Q927.** 您选择"... 出于传统（例如家庭传统，特殊场合）"

您认为该陈述有多重要？

- 极其重要
  - 非常重要
  - 一般重要
  - 有点重要
  - 完全不重要
- 

**Q928.** 您选择"... 因为它适用于特定场合"

您认为该陈述有多重要？

- 极其重要
  - 非常重要
  - 一般重要
  - 有点重要
  - 完全不重要
- 

**Q929.** 您选择"... 保持均衡饮食"

您认为该陈述有多重要？

- 极其重要
- 非常重要
- 一般重要
- 有点重要

完全不重要

---

**Q930.** 您选择"... 因为它帮助我社交"

您认为该陈述有多重要？

- 极其重要
  - 非常重要
  - 一般重要
  - 有点重要
  - 完全不重要
- 

**Q931.** 您选择"... 因为它的价格不贵"

您认为该陈述有多重要？

- 极其重要
  - 非常重要
  - 一般重要
  - 有点重要
  - 完全不重要
- 

**Q932.** 您选择"... 因为它自然而然地吸引了我（吸引人的颜色）"

您认为该陈述有多重要？

- 极其重要
  - 非常重要
  - 一般重要
  - 有点重要
  - 完全不重要
- 

**Q933.** 您选择"... 避免让那些试图让我开心的人失望"

您认为该陈述有多重要？

- 极其重要
  - 非常重要
  - 一般重要
  - 有点重要
  - 完全不重要
- 

**Q934.** 您选择"... 因为它很新潮"

您认为该陈述有多重要？

- 极其重要
  - 非常重要
  - 一般重要
  - 有点重要
  - 完全不重要
- 

**Q935.** 您选择"... 因为它打折"

您认为该陈述有多重要？

- 极其重要
  - 非常重要
  - 一般重要
  - 有点重要
  - 完全不重要
- 

**Q936.** 您选择"... 因为它让我保持身材"

您认为该陈述有多重要？

- 极其重要
- 非常重要

- 一般重要
  - 有点重要
  - 完全不重要
- 

**Q937.** 您选择"... 因为这是唯一的选择"

您认为该陈述有多重要？

- 极其重要
  - 非常重要
  - 一般重要
  - 有点重要
  - 完全不重要
- 

**Q938.** 您选择"... 因为我想每天都吃它"

您认为该陈述有多重要？

- 极其重要
  - 非常重要
  - 一般重要
  - 有点重要
  - 完全不重要
- 

**Q939.** 请告诉我们您不吃麻球的原因（请选择所有适用的选项）

- 它不是我在那个时刻想吃的东西
- 它不适用于特定场合
- 它不足以填饱肚子
- 我绝不选它。我喜欢每天吃一样的食物
- 它不健康
- 这个食物让我感到伤心、孤单或沮丧



- 我不喜欢它看起来的样子
  - 吃它显得我很土
  - 我不应该吃它
  - 我不想纵容自己
  - 它不是有机的
  - 价格太高
  - 我不经常吃它
  - 有其他人在的时候我不吃它
  - 它卡路里太高
  - 我不认为它是一种零食
  - 它不方便
  - 它的分量大小不合适
  - 我最近刚吃过，我不想太经常吃同样的东西
  - 我不喜欢它
- 

**Q940.** 您选择“我不认为它是一种零食“

您认为该陈述有多重要？

- 极其重要
  - 非常重要
  - 一般重要
  - 有点重要
  - 完全不重要
- 

**Q941.** 您选择“我不喜欢它“

您认为该陈述有多重要？

- 极其重要
- 非常重要
- 一般重要

- 有点重要
  - 完全不重要
- 

**Q942.** 您选择”我不经常吃它“

您认为该陈述有多重要？

- 极其重要
  - 非常重要
  - 一般重要
  - 有点重要
  - 完全不重要
- 

**Q943.** 您选择”它的分量大小不合适“

您认为该陈述有多重要？

- 极其重要
  - 非常重要
  - 一般重要
  - 有点重要
  - 完全不重要
- 

**Q944.** 您选择”它不足以填饱肚子“

您认为该陈述有多重要？

- 极其重要
  - 非常重要
  - 一般重要
  - 有点重要
  - 完全不重要
-

**Q945.** 您选择”它不健康“

您认为该陈述有多重要？

- 极其重要
  - 非常重要
  - 一般重要
  - 有点重要
  - 完全不重要
- 

**Q946.** 您选择”它不方便“

您认为该陈述有多重要？

- 极其重要
  - 非常重要
  - 一般重要
  - 有点重要
  - 完全不重要
- 

**Q947.** 您选择”我不想纵容自己“

您认为该陈述有多重要？

- 极其重要
  - 非常重要
  - 一般重要
  - 有点重要
  - 完全不重要
- 

**Q948.** 您选择”它不适用于特定场合“

您认为该陈述有多重要？

- 极其重要

- 非常重要
  - 一般重要
  - 有点重要
  - 完全不重要
- 

**Q949.** 您选择”有其他人在的时候我不吃它“

您认为该陈述有多重要？

- 极其重要
  - 非常重要
  - 一般重要
  - 有点重要
  - 完全不重要
- 

**Q950.** 您选择”价格太高“

您认为该陈述有多重要？

- 极其重要
  - 非常重要
  - 一般重要
  - 有点重要
  - 完全不重要
- 

**Q951.** 您选择”我不喜欢它看起来的样子“

您认为该陈述有多重要？

- 极其重要
- 非常重要
- 一般重要
- 有点重要

完全不重要

---

**Q952.** 您选择”它卡路里太高“

您认为该陈述有多重要？

- 极其重要
  - 非常重要
  - 一般重要
  - 有点重要
  - 完全不重要
- 

**Q953.** 您选择”我不应该吃它“

您认为该陈述有多重要？

- 极其重要
  - 非常重要
  - 一般重要
  - 有点重要
  - 完全不重要
- 

**Q954.** 您选择”吃它显得我很土“

您认为该陈述有多重要？

- 极其重要
  - 非常重要
  - 一般重要
  - 有点重要
  - 完全不重要
- 

**Q955.** 您选择”它不是我在那个时刻想吃的东西“

您认为该陈述有多重要？

- 极其重要
  - 非常重要
  - 一般重要
  - 有点重要
  - 完全不重要
- 

**Q956.** 您选择”我最近刚吃过，我不想太经常吃同样的东西“

您认为该陈述有多重要？

- 极其重要
  - 非常重要
  - 一般重要
  - 有点重要
  - 完全不重要
- 

**Q957.** 您选择”我绝不选它。我喜欢每天吃一样的食物“

您认为该陈述有多重要？

- 极其重要
  - 非常重要
  - 一般重要
  - 有点重要
  - 完全不重要
- 

**Q958.** 您选择”这个食物让我感到伤心、孤单或沮丧“

您认为该陈述有多重要？

- 极其重要
- 非常重要

- 一般重要
  - 有点重要
  - 完全不重要
- 

**Q959.** 您选择”它不是有机的“  
您认为该陈述有多重要？

- 极其重要
  - 非常重要
  - 一般重要
  - 有点重要
  - 完全不重要
- 

## Reasons for Starchy food choices(Full RATA)

---

**Q1073.**  
您吃白米饭吗？

- 是的，我吃
  - 不是，我不吃
- 

**Q1074.**  
试回想您吃白米饭的原因。  
您认为以下陈述有多重要？  
”...因为我习惯吃它“

- 极其重要
- 非常重要
- 一般重要
- 有点重要
- 完全不重要

---

**Q1075.**

试回想您吃白米饭的原因。  
您认为以下陈述有多重要？

“...因为它很健康”

- 极其重要
  - 非常重要
  - 一般重要
  - 有点重要
  - 完全不重要
- 

**Q1076.**

试回想您吃白米饭的原因。  
您认为以下陈述有多重要？

“...因为它准备起来很快”

- 极其重要
  - 非常重要
  - 一般重要
  - 有点重要
  - 完全不重要
- 

**Q1077.**

试回想您吃白米饭的原因。  
您认为以下陈述有多重要？

“...因为它的味道很好”

- 极其重要
- 非常重要
- 一般重要
- 有点重要



完全不重要

---

**Q1078.**

试回想您吃白米饭的原因。

您认为以下陈述有多重要？

"...为了纵容自己"

- 极其重要
  - 非常重要
  - 一般重要
  - 有点重要
  - 完全不重要
- 

**Q1079.**

试回想您吃白米饭的原因。

您认为以下陈述有多重要？

"...因为它是天然的（例如没有经过基因改造）"

- 极其重要
  - 非常重要
  - 一般重要
  - 有点重要
  - 完全不重要
- 

**Q1080.**

试回想您吃白米饭的原因。

您认为以下陈述有多重要？

"...因为我不想再花更多的钱"

- 极其重要
- 非常重要

- 一般重要
  - 有点重要
  - 完全不重要
- 

**Q1081.**

试回想您吃白米饭的原因。  
您认为以下陈述有多重要？

”...因为它的卡路里很低“

- 极其重要
  - 非常重要
  - 一般重要
  - 有点重要
  - 完全不重要
- 

**Q1082.**

试回想您吃白米饭的原因。  
您认为以下陈述有多重要？

”...因为我很沮丧“

- 极其重要
  - 非常重要
  - 一般重要
  - 有点重要
  - 完全不重要
- 

**Q1083.**

试回想您吃白米饭的原因。  
您认为以下陈述有多重要？

”...因为它让我在别人面前看起来很好“

- 极其重要
  - 非常重要
  - 一般重要
  - 有点重要
  - 完全不重要
- 

**Q1084.**

试回想您吃白米饭的原因。  
您认为以下陈述有多重要？

”...因为不吃它会不礼貌“

- 极其重要
  - 非常重要
  - 一般重要
  - 有点重要
  - 完全不重要
- 

**Q1085.**

试回想您吃白米饭的原因。  
您认为以下陈述有多重要？

”...因为它的呈现方式很有吸引力（例如包装）“

- 极其重要
  - 非常重要
  - 一般重要
  - 有点重要
  - 完全不重要
- 

**Q1086.**

试回想您吃白米饭的原因。

您认为以下陈述有多重要？

”...这样我就可以和其他人共度时光“

- 极其重要
  - 非常重要
  - 一般重要
  - 有点重要
  - 完全不重要
- 

**Q1087.**

试回想您吃白米饭的原因。

您认为以下陈述有多重要？

”...因为它是机机的“

- 极其重要
  - 非常重要
  - 一般重要
  - 有点重要
  - 完全不重要
- 

**Q1088.**

试回想您吃白米饭的原因。

您认为以下陈述有多重要？

”...因为我从小吃到大“

- 极其重要
  - 非常重要
  - 一般重要
  - 有点重要
  - 完全不重要
-

**Q1089.**

试回想您吃白米饭的原因。  
您认为以下陈述有多重要？

"...因为吃它让我很享受"

- 极其重要
  - 非常重要
  - 一般重要
  - 有点重要
  - 完全不重要
- 

**Q1090.**

试回想您吃白米饭的原因。  
您认为以下陈述有多重要？

"...因为我饿了"

- 极其重要
  - 非常重要
  - 一般重要
  - 有点重要
  - 完全不重要
- 

**Q1091.**

试回想您吃白米饭的原因。  
您认为以下陈述有多重要？

"...因为我经常吃它"

- 极其重要
- 非常重要
- 一般重要
- 有点重要

完全不重要

---

**Q1092.**

试回想您吃白米饭的原因。

您认为以下陈述有多重要？

"...因为我对它有食欲"

- 极其重要
  - 非常重要
  - 一般重要
  - 有点重要
  - 完全不重要
- 

**Q1093.**

试回想您吃白米饭的原因。

您认为以下陈述有多重要？

"...因为它很容易准备"

- 极其重要
  - 非常重要
  - 一般重要
  - 有点重要
  - 完全不重要
- 

**Q1094.**

试回想您吃白米饭的原因。

您认为以下陈述有多重要？

"...因为我很伤心"

- 极其重要
- 非常重要

- 一般重要
  - 有点重要
  - 完全不重要
- 

**Q1095.**

试回想您吃白米饭的原因。  
您认为以下陈述有多重要？

"...因为脂肪含量低"

- 极其重要
  - 非常重要
  - 一般重要
  - 有点重要
  - 完全不重要
- 

**Q1096.**

试回想您吃白米饭的原因。  
您认为以下陈述有多重要？

"...因为我从广告或在电视上看过它"

- 极其重要
  - 非常重要
  - 一般重要
  - 有点重要
  - 完全不重要
- 

**Q1097.**

试回想您吃白米饭的原因。  
您认为以下陈述有多重要？

"...因为它使社交聚会更加舒适"

- 极其重要
  - 非常重要
  - 一般重要
  - 有点重要
  - 完全不重要
- 

**Q1098.**

试回想您吃白米饭的原因。  
您认为以下陈述有多重要？

"...因为我应该吃它"

- 极其重要
  - 非常重要
  - 一般重要
  - 有点重要
  - 完全不重要
- 

**Q1099.**

试回想您吃白米饭的原因。  
您认为以下陈述有多重要？

"...因为其他人喜欢它"

- 极其重要
  - 非常重要
  - 一般重要
  - 有点重要
  - 完全不重要
- 

**Q1100.**

试回想您吃白米饭的原因。



您认为以下陈述有多重要？

"...因为我感到孤独"

- 极其重要
  - 非常重要
  - 一般重要
  - 有点重要
  - 完全不重要
- 

**Q1101.**

试回想您吃白米饭的原因。

您认为以下陈述有多重要？

"...因为我关注我的体重"

- 极其重要
  - 非常重要
  - 一般重要
  - 有点重要
  - 完全不重要
- 

**Q1102.**

试回想您吃白米饭的原因。

您认为以下陈述有多重要？

"...因为它不含有害物质（例如杀虫剂，污染物，抗生素）"

- 极其重要
  - 非常重要
  - 一般重要
  - 有点重要
  - 完全不重要
-

**Q1103.**

试回想您吃白米饭的原因。  
您认为以下陈述有多重要？

"...因为它最方便"

- 极其重要
  - 非常重要
  - 一般重要
  - 有点重要
  - 完全不重要
- 

**Q1104.**

试回想您吃白米饭的原因。  
您认为以下陈述有多重要？

"...因为我需要能量"

- 极其重要
  - 非常重要
  - 一般重要
  - 有点重要
  - 完全不重要
- 

**Q1105.**

试回想您吃白米饭的原因。  
您认为以下陈述有多重要？

"...因为我熟悉它"

- 极其重要
- 非常重要
- 一般重要
- 有点重要

完全不重要

---

**Q1106.**

试回想您吃白米饭的原因。  
您认为以下陈述有多重要？

"...因为我喜欢它"

- 极其重要
  - 非常重要
  - 一般重要
  - 有点重要
  - 完全不重要
- 

**Q1107.**

试回想您吃白米饭的原因。  
您认为以下陈述有多重要？

"...因为它能令我感到愉悦的饱腹感"

- 极其重要
  - 非常重要
  - 一般重要
  - 有点重要
  - 完全不重要
- 

**Q1108.**

试回想您吃白米饭的原因。  
您认为以下陈述有多重要？

"...为了奖励自己"

- 极其重要
- 非常重要

- 一般重要
  - 有点重要
  - 完全不重要
- 

**Q1109.**

试回想您吃白米饭的原因。

您认为以下陈述有多重要？

"...出于传统（例如家庭传统，特殊场合）"

- 极其重要
  - 非常重要
  - 一般重要
  - 有点重要
  - 完全不重要
- 

**Q1110.**

试回想您吃白米饭的原因。

您认为以下陈述有多重要？

"...因为它适用于特定场合"

- 极其重要
  - 非常重要
  - 一般重要
  - 有点重要
  - 完全不重要
- 

**Q1111.**

试回想您吃白米饭的原因。

您认为以下陈述有多重要？

"...保持均衡饮食"

- 极其重要
  - 非常重要
  - 一般重要
  - 有点重要
  - 完全不重要
- 

**Q1112.**

试回想您吃白米饭的原因。  
您认为以下陈述有多重要？

"...因为它的社交性"

- 极其重要
  - 非常重要
  - 一般重要
  - 有点重要
  - 完全不重要
- 

**Q1113.**

试回想您吃白米饭的原因。  
您认为以下陈述有多重要？

"...因为它的价格不贵"

- 极其重要
  - 非常重要
  - 一般重要
  - 有点重要
  - 完全不重要
- 

**Q1114.**

试回想您吃白米饭的原因。

您认为以下陈述有多重要？

"...因为它自然而然地吸引了我（吸引人的颜色）"

- 极其重要
  - 非常重要
  - 一般重要
  - 有点重要
  - 完全不重要
- 

**Q1115.**

试回想您吃白米饭的原因。

您认为以下陈述有多重要？

"...避免让那些试图让我开心的人失望"

- 极其重要
  - 非常重要
  - 一般重要
  - 有点重要
  - 完全不重要
- 

**Q1116.**

试回想您吃白米饭的原因。

您认为以下陈述有多重要？

"...因为它很新潮"

- 极其重要
  - 非常重要
  - 一般重要
  - 有点重要
  - 完全不重要
-

**Q1117.**

试回想您吃白米饭的原因。  
您认为以下陈述有多重要？

"...因为它打折"

- 极其重要
  - 非常重要
  - 一般重要
  - 有点重要
  - 完全不重要
- 

**Q1118.**

试回想您吃白米饭的原因。  
您认为以下陈述有多重要？

"...因为它让我保持身材"

- 极其重要
  - 非常重要
  - 一般重要
  - 有点重要
  - 完全不重要
- 

**Q1119.**

试回想您吃白米饭的原因。  
您认为以下陈述有多重要？

"...因为这是唯一的选择"

- 极其重要
- 非常重要
- 一般重要
- 有点重要

完全不重要

---

**Q1120.**

试回想您吃白米饭的原因。  
您认为以下陈述有多重要？

"...因为我想每天都吃它"

- 极其重要
  - 非常重要
  - 一般重要
  - 有点重要
  - 完全不重要
- 

**Q1121.**

试回想您不吃白米饭的原因。  
您认为以下陈述有多重要？

"我不认为它是一种零食"

- 极其重要
  - 非常重要
  - 一般重要
  - 有点重要
  - 完全不重要
- 

**Q1122.**

试回想您不吃白米饭的原因。  
您认为以下陈述有多重要？

"我不喜欢它"

- 极其重要
- 非常重要
- 一般重要



- 有点重要
  - 完全不重要
- 

**Q1123.**

试回想您不吃白米饭的原因。  
您认为以下陈述有多重要？

“我不经常吃它”

- 极其重要
  - 非常重要
  - 一般重要
  - 有点重要
  - 完全不重要
- 

**Q1124.**

试回想您不吃白米饭的原因。  
您认为以下陈述有多重要？

“它的分量大小不合适”

- 极其重要
  - 非常重要
  - 一般重要
  - 有点重要
  - 完全不重要
- 

**Q1125.**

试回想您不吃白米饭的原因。  
您认为以下陈述有多重要？

“它不足以填饱肚子”

- 极其重要
- 非常重要

- 一般重要
  - 有点重要
  - 完全不重要
- 

**Q1126.**

试回想您不吃白米饭的原因。

您认为以下陈述有多重要？

“它不健康”

- 极其重要
  - 非常重要
  - 一般重要
  - 有点重要
  - 完全不重要
- 

**Q1127.**

试回想您不吃白米饭的原因。

您认为以下陈述有多重要？

“它不方便”

- 极其重要
  - 非常重要
  - 一般重要
  - 有点重要
  - 完全不重要
- 

**Q1128.**

试回想您不吃白米饭的原因。

您认为以下陈述有多重要？

“我不想纵容自己”

- 极其重要

- 非常重要
  - 一般重要
  - 有点重要
  - 完全不重要
- 

**Q1129.**

试回想您不吃白米饭的原因。

您认为以下陈述有多重要？

“它不适用于特定场合”

- 极其重要
  - 非常重要
  - 一般重要
  - 有点重要
  - 完全不重要
- 

**Q1130.**

试回想您不吃白米饭的原因。

您认为以下陈述有多重要？

“有其他人在的时候我不吃它”

- 极其重要
  - 非常重要
  - 一般重要
  - 有点重要
  - 完全不重要
- 

**Q1131.**

试回想您不吃白米饭的原因。

您认为以下陈述有多重要？

“价格太高”

- 极其重要
  - 非常重要
  - 一般重要
  - 有点重要
  - 完全不重要
- 

**Q1132.**

试回想您不吃白米饭的原因。

您认为以下陈述有多重要？

“我不喜欢它看起来的样子“

- 极其重要
  - 非常重要
  - 一般重要
  - 有点重要
  - 完全不重要
- 

**Q1133.**

试回想您不吃白米饭的原因。

您认为以下陈述有多重要？

“它卡路里太高“

- 极其重要
  - 非常重要
  - 一般重要
  - 有点重要
  - 完全不重要
- 

**Q1134.**

试回想您不吃白米饭的原因。

您认为以下陈述有多重要？

“我不应该吃它（例如出于文化、宗教习俗）”

- 极其重要
  - 非常重要
  - 一般重要
  - 有点重要
  - 完全不重要
- 

### Q1135.

试回想您不吃白米饭的原因。

您认为以下陈述有多重要？

“吃它显得我很土”

- 极其重要
  - 非常重要
  - 一般重要
  - 有点重要
  - 完全不重要
- 

### Q1136.

试回想您不吃白米饭的原因。

您认为以下陈述有多重要？

“它不是我在那个时刻想吃的东西”

- 极其重要
  - 非常重要
  - 一般重要
  - 有点重要
  - 完全不重要
- 

### Q1137.

试回想您不吃白米饭的原因。

您认为以下陈述有多重要？

“我最近刚吃过， 我不想太经常吃同样的东西 ”

- 极其重要
  - 非常重要
  - 一般重要
  - 有点重要
  - 完全不重要
- 

**Q1138.**

试回想您不吃白米饭的原因。

您认为以下陈述有多重要？

“我绝不选它。 我喜欢每天吃一样的食物 ”

- 极其重要
  - 非常重要
  - 一般重要
  - 有点重要
  - 完全不重要
- 

**Q1139.**

试回想您不吃白米饭的原因。

您认为以下陈述有多重要？

“这个食物让我感到伤心、孤单或沮丧 ”

- 极其重要
  - 非常重要
  - 一般重要
  - 有点重要
  - 完全不重要
-

**Q1140.**

试回想您不吃白米饭的原因。

您认为以下陈述有多重要？

“它不是有机的”

- 极其重要
  - 非常重要
  - 一般重要
  - 有点重要
  - 完全不重要
- 

**Reasons for Protein foods Choices(Full RATA)**

---

**Q1005.**

您吃红烧肉吗？

- 是的，我吃
  - 不是，我不吃
- 

**Q1006.**

试回想您吃红烧肉的原因。

您认为以下陈述有多重要？

“...因为我习惯吃它”

- 极其重要
  - 非常重要
  - 一般重要
  - 有点重要
  - 完全不重要
- 

**Q1007.**

试回想您吃红烧肉的原因。  
您认为以下陈述有多重要？

"...因为它很健康"

- 极其重要
  - 非常重要
  - 一般重要
  - 有点重要
  - 完全不重要
- 

### Q1008.

试回想您吃红烧肉的原因。  
您认为以下陈述有多重要？

"...因为它准备起来很快"

- 极其重要
  - 非常重要
  - 一般重要
  - 有点重要
  - 完全不重要
- 

### Q1009.

试回想您吃红烧肉的原因。  
您认为以下陈述有多重要？

"...因为它的味道很好"

- 极其重要
  - 非常重要
  - 一般重要
  - 有点重要
  - 完全不重要
-



**Q1010.**

试回想您吃红烧肉的原因。  
您认为以下陈述有多重要？

"...为了纵容自己"

- 极其重要
  - 非常重要
  - 一般重要
  - 有点重要
  - 完全不重要
- 

**Q1011.**

试回想您吃红烧肉的原因。  
您认为以下陈述有多重要？

"...因为它是天然的（例如没有经过基因改造）"

- 极其重要
  - 非常重要
  - 一般重要
  - 有点重要
  - 完全不重要
- 

**Q1012.**

试回想您吃红烧肉的原因。  
您认为以下陈述有多重要？

"...因为我不想再花更多的钱"

- 极其重要
- 非常重要
- 一般重要
- 有点重要
- 完全不重要

---

**Q1013.**

试回想您吃红烧肉的原因。  
您认为以下陈述有多重要？

”...因为它的卡路里很低“

- 极其重要
  - 非常重要
  - 一般重要
  - 有点重要
  - 完全不重要
- 

**Q1014.**

试回想您吃红烧肉的原因。  
您认为以下陈述有多重要？

”...因为我很沮丧“

- 极其重要
  - 非常重要
  - 一般重要
  - 有点重要
  - 完全不重要
- 

**Q1015.**

试回想您吃红烧肉的原因。  
您认为以下陈述有多重要？

”...因为它让我在别人面前看起来很好“

- 极其重要
- 非常重要
- 一般重要

- 有点重要
  - 完全不重要
- 

**Q1016.**

试回想您吃红烧肉的原因。  
您认为以下陈述有多重要？

”...因为不吃它会不礼貌“

- 极其重要
  - 非常重要
  - 一般重要
  - 有点重要
  - 完全不重要
- 

**Q1017.**

试回想您吃红烧肉的原因。  
您认为以下陈述有多重要？

”...因为它的呈现方式很有吸引力（例如包装）“

- 极其重要
  - 非常重要
  - 一般重要
  - 有点重要
  - 完全不重要
- 

**Q1018.**

试回想您吃红烧肉的原因。  
您认为以下陈述有多重要？

”...这样我就可以和其他人共度时光“

- 极其重要

- 非常重要
  - 一般重要
  - 有点重要
  - 完全不重要
- 

**Q1019.**

试回想您吃红烧肉的原因。  
您认为以下陈述有多重要？

”...因为它是有机的“

- 极其重要
  - 非常重要
  - 一般重要
  - 有点重要
  - 完全不重要
- 

**Q1020.**

试回想您吃红烧肉的原因。  
您认为以下陈述有多重要？

”...因为我从小吃到大“

- 极其重要
  - 非常重要
  - 一般重要
  - 有点重要
  - 完全不重要
- 

**Q1021.**

试回想您吃红烧肉的原因。  
您认为以下陈述有多重要？

"...因为吃它让我很享受"

- 极其重要
  - 非常重要
  - 一般重要
  - 有点重要
  - 完全不重要
- 

### Q1022.

试回想您吃红烧肉的原因。  
您认为以下陈述有多重要？

"...因为我饿了"

- 极其重要
  - 非常重要
  - 一般重要
  - 有点重要
  - 完全不重要
- 

### Q1023.

试回想您吃红烧肉的原因。  
您认为以下陈述有多重要？

"...因为我经常吃它"

- 极其重要
  - 非常重要
  - 一般重要
  - 有点重要
  - 完全不重要
- 

### Q1024.

试回想您吃红烧肉的原因。  
您认为以下陈述有多重要？  
"...因为我对它有食欲"

- 极其重要
  - 非常重要
  - 一般重要
  - 有点重要
  - 完全不重要
- 

### Q1025.

试回想您吃红烧肉的原因。  
您认为以下陈述有多重要？  
"...因为它很容易准备"

- 极其重要
  - 非常重要
  - 一般重要
  - 有点重要
  - 完全不重要
- 

### Q1026.

试回想您吃红烧肉的原因。  
您认为以下陈述有多重要？  
"...因为我很伤心"

- 极其重要
  - 非常重要
  - 一般重要
  - 有点重要
  - 完全不重要
-

**Q1027.**

试回想您吃红烧肉的原因。  
您认为以下陈述有多重要？

"...因为脂肪含量低"

- 极其重要
  - 非常重要
  - 一般重要
  - 有点重要
  - 完全不重要
- 

**Q1028.**

试回想您吃红烧肉的原因。  
您认为以下陈述有多重要？

"...因为我从广告或在电视上看过它"

- 极其重要
  - 非常重要
  - 一般重要
  - 有点重要
  - 完全不重要
- 

**Q1029.**

试回想您吃红烧肉的原因。  
您认为以下陈述有多重要？

"...因为它使社交聚会更加舒适"

- 极其重要
- 非常重要
- 一般重要
- 有点重要

完全不重要

---

**Q1030.**

试回想您吃红烧肉的原因。  
您认为以下陈述有多重要？

"...因为我应该吃它"

- 极其重要
  - 非常重要
  - 一般重要
  - 有点重要
  - 完全不重要
- 

**Q1031.**

试回想您吃红烧肉的原因。  
您认为以下陈述有多重要？

"...因为其他人喜欢它"

- 极其重要
  - 非常重要
  - 一般重要
  - 有点重要
  - 完全不重要
- 

**Q1032.**

试回想您吃红烧肉的原因。  
您认为以下陈述有多重要？

"...因为我感到孤独"

- 极其重要
- 非常重要



- 一般重要
  - 有点重要
  - 完全不重要
- 

**Q1033.**

试回想您吃红烧肉的原因。  
您认为以下陈述有多重要？

"...因为我关注我的体重"

- 极其重要
  - 非常重要
  - 一般重要
  - 有点重要
  - 完全不重要
- 

**Q1034.**

试回想您吃红烧肉的原因。  
您认为以下陈述有多重要？

"...因为它不含有害物质（例如杀虫剂，污染物，抗生素）"

- 极其重要
  - 非常重要
  - 一般重要
  - 有点重要
  - 完全不重要
- 

**Q1035.**

试回想您吃红烧肉的原因。  
您认为以下陈述有多重要？

"...因为它最方便"

- 极其重要
  - 非常重要
  - 一般重要
  - 有点重要
  - 完全不重要
- 

**Q1036.**

试回想您吃红烧肉的原因。  
您认为以下陈述有多重要？

"...因为我需要能量"

- 极其重要
  - 非常重要
  - 一般重要
  - 有点重要
  - 完全不重要
- 

**Q1037.**

试回想您吃红烧肉的原因。  
您认为以下陈述有多重要？

"...因为我熟悉它"

- 极其重要
  - 非常重要
  - 一般重要
  - 有点重要
  - 完全不重要
- 

**Q1038.**

试回想您吃红烧肉的原因。

您认为以下陈述有多重要？

"...因为我喜欢它"

- 极其重要
  - 非常重要
  - 一般重要
  - 有点重要
  - 完全不重要
- 

**Q1039.**

试回想您吃红烧肉的原因。

您认为以下陈述有多重要？

"...因为它能令我感到愉悦的饱腹感"

- 极其重要
  - 非常重要
  - 一般重要
  - 有点重要
  - 完全不重要
- 

**Q1040.**

试回想您吃红烧肉的原因。

您认为以下陈述有多重要？

"...为了奖励自己"

- 极其重要
  - 非常重要
  - 一般重要
  - 有点重要
  - 完全不重要
-

**Q1041.**

试回想您吃红烧肉的原因。

您认为以下陈述有多重要？

"...出于传统（例如家庭传统，特殊场合）"

- 极其重要
  - 非常重要
  - 一般重要
  - 有点重要
  - 完全不重要
- 

**Q1042.**

试回想您吃红烧肉的原因。

您认为以下陈述有多重要？

"...因为它适用于特定场合"

- 极其重要
  - 非常重要
  - 一般重要
  - 有点重要
  - 完全不重要
- 

**Q1043.**

试回想您吃红烧肉的原因。

您认为以下陈述有多重要？

"...保持均衡饮食"

- 极其重要
- 非常重要
- 一般重要
- 有点重要

完全不重要

---

**Q1044.**

试回想您吃红烧肉的原因。  
您认为以下陈述有多重要？

"...因为它的社交性"

- 极其重要
  - 非常重要
  - 一般重要
  - 有点重要
  - 完全不重要
- 

**Q1045.**

试回想您吃红烧肉的原因。  
您认为以下陈述有多重要？

"...因为它的价格不贵"

- 极其重要
  - 非常重要
  - 一般重要
  - 有点重要
  - 完全不重要
- 

**Q1046.**

试回想您吃红烧肉的原因。  
您认为以下陈述有多重要？

"...因为它自然而然地吸引了我（吸引人的颜色）"

- 极其重要
- 非常重要

- 一般重要
  - 有点重要
  - 完全不重要
- 

**Q1047.**

试回想您吃红烧肉的原因。  
您认为以下陈述有多重要？

"...避免让那些试图让我开心的人失望"

- 极其重要
  - 非常重要
  - 一般重要
  - 有点重要
  - 完全不重要
- 

**Q1048.**

试回想您吃红烧肉的原因。  
您认为以下陈述有多重要？

"...因为它很新潮"

- 极其重要
  - 非常重要
  - 一般重要
  - 有点重要
  - 完全不重要
- 

**Q1049.**

试回想您吃红烧肉的原因。  
您认为以下陈述有多重要？

"...因为它打折"

- 极其重要
  - 非常重要
  - 一般重要
  - 有点重要
  - 完全不重要
- 

**Q1050.**

试回想您吃红烧肉的原因。  
您认为以下陈述有多重要？

"...因为它让我保持身材"

- 极其重要
  - 非常重要
  - 一般重要
  - 有点重要
  - 完全不重要
- 

**Q1051.**

试回想您吃红烧肉的原因。  
您认为以下陈述有多重要？

"...因为这是唯一的选择"

- 极其重要
  - 非常重要
  - 一般重要
  - 有点重要
  - 完全不重要
- 

**Q1052.**

试回想您吃红烧肉的原因。

您认为以下陈述有多重要？

"...因为我想每天都吃它"

- 极其重要
  - 非常重要
  - 一般重要
  - 有点重要
  - 完全不重要
- 

**Q1053.**

试回想您不吃红烧肉的原因。

您认为以下陈述有多重要？

"我不认为它是一种零食"

- 极其重要
  - 非常重要
  - 一般重要
  - 有点重要
  - 完全不重要
- 

**Q1054.**

试回想您不吃红烧肉的原因。

您认为以下陈述有多重要？

"我不喜欢它"

- 极其重要
  - 非常重要
  - 一般重要
  - 有点重要
  - 完全不重要
- 

**Q1055.**



试回想您不吃红烧肉的原因。

您认为以下陈述有多重要？

“我不经常吃它“

- 极其重要
  - 非常重要
  - 一般重要
  - 有点重要
  - 完全不重要
- 

### Q1056.

试回想您不吃红烧肉的原因。

您认为以下陈述有多重要？

“它的分量大小不合适“

- 极其重要
  - 非常重要
  - 一般重要
  - 有点重要
  - 完全不重要
- 

### Q1057.

试回想您不吃红烧肉的原因。

您认为以下陈述有多重要？

“它不足以填饱肚子“

- 极其重要
  - 非常重要
  - 一般重要
  - 有点重要
  - 完全不重要
-

**Q1058.**

试回想您不吃红烧肉的原因。

您认为以下陈述有多重要？

“它不健康“

- 极其重要
  - 非常重要
  - 一般重要
  - 有点重要
  - 完全不重要
- 

**Q1059.**

试回想您不吃红烧肉的原因。

您认为以下陈述有多重要？

“它不方便“

- 极其重要
  - 非常重要
  - 一般重要
  - 有点重要
  - 完全不重要
- 

**Q1060.**

试回想您不吃红烧肉的原因。

您认为以下陈述有多重要？

“我不想纵容自己“

- 极其重要
- 非常重要
- 一般重要
- 有点重要
- 完全不重要

---

**Q1061.**

试回想您不吃红烧肉的原因。

您认为以下陈述有多重要？

“它不适用于特定场合”

- 极其重要
  - 非常重要
  - 一般重要
  - 有点重要
  - 完全不重要
- 

**Q1062.**

试回想您不吃红烧肉的原因。

您认为以下陈述有多重要？

“有其他人在的时候我不吃它”

- 极其重要
  - 非常重要
  - 一般重要
  - 有点重要
  - 完全不重要
- 

**Q1063.**

试回想您不吃红烧肉的原因。

您认为以下陈述有多重要？

“价格太高”

- 极其重要
- 非常重要
- 一般重要
- 有点重要
- 完全不重要

---

**Q1064.**

试回想您不吃红烧肉的原因。

您认为以下陈述有多重要？

“我不喜欢它看起来的样子“

- 极其重要
  - 非常重要
  - 一般重要
  - 有点重要
  - 完全不重要
- 

**Q1065.**

试回想您不吃红烧肉的原因。

您认为以下陈述有多重要？

“它卡路里太高“

- 极其重要
  - 非常重要
  - 一般重要
  - 有点重要
  - 完全不重要
- 

**Q1066.**

试回想您不吃红烧肉的原因。

您认为以下陈述有多重要？

“我不应该吃它（例如出于文化、宗教习俗）“

- 极其重要
- 非常重要
- 一般重要
- 有点重要

完全不重要

---

**Q1067.**

试回想您不吃红烧肉的原因。

您认为以下陈述有多重要？

“吃它显得我很土”

- 极其重要
  - 非常重要
  - 一般重要
  - 有点重要
  - 完全不重要
- 

**Q1068.**

试回想您不吃红烧肉的原因。

您认为以下陈述有多重要？

“它不是我在那个时刻想吃的东西”

- 极其重要
  - 非常重要
  - 一般重要
  - 有点重要
  - 完全不重要
- 

**Q1069.**

试回想您不吃红烧肉的原因。

您认为以下陈述有多重要？

“我最近刚吃过， 我不想太经常吃同样的东西”

- 极其重要
- 非常重要
- 一般重要

- 有点重要
  - 完全不重要
- 

**Q1070.**

试回想您不吃红烧肉的原因。  
您认为以下陈述有多重要？

“我绝不选它。我喜欢每天吃一样的食物”

- 极其重要
  - 非常重要
  - 一般重要
  - 有点重要
  - 完全不重要
- 

**Q1071.**

试回想您不吃红烧肉的原因。  
您认为以下陈述有多重要？

“这个食物让我感到伤心、孤单或沮丧”

- 极其重要
  - 非常重要
  - 一般重要
  - 有点重要
  - 完全不重要
- 

**Q1072.**

试回想您不吃红烧肉的原因。  
您认为以下陈述有多重要？

“它不是有机的”

- 极其重要

- 非常重要
  - 一般重要
  - 有点重要
  - 完全不重要
- 

## Reasons for Dairy Food Choices(Full RATA)

---

Q1141.

您吃豆浆吗？

- 是的，我吃
  - 不是，我不吃
- 

Q1142.

试回想您吃豆浆的原因。

您认为以下陈述有多重要？

“...因为我习惯吃它”

- 极其重要
  - 非常重要
  - 一般重要
  - 有点重要
  - 完全不重要
- 

Q1143.

试回想您吃豆浆的原因。

您认为以下陈述有多重要？

“...因为它很健康”

- 极其重要
- 非常重要

- 一般重要
  - 有点重要
  - 完全不重要
- 

**Q1144.**

试回想您吃豆浆的原因。

您认为以下陈述有多重要？

"...因为它准备起来很快"

- 极其重要
  - 非常重要
  - 一般重要
  - 有点重要
  - 完全不重要
- 

**Q1145.**

试回想您吃豆浆的原因。

您认为以下陈述有多重要？

"...因为它的味道很好"

- 极其重要
  - 非常重要
  - 一般重要
  - 有点重要
  - 完全不重要
- 

**Q1146.**

试回想您吃豆浆的原因。

您认为以下陈述有多重要？

"...为了纵容自己"

- 极其重要



- 非常重要
  - 一般重要
  - 有点重要
  - 完全不重要
- 

**Q1147.**

试回想您吃豆浆的原因。

您认为以下陈述有多重要？

“...因为它是天然的（例如没有经过基因改造）”

- 极其重要
  - 非常重要
  - 一般重要
  - 有点重要
  - 完全不重要
- 

**Q1148.**

试回想您吃豆浆的原因。

您认为以下陈述有多重要？

“...因为我不想再花更多的钱”

- 极其重要
  - 非常重要
  - 一般重要
  - 有点重要
  - 完全不重要
- 

**Q1149.**

试回想您吃豆浆的原因。

您认为以下陈述有多重要？

”...因为它的卡路里很低“

- 极其重要
  - 非常重要
  - 一般重要
  - 有点重要
  - 完全不重要
- 

### Q1150.

试回想您吃豆浆的原因。

您认为以下陈述有多重要？

”...因为我很沮丧“

- 极其重要
  - 非常重要
  - 一般重要
  - 有点重要
  - 完全不重要
- 

### Q1151.

试回想您吃豆浆的原因。

您认为以下陈述有多重要？

”...因为它让我在别人面前看起来很好“

- 极其重要
  - 非常重要
  - 一般重要
  - 有点重要
  - 完全不重要
- 

### Q1152.

试回想您吃豆浆的原因。  
您认为以下陈述有多重要？

”...因为不吃它会不礼貌“

- 极其重要
  - 非常重要
  - 一般重要
  - 有点重要
  - 完全不重要
- 

### Q1153.

试回想您吃豆浆的原因。  
您认为以下陈述有多重要？

”...因为它的呈现方式很有吸引力（例如包装）“

- 极其重要
  - 非常重要
  - 一般重要
  - 有点重要
  - 完全不重要
- 

### Q1154.

试回想您吃豆浆的原因。  
您认为以下陈述有多重要？

”...这样我就可以和其他人共度时光“

- 极其重要
- 非常重要
- 一般重要
- 有点重要
- 完全不重要

**Q1155.**

试回想您吃豆浆的原因。  
您认为以下陈述有多重要？

”...因为它是有机“

- 极其重要
  - 非常重要
  - 一般重要
  - 有点重要
  - 完全不重要
- 

**Q1156.**

试回想您吃豆浆的原因。  
您认为以下陈述有多重要？

”...因为我从小吃到大“

- 极其重要
  - 非常重要
  - 一般重要
  - 有点重要
  - 完全不重要
- 

**Q1157.**

试回想您吃豆浆的原因。  
您认为以下陈述有多重要？

”...因为吃它让我很享受“

- 极其重要
- 非常重要
- 一般重要
- 有点重要

完全不重要

---

**Q1158.**

试回想您吃豆浆的原因。  
您认为以下陈述有多重要？

"...因为我饿了"

- 极其重要
  - 非常重要
  - 一般重要
  - 有点重要
  - 完全不重要
- 

**Q1159.**

试回想您吃豆浆的原因。  
您认为以下陈述有多重要？

"...因为我经常吃它"

- 极其重要
  - 非常重要
  - 一般重要
  - 有点重要
  - 完全不重要
- 

**Q1160.**

试回想您吃豆浆的原因。  
您认为以下陈述有多重要？

"...因为我对它有食欲"

- 极其重要
- 非常重要

- 一般重要
  - 有点重要
  - 完全不重要
- 

**Q1161.**

试回想您吃豆浆的原因。  
您认为以下陈述有多重要？

"...因为它很容易准备"

- 极其重要
  - 非常重要
  - 一般重要
  - 有点重要
  - 完全不重要
- 

**Q1162.**

试回想您吃豆浆的原因。  
您认为以下陈述有多重要？

"...因为我很伤心"

- 极其重要
  - 非常重要
  - 一般重要
  - 有点重要
  - 完全不重要
- 

**Q1163.**

试回想您吃豆浆的原因。  
您认为以下陈述有多重要？

"...因为脂肪含量低"

- 极其重要
  - 非常重要
  - 一般重要
  - 有点重要
  - 完全不重要
- 

**Q1164.**

试回想您吃豆浆的原因。  
您认为以下陈述有多重要？

"...因为我从广告或在电视上看过它"

- 极其重要
  - 非常重要
  - 一般重要
  - 有点重要
  - 完全不重要
- 

**Q1165.**

试回想您吃豆浆的原因。  
您认为以下陈述有多重要？

"...因为它使社交聚会更加舒适"

- 极其重要
  - 非常重要
  - 一般重要
  - 有点重要
  - 完全不重要
- 

**Q1166.**

试回想您吃豆浆的原因。

您认为以下陈述有多重要？

"...因为我应该吃它"

- 极其重要
  - 非常重要
  - 一般重要
  - 有点重要
  - 完全不重要
- 

**Q1167.**

试回想您吃豆浆的原因。

您认为以下陈述有多重要？

"...因为其他人喜欢它"

- 极其重要
  - 非常重要
  - 一般重要
  - 有点重要
  - 完全不重要
- 

**Q1168.**

试回想您吃豆浆的原因。

您认为以下陈述有多重要？

"...因为我感到孤独"

- 极其重要
  - 非常重要
  - 一般重要
  - 有点重要
  - 完全不重要
-



**Q1169.**

试回想您吃豆浆的原因。  
您认为以下陈述有多重要？

"...因为我关注我的体重"

- 极其重要
  - 非常重要
  - 一般重要
  - 有点重要
  - 完全不重要
- 

**Q1170.**

试回想您吃豆浆的原因。  
您认为以下陈述有多重要？

"...因为它不含有害物质（例如杀虫剂，污染物，抗生素）"

- 极其重要
  - 非常重要
  - 一般重要
  - 有点重要
  - 完全不重要
- 

**Q1171.**

试回想您吃豆浆的原因。  
您认为以下陈述有多重要？

"...因为它最方便"

- 极其重要
- 非常重要
- 一般重要
- 有点重要

完全不重要

---

**Q1172.**

试回想您吃豆浆的原因。  
您认为以下陈述有多重要？

"...因为我需要能量"

- 极其重要
  - 非常重要
  - 一般重要
  - 有点重要
  - 完全不重要
- 

**Q1173.**

试回想您吃豆浆的原因。  
您认为以下陈述有多重要？

"...因为我熟悉它"

- 极其重要
  - 非常重要
  - 一般重要
  - 有点重要
  - 完全不重要
- 

**Q1174.**

试回想您吃豆浆的原因。  
您认为以下陈述有多重要？

"...因为我喜欢它"

- 极其重要
- 非常重要

- 一般重要
  - 有点重要
  - 完全不重要
- 

**Q1175.**

试回想您吃豆浆的原因。  
您认为以下陈述有多重要？

"...因为它能令我感到愉悦的饱腹感"

- 极其重要
  - 非常重要
  - 一般重要
  - 有点重要
  - 完全不重要
- 

**Q1176.**

试回想您吃豆浆的原因。  
您认为以下陈述有多重要？

"...为了奖励自己"

- 极其重要
  - 非常重要
  - 一般重要
  - 有点重要
  - 完全不重要
- 

**Q1177.**

试回想您吃豆浆的原因。  
您认为以下陈述有多重要？

"...出于传统（例如家庭传统，特殊场合）"

- 极其重要
  - 非常重要
  - 一般重要
  - 有点重要
  - 完全不重要
- 

**Q1178.**

试回想您吃豆浆的原因。  
您认为以下陈述有多重要？

"...因为它适用于特定场合"

- 极其重要
  - 非常重要
  - 一般重要
  - 有点重要
  - 完全不重要
- 

**Q1179.**

试回想您吃豆浆的原因。  
您认为以下陈述有多重要？

"...保持均衡饮食"

- 极其重要
  - 非常重要
  - 一般重要
  - 有点重要
  - 完全不重要
- 

**Q1180.**

试回想您吃豆浆的原因。

您认为以下陈述有多重要？

"...因为它的社交性"

- 极其重要
  - 非常重要
  - 一般重要
  - 有点重要
  - 完全不重要
- 

**Q1181.**

试回想您吃豆浆的原因。

您认为以下陈述有多重要？

"...因为它的价格不贵"

- 极其重要
  - 非常重要
  - 一般重要
  - 有点重要
  - 完全不重要
- 

**Q1182.**

试回想您吃豆浆的原因。

您认为以下陈述有多重要？

"...因为它自然而然地吸引了我（吸引人的颜色）"

- 极其重要
  - 非常重要
  - 一般重要
  - 有点重要
  - 完全不重要
-

**Q1183.**

试回想您吃豆浆的原因。

您认为以下陈述有多重要？

"...避免让那些试图让我开心的人失望"

- 极其重要
  - 非常重要
  - 一般重要
  - 有点重要
  - 完全不重要
- 

**Q1184.**

试回想您吃豆浆的原因。

您认为以下陈述有多重要？

"...因为它很新潮"

- 极其重要
  - 非常重要
  - 一般重要
  - 有点重要
  - 完全不重要
- 

**Q1185.**

试回想您吃豆浆的原因。

您认为以下陈述有多重要？

"...因为它打折"

- 极其重要
- 非常重要
- 一般重要
- 有点重要

完全不重要

---

**Q1186.**

试回想您吃豆浆的原因。  
您认为以下陈述有多重要？

"...因为它让我保持身材"

- 极其重要
  - 非常重要
  - 一般重要
  - 有点重要
  - 完全不重要
- 

**Q1187.**

试回想您吃豆浆的原因。  
您认为以下陈述有多重要？

"...因为这是唯一的选择"

- 极其重要
  - 非常重要
  - 一般重要
  - 有点重要
  - 完全不重要
- 

**Q1188.**

试回想您吃豆浆的原因。  
您认为以下陈述有多重要？

"...因为我想每天都吃它"

- 极其重要
- 非常重要

- 一般重要
  - 有点重要
  - 完全不重要
- 

**Q1189.**

试回想您不吃豆浆的原因。  
您认为以下陈述有多重要？  
“我不认为它是一种零食”

- 极其重要
  - 非常重要
  - 一般重要
  - 有点重要
  - 完全不重要
- 

**Q1190.**

试回想您不吃豆浆的原因。  
您认为以下陈述有多重要？  
“我不喜欢它”

- 极其重要
  - 非常重要
  - 一般重要
  - 有点重要
  - 完全不重要
- 

**Q1191.**

试回想您不吃豆浆的原因。  
您认为以下陈述有多重要？  
“我不经常吃它”

- 极其重要



- 非常重要
  - 一般重要
  - 有点重要
  - 完全不重要
- 

**Q1192.**

试回想您不吃豆浆的原因。  
您认为以下陈述有多重要？  
“它的分量大小不合适”

- 极其重要
  - 非常重要
  - 一般重要
  - 有点重要
  - 完全不重要
- 

**Q1193.**

试回想您不吃豆浆的原因。  
您认为以下陈述有多重要？  
“它不足以填饱肚子”

- 极其重要
  - 非常重要
  - 一般重要
  - 有点重要
  - 完全不重要
- 

**Q1194.**

试回想您不吃豆浆的原因。  
您认为以下陈述有多重要？  
“它不健康”

- 极其重要
  - 非常重要
  - 一般重要
  - 有点重要
  - 完全不重要
- 

**Q1195.**

试回想您不吃豆浆的原因。  
您认为以下陈述有多重要？  
“它不方便”

- 极其重要
  - 非常重要
  - 一般重要
  - 有点重要
  - 完全不重要
- 

**Q1196.**

试回想您不吃豆浆的原因。  
您认为以下陈述有多重要？  
“我不想纵容自己”

- 极其重要
  - 非常重要
  - 一般重要
  - 有点重要
  - 完全不重要
- 

**Q1197.**

试回想您不吃豆浆的原因。  
您认为以下陈述有多重要？  
“它不适用于特定场合”

- 极其重要
  - 非常重要
  - 一般重要
  - 有点重要
  - 完全不重要
- 

**Q1198.**

试回想您不吃豆浆的原因。

您认为以下陈述有多重要？

“有其他人有的时候我不吃它”

- 极其重要
  - 非常重要
  - 一般重要
  - 有点重要
  - 完全不重要
- 

**Q1199.**

试回想您不吃豆浆的原因。

您认为以下陈述有多重要？

“价格太高”

- 极其重要
  - 非常重要
  - 一般重要
  - 有点重要
  - 完全不重要
- 

**Q1200.**

试回想您不吃豆浆的原因。

您认为以下陈述有多重要？

“我不喜欢它看起来的样子“

- 极其重要
  - 非常重要
  - 一般重要
  - 有点重要
  - 完全不重要
- 

### Q1201.

试回想您不吃豆浆的原因。  
您认为以下陈述有多重要？

“它卡路里太高“

- 极其重要
  - 非常重要
  - 一般重要
  - 有点重要
  - 完全不重要
- 

### Q1202.

试回想您不吃豆浆的原因。  
您认为以下陈述有多重要？

“我不应该吃它（例如出于文化、宗教习俗）“

- 极其重要
  - 非常重要
  - 一般重要
  - 有点重要
  - 完全不重要
- 

### Q1203.

试回想您不吃豆浆的原因。

您认为以下陈述有多重要？

“吃它显得我很土”

- 极其重要
  - 非常重要
  - 一般重要
  - 有点重要
  - 完全不重要
- 

**Q1204.**

试回想您不吃豆浆的原因。

您认为以下陈述有多重要？

“它不是我在那个时刻想吃的东西”

- 极其重要
  - 非常重要
  - 一般重要
  - 有点重要
  - 完全不重要
- 

**Q1205.**

试回想您不吃豆浆的原因。

您认为以下陈述有多重要？

“我最近刚吃过， 我不想太经常吃同样的东西 ”

- 极其重要
  - 非常重要
  - 一般重要
  - 有点重要
  - 完全不重要
- 

**Q1206.**

试回想您不吃豆浆的原因。

您认为以下陈述有多重要？

“我绝不选它。我喜欢每天吃一样的食物”

- 极其重要
  - 非常重要
  - 一般重要
  - 有点重要
  - 完全不重要
- 

#### Q1207.

试回想您不吃豆浆的原因。

您认为以下陈述有多重要？

“这个食物让我感到伤心、孤单或沮丧”

- 极其重要
  - 非常重要
  - 一般重要
  - 有点重要
  - 完全不重要
- 

#### Q1208.

试回想您不吃豆浆的原因。

您认为以下陈述有多重要？

“它不是有机的”

- 极其重要
- 非常重要
- 一般重要
- 有点重要
- 完全不重要

---

## Reasons for Fruit Choices(Full RATA)

---

Q1209.

您吃香蕉吗？

- 是的，我吃
  - 不是，我不吃
- 

Q1210.

试回想您吃香蕉的原因。

您认为以下陈述有多重要？

”...因为我习惯吃它“

- 极其重要
  - 非常重要
  - 一般重要
  - 有点重要
  - 完全不重要
- 

Q1211.

试回想您吃香蕉的原因。

您认为以下陈述有多重要？

”...因为它很健康“

- 极其重要
  - 非常重要
  - 一般重要
  - 有点重要
  - 完全不重要
- 

Q1212.

试回想您吃香蕉的原因。  
您认为以下陈述有多重要？  
"...因为它准备起来很快"

- 极其重要
  - 非常重要
  - 一般重要
  - 有点重要
  - 完全不重要
- 

### Q1213.

试回想您吃香蕉的原因。  
您认为以下陈述有多重要？  
"...因为它的味道很好"

- 极其重要
  - 非常重要
  - 一般重要
  - 有点重要
  - 完全不重要
- 

### Q1214.

试回想您吃香蕉的原因。  
您认为以下陈述有多重要？  
"...为了纵容自己"

- 极其重要
  - 非常重要
  - 一般重要
  - 有点重要
  - 完全不重要
-



**Q1215.**

试回想您吃香蕉的原因。

您认为以下陈述有多重要？

“...因为它是天然的（例如没有经过基因改造）”

- 极其重要
  - 非常重要
  - 一般重要
  - 有点重要
  - 完全不重要
- 

**Q1216.**

试回想您吃香蕉的原因。

您认为以下陈述有多重要？

“...因为我不想再花更多的钱”

- 极其重要
  - 非常重要
  - 一般重要
  - 有点重要
  - 完全不重要
- 

**Q1217.**

试回想您吃香蕉的原因。

您认为以下陈述有多重要？

“...因为它的卡路里很低”

- 极其重要
- 非常重要
- 一般重要
- 有点重要

完全不重要

---

**Q1218.**

试回想您吃香蕉的原因。  
您认为以下陈述有多重要？

”...因为我很沮丧“

- 极其重要
  - 非常重要
  - 一般重要
  - 有点重要
  - 完全不重要
- 

**Q1219.**

试回想您吃香蕉的原因。  
您认为以下陈述有多重要？

”...因为它让我在别人面前看起来很好“

- 极其重要
  - 非常重要
  - 一般重要
  - 有点重要
  - 完全不重要
- 

**Q1220.**

试回想您吃香蕉的原因。  
您认为以下陈述有多重要？

”...因为不吃它会不礼貌“

- 极其重要
- 非常重要

- 一般重要
  - 有点重要
  - 完全不重要
- 

**Q1221.**

试回想您吃香蕉的原因。

您认为以下陈述有多重要？

“...因为它的呈现方式很有吸引力（例如包装）”

- 极其重要
  - 非常重要
  - 一般重要
  - 有点重要
  - 完全不重要
- 

**Q1222.**

试回想您吃香蕉的原因。

您认为以下陈述有多重要？

“...这样我就可以和其他人共度时光”

- 极其重要
  - 非常重要
  - 一般重要
  - 有点重要
  - 完全不重要
- 

**Q1223.**

试回想您吃香蕉的原因。

您认为以下陈述有多重要？

“...因为它是有机”

- 极其重要
  - 非常重要
  - 一般重要
  - 有点重要
  - 完全不重要
- 

**Q1224.**

试回想您吃香蕉的原因。  
您认为以下陈述有多重要？

“...因为我从小吃到大”

- 极其重要
  - 非常重要
  - 一般重要
  - 有点重要
  - 完全不重要
- 

**Q1225.**

试回想您吃香蕉的原因。  
您认为以下陈述有多重要？

“...因为吃它让我很享受”

- 极其重要
  - 非常重要
  - 一般重要
  - 有点重要
  - 完全不重要
- 

**Q1226.**

试回想您吃香蕉的原因。

您认为以下陈述有多重要？

"...因为我饿了"

- 极其重要
  - 非常重要
  - 一般重要
  - 有点重要
  - 完全不重要
- 

**Q1227.**

试回想您吃香蕉的原因。

您认为以下陈述有多重要？

"...因为我经常吃它"

- 极其重要
  - 非常重要
  - 一般重要
  - 有点重要
  - 完全不重要
- 

**Q1228.**

试回想您吃香蕉的原因。

您认为以下陈述有多重要？

"...因为我对它有食欲"

- 极其重要
  - 非常重要
  - 一般重要
  - 有点重要
  - 完全不重要
-

**Q1229.**

试回想您吃香蕉的原因。  
您认为以下陈述有多重要？

"...因为它很容易准备"

- 极其重要
  - 非常重要
  - 一般重要
  - 有点重要
  - 完全不重要
- 

**Q1230.**

试回想您吃香蕉的原因。  
您认为以下陈述有多重要？

"...因为我很伤心"

- 极其重要
  - 非常重要
  - 一般重要
  - 有点重要
  - 完全不重要
- 

**Q1231.**

试回想您吃香蕉的原因。  
您认为以下陈述有多重要？

"...因为脂肪含量低"

- 极其重要
- 非常重要
- 一般重要
- 有点重要

完全不重要

---

### Q1232.

试回想您吃香蕉的原因。  
您认为以下陈述有多重要？

"...因为我从广告或在电视上看过它"

- 极其重要
  - 非常重要
  - 一般重要
  - 有点重要
  - 完全不重要
- 

### Q1233.

试回想您吃香蕉的原因。  
您认为以下陈述有多重要？

"...因为它使社交聚会更加舒适"

- 极其重要
  - 非常重要
  - 一般重要
  - 有点重要
  - 完全不重要
- 

### Q1234.

试回想您吃香蕉的原因。  
您认为以下陈述有多重要？

"...因为我应该吃它"

- 极其重要
- 非常重要

- 一般重要
  - 有点重要
  - 完全不重要
- 

**Q1235.**

试回想您吃香蕉的原因。  
您认为以下陈述有多重要？

"...因为其他人喜欢它"

- 极其重要
  - 非常重要
  - 一般重要
  - 有点重要
  - 完全不重要
- 

**Q1236.**

试回想您吃香蕉的原因。  
您认为以下陈述有多重要？

"...因为我感到孤独"

- 极其重要
  - 非常重要
  - 一般重要
  - 有点重要
  - 完全不重要
- 

**Q1237.**

试回想您吃香蕉的原因。  
您认为以下陈述有多重要？

"...因为我关注我的体重"



- 极其重要
  - 非常重要
  - 一般重要
  - 有点重要
  - 完全不重要
- 

**Q1238.**

试回想您吃香蕉的原因。

您认为以下陈述有多重要？

"...因为它不含有害物质（例如杀虫剂，污染物，抗生素）"

- 极其重要
  - 非常重要
  - 一般重要
  - 有点重要
  - 完全不重要
- 

**Q1239.**

试回想您吃香蕉的原因。

您认为以下陈述有多重要？

"...因为它最方便"

- 极其重要
  - 非常重要
  - 一般重要
  - 有点重要
  - 完全不重要
- 

**Q1240.**

试回想您吃香蕉的原因。

您认为以下陈述有多重要？

"...因为我需要能量"

- 极其重要
  - 非常重要
  - 一般重要
  - 有点重要
  - 完全不重要
- 

**Q1241.**

试回想您吃香蕉的原因。

您认为以下陈述有多重要？

"...因为我熟悉它"

- 极其重要
  - 非常重要
  - 一般重要
  - 有点重要
  - 完全不重要
- 

**Q1242.**

试回想您吃香蕉的原因。

您认为以下陈述有多重要？

"...因为我喜欢它"

- 极其重要
  - 非常重要
  - 一般重要
  - 有点重要
  - 完全不重要
-

**Q1243.**

试回想您吃香蕉的原因。  
您认为以下陈述有多重要？

"...因为它能令我感到愉悦的饱腹感"

- 极其重要
  - 非常重要
  - 一般重要
  - 有点重要
  - 完全不重要
- 

**Q1244.**

试回想您吃香蕉的原因。  
您认为以下陈述有多重要？

"...为了奖励自己"

- 极其重要
  - 非常重要
  - 一般重要
  - 有点重要
  - 完全不重要
- 

**Q1245.**

试回想您吃香蕉的原因。  
您认为以下陈述有多重要？

"...出于传统（例如家庭传统，特殊场合）"

- 极其重要
- 非常重要
- 一般重要
- 有点重要

完全不重要

---

**Q1246.**

试回想您吃香蕉的原因。  
您认为以下陈述有多重要？

"...因为它适用于特定场合"

- 极其重要
  - 非常重要
  - 一般重要
  - 有点重要
  - 完全不重要
- 

**Q1247.**

试回想您吃香蕉的原因。  
您认为以下陈述有多重要？

"...保持均衡饮食"

- 极其重要
  - 非常重要
  - 一般重要
  - 有点重要
  - 完全不重要
- 

**Q1248.**

试回想您吃香蕉的原因。  
您认为以下陈述有多重要？

"...因为它的社交性"

- 极其重要
- 非常重要

- 一般重要
  - 有点重要
  - 完全不重要
- 

**Q1249.**

试回想您吃香蕉的原因。  
您认为以下陈述有多重要？

"...因为它的价格不贵"

- 极其重要
  - 非常重要
  - 一般重要
  - 有点重要
  - 完全不重要
- 

**Q1250.**

试回想您吃香蕉的原因。  
您认为以下陈述有多重要？

"...因为它自然而然地吸引了我（吸引人的颜色）"

- 极其重要
  - 非常重要
  - 一般重要
  - 有点重要
  - 完全不重要
- 

**Q1251.**

试回想您吃香蕉的原因。  
您认为以下陈述有多重要？

"...避免让那些试图让我开心的人失望"

- 极其重要
  - 非常重要
  - 一般重要
  - 有点重要
  - 完全不重要
- 

**Q1252.**

试回想您吃香蕉的原因。  
您认为以下陈述有多重要？

"...因为它很新潮"

- 极其重要
  - 非常重要
  - 一般重要
  - 有点重要
  - 完全不重要
- 

**Q1253.**

试回想您吃香蕉的原因。  
您认为以下陈述有多重要？

"...因为它打折"

- 极其重要
  - 非常重要
  - 一般重要
  - 有点重要
  - 完全不重要
- 

**Q1254.**

试回想您吃香蕉的原因。

您认为以下陈述有多重要？

"...因为它让我保持身材"

- 极其重要
  - 非常重要
  - 一般重要
  - 有点重要
  - 完全不重要
- 

**Q1255.**

试回想您吃香蕉的原因。

您认为以下陈述有多重要？

"...因为这是唯一的选择"

- 极其重要
  - 非常重要
  - 一般重要
  - 有点重要
  - 完全不重要
- 

**Q1256.**

试回想您吃香蕉的原因。

您认为以下陈述有多重要？

"...因为我想每天都吃它"

- 极其重要
  - 非常重要
  - 一般重要
  - 有点重要
  - 完全不重要
-

**Q1257.**

试回想您不吃香蕉的原因。  
您认为以下陈述有多重要？  
“我不认为它是一种零食”

- 极其重要
  - 非常重要
  - 一般重要
  - 有点重要
  - 完全不重要
- 

**Q1258.**

试回想您不吃香蕉的原因。  
您认为以下陈述有多重要？  
“我不喜欢它”

- 极其重要
  - 非常重要
  - 一般重要
  - 有点重要
  - 完全不重要
- 

**Q1259.**

试回想您不吃香蕉的原因。  
您认为以下陈述有多重要？  
“我不经常吃它”

- 极其重要
- 非常重要
- 一般重要
- 有点重要
- 完全不重要



**Q1260.**

试回想您不吃香蕉的原因。

您认为以下陈述有多重要？

“它的分量大小不合适”

- 极其重要
  - 非常重要
  - 一般重要
  - 有点重要
  - 完全不重要
- 

**Q1261.**

试回想您不吃香蕉的原因。

您认为以下陈述有多重要？

“它不足以填饱肚子”

- 极其重要
  - 非常重要
  - 一般重要
  - 有点重要
  - 完全不重要
- 

**Q1262.**

试回想您不吃香蕉的原因。

您认为以下陈述有多重要？

“它不健康”

- 极其重要
- 非常重要
- 一般重要
- 有点重要
- 完全不重要

---

**Q1263.**

试回想您不吃香蕉的原因。  
您认为以下陈述有多重要？  
“它不方便”

- 极其重要
  - 非常重要
  - 一般重要
  - 有点重要
  - 完全不重要
- 

**Q1264.**

试回想您不吃香蕉的原因。  
您认为以下陈述有多重要？  
“我不想纵容自己”

- 极其重要
  - 非常重要
  - 一般重要
  - 有点重要
  - 完全不重要
- 

**Q1265.**

试回想您不吃香蕉的原因。  
您认为以下陈述有多重要？  
“它不适用于特定场合”

- 极其重要
- 非常重要
- 一般重要
- 有点重要
- 完全不重要

---

**Q1266.**

试回想您不吃香蕉的原因。  
您认为以下陈述有多重要？  
“有其他人在的时候我不吃它”

- 极其重要
  - 非常重要
  - 一般重要
  - 有点重要
  - 完全不重要
- 

**Q1267.**

试回想您不吃香蕉的原因。  
您认为以下陈述有多重要？  
“价格太高”

- 极其重要
  - 非常重要
  - 一般重要
  - 有点重要
  - 完全不重要
- 

**Q1268.**

试回想您不吃香蕉的原因。  
您认为以下陈述有多重要？  
“我不喜欢它看起来的样子”

- 极其重要
- 非常重要
- 一般重要
- 有点重要

完全不重要

---

**Q1269.**

试回想您不吃香蕉的原因。

您认为以下陈述有多重要？

“它卡路里太高“

- 极其重要
  - 非常重要
  - 一般重要
  - 有点重要
  - 完全不重要
- 

**Q1270.**

试回想您不吃香蕉的原因。

您认为以下陈述有多重要？

“我不应该吃它（例如出于文化、宗教习俗）“

- 极其重要
  - 非常重要
  - 一般重要
  - 有点重要
  - 完全不重要
- 

**Q1271.**

试回想您不吃香蕉的原因。

您认为以下陈述有多重要？

“吃它显得我很土“

- 极其重要
- 非常重要
- 一般重要

- 有点重要
  - 完全不重要
- 

**Q1272.**

试回想您不吃香蕉的原因。  
您认为以下陈述有多重要？  
“它不是我在那个时刻想吃的东西”

- 极其重要
  - 非常重要
  - 一般重要
  - 有点重要
  - 完全不重要
- 

**Q1273.**

试回想您不吃香蕉的原因。  
您认为以下陈述有多重要？  
“我最近刚吃过， 我不想太经常吃同样的东西 ”

- 极其重要
  - 非常重要
  - 一般重要
  - 有点重要
  - 完全不重要
- 

**Q1274.**

试回想您不吃香蕉的原因。  
您认为以下陈述有多重要？  
“我绝不选它。 我喜欢每天吃一样的食物 ”

- 极其重要

- 非常重要
  - 一般重要
  - 有点重要
  - 完全不重要
- 

**Q1275.**

试回想您不吃香蕉的原因。  
您认为以下陈述有多重要？

“这个食物让我感到伤心、孤单或沮丧”

- 极其重要
  - 非常重要
  - 一般重要
  - 有点重要
  - 完全不重要
- 

**Q1276.**

试回想您不吃红烧肉的原因。  
您认为以下陈述有多重要？

“它不是有机的”

- 极其重要
  - 非常重要
  - 一般重要
  - 有点重要
  - 完全不重要
- 

**Reasons for Sweet food Choices(Full RATA)**

---

**Q1277.**

您吃麻球吗？

- 是的，我吃
  - 不是，我不吃
- 

**Q1278.**

试回想您吃麻球的原因。

您认为以下陈述有多重要？

“...因为我习惯吃它”

- 极其重要
  - 非常重要
  - 一般重要
  - 有点重要
  - 完全不重要
- 

**Q1279.**

试回想您吃麻球的原因。

您认为以下陈述有多重要？

“...因为它很健康”

- 极其重要
  - 非常重要
  - 一般重要
  - 有点重要
  - 完全不重要
- 

**Q1280.**

试回想您吃麻球的原因。

您认为以下陈述有多重要？

“...因为它准备起来很快”

- 极其重要

- 非常重要
  - 一般重要
  - 有点重要
  - 完全不重要
- 

**Q1281.**

试回想您吃麻球的原因。

您认为以下陈述有多重要？

"...因为它的味道很好"

- 极其重要
  - 非常重要
  - 一般重要
  - 有点重要
  - 完全不重要
- 

**Q1282.**

试回想您吃麻球的原因。

您认为以下陈述有多重要？

"...为了纵容自己"

- 极其重要
  - 非常重要
  - 一般重要
  - 有点重要
  - 完全不重要
- 

**Q1283.**

试回想您吃麻球的原因。

您认为以下陈述有多重要？

"...因为它是天然的（例如没有经过基因改造）"



- 极其重要
  - 非常重要
  - 一般重要
  - 有点重要
  - 完全不重要
- 

**Q1284.**

试回想您吃麻球的原因。  
您认为以下陈述有多重要？

“...因为我不想再花更多的钱”

- 极其重要
  - 非常重要
  - 一般重要
  - 有点重要
  - 完全不重要
- 

**Q1285.**

试回想您吃麻球的原因。  
您认为以下陈述有多重要？

“...因为它的卡路里很低”

- 极其重要
  - 非常重要
  - 一般重要
  - 有点重要
  - 完全不重要
- 

**Q1286.**

试回想您吃麻球的原因。

您认为以下陈述有多重要？

”...因为我很沮丧“

- 极其重要
  - 非常重要
  - 一般重要
  - 有点重要
  - 完全不重要
- 

**Q1287.**

试回想您吃麻球的原因。

您认为以下陈述有多重要？

”...因为它让我在别人面前看起来很好“

- 极其重要
  - 非常重要
  - 一般重要
  - 有点重要
  - 完全不重要
- 

**Q1288.**

试回想您吃麻球的原因。

您认为以下陈述有多重要？

”...因为不吃它会不礼貌“

- 极其重要
  - 非常重要
  - 一般重要
  - 有点重要
  - 完全不重要
-

**Q1289.**

试回想您吃麻球的原因。

您认为以下陈述有多重要？

”...因为它的呈现方式很有吸引力（例如包装）“

- 极其重要
  - 非常重要
  - 一般重要
  - 有点重要
  - 完全不重要
- 

**Q1290.**

试回想您吃麻球的原因。

您认为以下陈述有多重要？

”...这样我就可以和其他人共度时光“

- 极其重要
  - 非常重要
  - 一般重要
  - 有点重要
  - 完全不重要
- 

**Q1291.**

试回想您吃麻球的原因。

您认为以下陈述有多重要？

”...因为它是机器的“

- 极其重要
- 非常重要
- 一般重要
- 有点重要

完全不重要

---

**Q1292.**

试回想您吃麻球的原因。  
您认为以下陈述有多重要？

"...因为我从小吃到大"

- 极其重要
  - 非常重要
  - 一般重要
  - 有点重要
  - 完全不重要
- 

**Q1293.**

试回想您吃麻球的原因。  
您认为以下陈述有多重要？

"...因为吃它让我很享受"

- 极其重要
  - 非常重要
  - 一般重要
  - 有点重要
  - 完全不重要
- 

**Q1294.**

试回想您吃麻球的原因。  
您认为以下陈述有多重要？

"...因为我饿了"

- 极其重要
- 非常重要

- 一般重要
  - 有点重要
  - 完全不重要
- 

**Q1295.**

试回想您吃麻球的原因。  
您认为以下陈述有多重要？

"...因为我经常吃它"

- 极其重要
  - 非常重要
  - 一般重要
  - 有点重要
  - 完全不重要
- 

**Q1296.**

试回想您吃麻球的原因。  
您认为以下陈述有多重要？

"...因为我对它有食欲"

- 极其重要
  - 非常重要
  - 一般重要
  - 有点重要
  - 完全不重要
- 

**Q1297.**

试回想您吃麻球的原因。  
您认为以下陈述有多重要？

"...因为它很容易准备"

- 极其重要
  - 非常重要
  - 一般重要
  - 有点重要
  - 完全不重要
- 

**Q1298.**

试回想您吃麻球的原因。  
您认为以下陈述有多重要？

"...因为我很伤心"

- 极其重要
  - 非常重要
  - 一般重要
  - 有点重要
  - 完全不重要
- 

**Q1299.**

试回想您吃麻球的原因。  
您认为以下陈述有多重要？

"...因为脂肪含量低"

- 极其重要
  - 非常重要
  - 一般重要
  - 有点重要
  - 完全不重要
- 

**Q1300.**

试回想您吃麻球的原因。

您认为以下陈述有多重要？

"...因为我从广告或在电视上看过它"

- 极其重要
  - 非常重要
  - 一般重要
  - 有点重要
  - 完全不重要
- 

**Q1301.**

试回想您吃麻球的原因。

您认为以下陈述有多重要？

"...因为它使社交聚会更加舒适"

- 极其重要
  - 非常重要
  - 一般重要
  - 有点重要
  - 完全不重要
- 

**Q1302.**

试回想您吃麻球的原因。

您认为以下陈述有多重要？

"...因为我应该吃它"

- 极其重要
  - 非常重要
  - 一般重要
  - 有点重要
  - 完全不重要
-

**Q1303.**

试回想您吃麻球的原因。  
您认为以下陈述有多重要？

"...因为其他人喜欢它"

- 极其重要
  - 非常重要
  - 一般重要
  - 有点重要
  - 完全不重要
- 

**Q1304.**

试回想您吃麻球的原因。  
您认为以下陈述有多重要？

"...因为我感到孤独"

- 极其重要
  - 非常重要
  - 一般重要
  - 有点重要
  - 完全不重要
- 

**Q1305.**

试回想您吃麻球的原因。  
您认为以下陈述有多重要？

"...因为我关注我的体重"

- 极其重要
- 非常重要
- 一般重要
- 有点重要



完全不重要

---

### Q1306.

试回想您吃麻球的原因。

您认为以下陈述有多重要？

"...因为它不含有害物质（例如杀虫剂，污染物，抗生素）"

- 极其重要
  - 非常重要
  - 一般重要
  - 有点重要
  - 完全不重要
- 

### Q1307.

试回想您吃麻球的原因。

您认为以下陈述有多重要？

"...因为它最方便"

- 极其重要
  - 非常重要
  - 一般重要
  - 有点重要
  - 完全不重要
- 

### Q1308.

试回想您吃麻球的原因。

您认为以下陈述有多重要？

"...因为我需要能量"

- 极其重要
- 非常重要

- 一般重要
  - 有点重要
  - 完全不重要
- 

**Q1309.**

试回想您吃麻球的原因。  
您认为以下陈述有多重要？

"...因为我熟悉它"

- 极其重要
  - 非常重要
  - 一般重要
  - 有点重要
  - 完全不重要
- 

**Q1310.**

试回想您吃麻球的原因。  
您认为以下陈述有多重要？

"...因为我喜欢它"

- 极其重要
  - 非常重要
  - 一般重要
  - 有点重要
  - 完全不重要
- 

**Q1311.**

试回想您吃麻球的原因。  
您认为以下陈述有多重要？

"...因为它能令我感到愉悦的饱腹感"

- 极其重要
  - 非常重要
  - 一般重要
  - 有点重要
  - 完全不重要
- 

**Q1312.**

试回想您吃麻球的原因。  
您认为以下陈述有多重要？

"...为了奖励自己"

- 极其重要
  - 非常重要
  - 一般重要
  - 有点重要
  - 完全不重要
- 

**Q1313.**

试回想您吃麻球的原因。  
您认为以下陈述有多重要？

"...出于传统（例如家庭传统，特殊场合）"

- 极其重要
  - 非常重要
  - 一般重要
  - 有点重要
  - 完全不重要
- 

**Q1314.**

试回想您吃麻球的原因。

您认为以下陈述有多重要？

"...因为它适用于特定场合"

- 极其重要
  - 非常重要
  - 一般重要
  - 有点重要
  - 完全不重要
- 

**Q1315.**

试回想您吃麻球的原因。

您认为以下陈述有多重要？

"...保持均衡饮食"

- 极其重要
  - 非常重要
  - 一般重要
  - 有点重要
  - 完全不重要
- 

**Q1316.**

试回想您吃麻球的原因。

您认为以下陈述有多重要？

"...因为它的社交性"

- 极其重要
  - 非常重要
  - 一般重要
  - 有点重要
  - 完全不重要
-

**Q1317.**

试回想您吃麻球的原因。  
您认为以下陈述有多重要？

"...因为它的价格不贵"

- 极其重要
  - 非常重要
  - 一般重要
  - 有点重要
  - 完全不重要
- 

**Q1318.**

试回想您吃麻球的原因。  
您认为以下陈述有多重要？

"...因为它自然而然地吸引了我（吸引人的颜色）"

- 极其重要
  - 非常重要
  - 一般重要
  - 有点重要
  - 完全不重要
- 

**Q1319.**

试回想您吃麻球的原因。  
您认为以下陈述有多重要？

"...避免让那些试图让我开心的人失望"

- 极其重要
- 非常重要
- 一般重要
- 有点重要

完全不重要

---

**Q1320.**

试回想您吃麻球的原因。  
您认为以下陈述有多重要？

"...因为它很新潮"

- 极其重要
  - 非常重要
  - 一般重要
  - 有点重要
  - 完全不重要
- 

**Q1321.**

试回想您吃麻球的原因。  
您认为以下陈述有多重要？

"...因为它打折"

- 极其重要
  - 非常重要
  - 一般重要
  - 有点重要
  - 完全不重要
- 

**Q1322.**

试回想您吃麻球的原因。  
您认为以下陈述有多重要？

"...因为它让我保持身材"

- 极其重要
- 非常重要

- 一般重要
  - 有点重要
  - 完全不重要
- 

**Q1323.**

试回想您吃麻球的原因。  
您认为以下陈述有多重要？

"...因为这是唯一的选择"

- 极其重要
  - 非常重要
  - 一般重要
  - 有点重要
  - 完全不重要
- 

**Q1324.**

试回想您吃麻球的原因。  
您认为以下陈述有多重要？

"...因为我想每天都吃它"

- 极其重要
  - 非常重要
  - 一般重要
  - 有点重要
  - 完全不重要
- 

**Q1325.**

试回想您不吃麻球的原因。  
您认为以下陈述有多重要？

"我不认为它是一种零食"

- 极其重要
  - 非常重要
  - 一般重要
  - 有点重要
  - 完全不重要
- 

**Q1326.**

试回想您不吃麻球的原因。  
您认为以下陈述有多重要？  
“我不喜欢它”

- 极其重要
  - 非常重要
  - 一般重要
  - 有点重要
  - 完全不重要
- 

**Q1327.**

试回想您不吃麻球的原因。  
您认为以下陈述有多重要？  
“我不经常吃它”

- 极其重要
  - 非常重要
  - 一般重要
  - 有点重要
  - 完全不重要
- 

**Q1328.**

试回想您不吃麻球的原因。  
您认为以下陈述有多重要？  
“它的分量大小不合适”



- 极其重要
  - 非常重要
  - 一般重要
  - 有点重要
  - 完全不重要
- 

**Q1329.**

试回想您不吃麻球的原因。  
您认为以下陈述有多重要？  
“它不足以填饱肚子”

- 极其重要
  - 非常重要
  - 一般重要
  - 有点重要
  - 完全不重要
- 

**Q1330.**

试回想您不吃麻球的原因。  
您认为以下陈述有多重要？  
“它不健康”

- 极其重要
  - 非常重要
  - 一般重要
  - 有点重要
  - 完全不重要
- 

**Q1331.**

试回想您不吃麻球的原因。  
您认为以下陈述有多重要？

”它不方便“

- 极其重要
  - 非常重要
  - 一般重要
  - 有点重要
  - 完全不重要
- 

### Q1332.

试回想您不吃麻球的原因。  
您认为以下陈述有多重要？

”我不想纵容自己“

- 极其重要
  - 非常重要
  - 一般重要
  - 有点重要
  - 完全不重要
- 

### Q1333.

试回想您不吃麻球的原因。  
您认为以下陈述有多重要？

”它不适用于特定场合“

- 极其重要
  - 非常重要
  - 一般重要
  - 有点重要
  - 完全不重要
- 

### Q1334.

试回想您不吃麻球的原因。

您认为以下陈述有多重要？

“有其他人存在的时候我不吃它”

- 极其重要
  - 非常重要
  - 一般重要
  - 有点重要
  - 完全不重要
- 

**Q1335.**

试回想您不吃麻球的原因。

您认为以下陈述有多重要？

“价格太高”

- 极其重要
  - 非常重要
  - 一般重要
  - 有点重要
  - 完全不重要
- 

**Q1336.**

试回想您不吃麻球的原因。

您认为以下陈述有多重要？

“我不喜欢它看起来的样子”

- 极其重要
  - 非常重要
  - 一般重要
  - 有点重要
  - 完全不重要
- 

**Q1337.**

试回想您不吃麻球的原因。  
您认为以下陈述有多重要？

“它卡路里太高”

- 极其重要
  - 非常重要
  - 一般重要
  - 有点重要
  - 完全不重要
- 

### Q1338.

试回想您不吃麻球的原因。  
您认为以下陈述有多重要？

“我不应该吃它（例如出于文化、宗教习俗）”

- 极其重要
  - 非常重要
  - 一般重要
  - 有点重要
  - 完全不重要
- 

### Q1339.

试回想您不吃麻球的原因。  
您认为以下陈述有多重要？

“吃它显得我很土”

- 极其重要
  - 非常重要
  - 一般重要
  - 有点重要
  - 完全不重要
-

**Q1340.**

试回想您不吃麻球的原因。

您认为以下陈述有多重要？

“它不是我在那个时刻想吃的东西”

- 极其重要
  - 非常重要
  - 一般重要
  - 有点重要
  - 完全不重要
- 

**Q1341.**

试回想您不吃麻球的原因。

您认为以下陈述有多重要？

“我最近刚吃过， 我不想太经常吃同样的东西 ”

- 极其重要
  - 非常重要
  - 一般重要
  - 有点重要
  - 完全不重要
- 

**Q1342.**

试回想您不吃麻球的原因。

您认为以下陈述有多重要？

“我绝不选它。 我喜欢每天吃一样的食物 ”

- 极其重要
- 非常重要
- 一般重要
- 有点重要
- 完全不重要

---

**Q1343.**

试回想您不吃豆浆的原因。

您认为以下陈述有多重要？

“这个食物让我感到伤心、孤单或沮丧”

- 极其重要
- 非常重要
- 一般重要
- 有点重要
- 完全不重要

---

**Q1344.**

试回想您不吃红烧肉的原因。

您认为以下陈述有多重要？

“它不是有机的”

- 极其重要
- 非常重要
- 一般重要
- 有点重要
- 完全不重要

Powered by Qualtrics
