# Supplementary material for: Comparing Four Question Formats in Five Languages for On-Line Consumer Surveys
Source: MDPI journal article supplement (doi:10.3390/mps3030049), 2020-07-14
Supplement: s1 [file s1]

## Demographics

---

Qual seu gênero?

- Masculino
  - Feminino
- 

Que ano você nasceu?

- 1943 ou antes
  - 1944 - 1964
  - 1965 - 1979
  - 1980 - 1994
  - 1995 -2001
  - 2002 ou depois
- 

Nível acadêmico completo

- Escola primária ou inferior
  - Ensino Medio
  - Ensino Superior
- 

Quantos adultos vivem em sua casa incluindo você?

- 1
- 2

- 3
  - 4
  - 5 +
- 

Quantos menores de 18 anos vivem em sua casa?

- 0
  - 1
  - 2
  - 3
  - 4 +
- 

Nós nos importamos com a qualidade dos dados da nossa pesquisa e esperamos receber suas opiniões da maneira mais acurada, portanto, é importante para nós que você responda a cada questão dessa pesquisa cuidadosamente.

Você se compromete em fornecer as respostas de maneira cuidadosa e honesta, nessa pesquisa?

- Eu irei fornecer as minhas melhores respostas
  - Eu não irei fornecer as minhas melhores respostas
  - Eu não posso prometer qualquer uma das duas formas
- 

## Food Involvement

---

***A pesquisa que você realizará é sobre comida.***

Por favor, indique o quanto você concorda/discorda com as afirmações abaixo:

---

Eu não fico pensando em comida todos os dias

- Discorda plenamente
  - Discorda
  - Discorda parcialmente
  - Nem concorda ou discorda
  - Concorda parcialmente
  - Concorda
  - Concorda plenamente
- 

Cozinhar não é muito agradável

- Discorda plenamente
  - Discorda
  - Discorda parcialmente
  - Nem concorda ou discorda
  - Concorda parcialmente
  - Concorda
  - Concorda plenamente
- 

Eu gosto de falar sobre o que comi e o que comerei

- Discorda plenamente
  - Discorda
  - Discorda parcialmente
  - Nem concorda ou discorda
  - Concorda parcialmente
  - Concorda
  - Concorda plenamente
- 

Comparando-se com outras decisões diárias, minhas escolhas por determinados alimentos, não são tão importantes

- Discorda plenamente

- Discorda
  - Discorda parcialmente
  - Nem concorda ou discorda
  - Concorda parcialmente
  - Concorda
  - Concorda plenamente
- 

Quando viajo, uma das coisas que me deixa muito ansioso(a), é o que comerei no local

- Discorda plenamente
  - Discorda
  - Discorda parcialmente
  - Nem concorda ou discorda
  - Concorda parcialmente
  - Concorda
  - Concorda plenamente
- 

Sempre, ou na maioria das vezes, eu limpo o prato e a mesa, após as refeições

- Discorda plenamente
  - Discorda
  - Discorda parcialmente
  - Nem concorda ou discorda
  - Concorda parcialmente
  - Concorda
  - Concorda plenamente
- 

Eu gosto de cozinhar para os outros e para mim também

- Discorda plenamente
- Discorda
- Discorda parcialmente

- Nem concorda ou discorda
  - Concorda parcialmente
  - Concorda
  - Concorda plenamente
- 

Quando saio para comer, não fico pensando ou falando muito sobre o gosto da comida

- Discorda plenamente
  - Discorda
  - Discorda parcialmente
  - Nem concorda ou discorda
  - Concorda parcialmente
  - Concorda
  - Concorda plenamente
- 

Eu não gosto de misturar ou picar alimentos

- Discorda plenamente
  - Discorda
  - Discorda parcialmente
  - Nem concorda ou discorda
  - Concorda parcialmente
  - Concorda
  - Concorda plenamente
- 

Sou eu quem compro a maior parte dos meus alimentos

- Discorda plenamente
- Discorda
- Discorda parcialmente
- Nem concorda ou discorda
- Concorda parcialmente

- Concorda
  - Concorda plenamente
- 

Eu não lavo os talheres ou tiro a mesa

- Discorda plenamente
  - Discorda
  - Discorda parcialmente
  - Nem concorda ou discorda
  - Concorda parcialmente
  - Concorda
  - Concorda plenamente
- 

Eu me importo se a mesa está bem arrumada

- Discorda plenamente
  - Discorda
  - Discorda parcialmente
  - Nem concorda ou discorda
  - Concorda parcialmente
  - Concorda
  - Concorda plenamente
- 

## Health and Taste Attitude

---

Eu me preocupo em relação ao alimento ser saudável

- Discorda plenamente
- Discorda
- Discorda parcialmente
- Nem concorda ou discorda

- Concorda parcialmente
  - Concorda
  - Concorda plenamente
- 

Eu sempre sigo uma dieta saudável e balanceada

- Discorda plenamente
  - Discorda
  - Discorda parcialmente
  - Nem concorda ou discorda
  - Concorda parcialmente
  - Concorda
  - Concorda plenamente
- 

Na minha opinião, é importante uma dieta com baixo teor de gordura

- Discorda plenamente
  - Discorda
  - Discorda parcialmente
  - Nem concorda ou discorda
  - Concorda parcialmente
  - Concorda
  - Concorda plenamente
- 

É importante que a minha dieta diária tenha diversas vitaminas e minerais

- Discorda plenamente
- Discorda
- Discorda parcialmente
- Nem concorda ou discorda
- Concorda parcialmente
- Concorda

Concorda plenamente

---

Eu como o que gosto sem me preocupar com o quanto o alimento é saudável!

- Discorda plenamente
  - Discorda
  - Discorda parcialmente
  - Nem concorda ou discorda
  - Concorda parcialmente
  - Concorda
  - Concorda plenamente
- 

Mesmo que um alimento aumente o meu colesterol, eu não o evito

- Discorda plenamente
  - Discorda
  - Discorda parcialmente
  - Nem concorda ou discorda
  - Concorda parcialmente
  - Concorda
  - Concorda plenamente
- 

O quanto um alimento é saudável, pouco influencia nas minhas escolhas alimentares

- Discorda plenamente
- Discorda
- Discorda parcialmente
- Nem concorda ou discorda
- Concorda parcialmente
- Concorda
- Concorda plenamente



---

O quanto um lanche ou aperitivo é saudável, não faz diferença para mim

- Discorda plenamente
  - Discorda
  - Discorda parcialmente
  - Nem concorda ou discorda
  - Concorda parcialmente
  - Concorda
  - Concorda plenamente
- 

Eu não acredito que o alimento tenha que ser sempre uma fonte de prazer

- Discorda plenamente
  - Discorda
  - Discorda parcialmente
  - Nem concorda ou discorda
  - Concorda parcialmente
  - Concorda
  - Concorda plenamente
- 

A aparência do alimento não faz diferença, na minha opinião

- Discorda plenamente
  - Discorda
  - Discorda parcialmente
  - Nem concorda ou discorda
  - Concorda parcialmente
  - Concorda
  - Concorda plenamente
-

Na minha opinião é importante comer alimentos deliciosos, tanto durante a semana como nos finais de semana

- Discorda plenamente
  - Discorda
  - Discorda parcialmente
  - Nem concorda ou discorda
  - Concorda parcialmente
  - Concorda
  - Concorda plenamente
- 

Quando eu como um alimento, concentro-me para apreciar o seu gosto

- Discorda plenamente
  - Discorda
  - Discorda parcialmente
  - Nem concorda ou discorda
  - Concorda parcialmente
  - Concorda
  - Concorda plenamente
- 

Mesmo que não goste do sabor da comida, eu a como

- Discorda plenamente
  - Discorda
  - Discorda parcialmente
  - Nem concorda ou discorda
  - Concorda parcialmente
  - Concorda
  - Concorda plenamente
-

Utilizo boa parte do meu final de semana para me alimentar de comidas deliciosas

- Discorda plenamente
  - Discorda
  - Discorda parcialmente
  - Nem concorda ou discorda
  - Concorda parcialmente
  - Concorda
  - Concorda plenamente
- 

## Neophobia

---

Frequentemente eu experimento comidas novas e diferentes

- Discorda plenamente
  - Discorda
  - Discorda parcialmente
  - Nem concorda ou discorda
  - Concorda parcialmente
  - Concorda
  - Concorda plenamente
- 

Eu desconfio de novos alimentos

- Discorda plenamente
- Discorda
- Discorda parcialmente
- Nem concorda ou discorda
- Concorda parcialmente
- Concorda
- Concorda plenamente

---

Se desconheço o que tem na comida, eu não experimento

- Discorda plenamente
  - Discorda
  - Discorda parcialmente
  - Nem concorda ou discorda
  - Concorda parcialmente
  - Concorda
  - Concorda plenamente
- 

Eu gosto de comidas de diferentes países

- Discorda plenamente
  - Discorda
  - Discorda parcialmente
  - Nem concorda ou discorda
  - Concorda parcialmente
  - Concorda
  - Concorda plenamente
- 

Comidas típicas de outros países parecem muito estranhas para se comer

- Discorda plenamente
  - Discorda
  - Discorda parcialmente
  - Nem concorda ou discorda
  - Concorda parcialmente
  - Concorda
  - Concorda plenamente
- 

Nas festas, eu experimento novos alimentos

- Discorda plenamente
  - Discorda
  - Discorda parcialmente
  - Nem concorda ou discorda
  - Concorda parcialmente
  - Concorda
  - Concorda plenamente
- 

Eu tenho medo de comer coisas sobre as quais nunca ouvi falar

- Discorda plenamente
  - Discorda
  - Discorda parcialmente
  - Nem concorda ou discorda
  - Concorda parcialmente
  - Concorda
  - Concorda plenamente
- 

Eu me preocupo muito com os alimentos que vou comer

- Discorda plenamente
  - Discorda
  - Discorda parcialmente
  - Nem concorda ou discorda
  - Concorda parcialmente
  - Concorda
  - Concorda plenamente
- 

Eu como de tudo.

- Discorda plenamente

- Discorda
  - Discorda parcialmente
  - Nem concorda ou discorda
  - Concorda parcialmente
  - Concorda
  - Concorda plenamente
- 

Eu gosto de provar novos restaurantes de comidas típicas ou estrangeiras

- Discorda plenamente
  - Discorda
  - Discorda parcialmente
  - Nem concorda ou discorda
  - Concorda parcialmente
  - Concorda
  - Concorda plenamente
- 

### Reasons for Starchy food choices(CATA)

---

Você consome arroz?

- Sim
  - Não
- 

**Quais as razões pelas quais você come arroz? (Marque todas as respostas que correspondem)**

- ... porque eu vejo propaganda em algum lugar ou na TV
- ... porque me faz parecer melhor na frente dos outros
- ... porque deixa as reuniões sociais mais agradáveis

- ... porque é orgânico
- ... porque estou faminto
- ... porque eu curto
- ... porque me atrai aparentemente, por exemplo cores atraentes
- ... para compensar
- ... porque eu estou triste
- ... porque é mais conveniente
- ... porque eu tenho vontade de comer isso
- ... porque me mantém em forma exemplo, vigoroso, dinâmico
- ... porque tem pouca gordura
- ... porque é rápido de preparar
- ... porque não contém substâncias perigosas como agrotóxicos, poluentes, antibióticos
- ... porque estou frustrado
- ... porque é fácil de preparar
- ... porque me dou ao luxo
- ... porque eu me sinto sozinho
- ... porque é natural (exemplo, não geneticamente modificado)
- ... porque está em promoção
- ... porque eu cresci comendo isso
- ... porque eu devo comer
- ... porque eu posso desfrutar o momento com outras pessoas
- ... porque eu gosto
- ... porque os outros gostam
- ... porque estou habituado
- ... porque seria falta de educação não comer isso
- ... porque eu preciso de energia
- ... porque tem baixas calorias
- ... porque me sacia de forma agradável
- ... porque é moda
- ... porque é sociável
- ... porque é a única escolha
- ... porque me é familiar

- ... para manter uma dieta balanceada
- ... porque é saudável
- ... porque a apresentação é atraente, por exemplo a embalagem
- ... porque eu controlo meu peso
- ... porque faz parte de certas situações
- ... porque é saboroso
- ... porque normalmente eu como isso
- ... porque eu não quero gastar muito dinheiro
- ... para não desapontar alguém que está tentando me agradar
- ... porque eu quero comer todos os dias
- ... porque não faz parte das tradições como Natal, Ano Novo e ocasiões especiais
- ... porque não é caro

---

**Quais as razões pelas quais você não come arroz? (Marque todas as respostas que correspondem)**

- ... Eu não devo comer isso
- ... Comer isso me faz parecer antiquado
- ... Eu não quero me dar ao luxo
- ... Não é saudável
- ... O tamanho da porção não é adequado
- ... Eu não gosto do jeito que parece
- ... O preço está muito alto
- ... Eu nunca escolheria isso e eu gosto de comer a mesma comida todos os dias
- .. Eu comi recentemente e não quero comer a mesma comida com tanta frequência
- ... Essa comida me faz sentir triste, solitário e frustrado
- ... Não sustenta o suficiente
- ... Eu não gosto disso
- ... Não é conveniente
- ... Não é apropriado para a situação
- ... Eu normalmente não como isso



- .. Não é nada que eu queira comer agora
  - ... Muito rico em calorias
  - ... Não é um alimento que eu como perto de outras pessoas
  - ... Não é orgânico
  - ... Eu não acho que seja um lanche
- 

## Reasons for Protein foods Choices(CATA)

---

Você consome feijão?

- Sim
  - Não
- 

**Quais as razões pelas quais você come feijão? (Marque todas as respostas que correspondem)**

- ... porque é saboroso
- ... porque não contém substâncias perigosas como agrotóxicos, poluentes, antibióticos
- ... porque a apresentação é atraente, por exemplo a embalagem
- ... porque eu me sinto sozinho
- ... porque é fácil de preparar
- ... porque não é caro
- ... porque eu quero comer todos os dias
- ... porque seria falta de educação não comer isso
- ... porque é moda
- ... porque tem pouca gordura
- ... porque eu gosto
- ... porque é saudável
- ... porque é natural (exemplo, não geneticamente modificado)
- ... porque me sacia de forma agradável

- ... porque eu não quero gastar muito dinheiro
- ... porque não faz parte das tradições como Natal, Ano Novo e ocasiões especiais
- ... porque eu vejo propaganda em algum lugar ou na TV
- ... porque os outros gostam
- ... porque faz parte de certas situações
- ... porque estou frustrado
- ... porque está em promoção
- ... porque é sociável
- ... porque eu curto
- ... porque me faz parecer melhor na frente dos outros
- ... porque eu cresci comendo isso
- ... porque eu posso desfrutar o momento com outras pessoas
- ... porque eu devo comer
- ... porque é mais conveniente
- ... porque normalmente eu como isso
- ... porque tem baixas calorias
- ... porque eu controlo meu peso
- ... porque é a única escolha
- ... porque eu preciso de energia
- ... porque eu estou triste
- ... para não desapontar alguém que está tentando me agradar
- ... porque é rápido de preparar
- ... porque eu tenho vontade de comer isso
- ... para compensar
- ... porque me dou ao luxo
- ... porque me mantém em forma exemplo, vigoroso, dinâmico
- ... porque estou habituado
- ... porque deixa as reuniões sociais mais agradáveis
- ... porque me é familiar
- ... porque estou faminto
- ... porque me atrai aparentemente, por exemplo cores atraentes
- ... porque é orgânico

... para manter uma dieta balanceada

---

### Quais as razões pelas quais você não come feijão? (Marque todas as respostas que correspondem)

- ... Não é saudável
  - ... O tamanho da porção não é adequado
  - .. Não é nada que eu queira comer agora
  - ... Eu não quero me dar ao luxo
  - ... Não é apropriado para a situação
  - ... Não sustenta o suficiente
  - ... Eu não gosto disso
  - ... Eu não gosto do jeito que parece
  - ... Eu nunca escolheria isso e eu gosto de comer a mesma comida todos os dias
  - ... Comer isso me faz parecer antiquado
  - ... Não é orgânico
  - ... Muito rico em calorias
  - ... Não é um alimento que eu como perto de outras pessoas
  - ... Eu normalmente não como isso
  - ... O preço está muito alto
  - .. Eu comi recentemente e não quero comer a mesma comida com tanta frequência
  - ... Essa comida me faz sentir triste, solitário e frustrado
  - ... Eu não acho que seja um lanche
  - ... Não é conveniente
  - ... Eu não devo comer isso
- 

### Reasons for Dairy Food Choices(CATA)

---

Você consome leite?

- Sim
- Não
- 

**Quais as razões pelas quais você come leite? (Marque todas as respostas que correspondem)**

- ... porque tem pouca gordura
- ... porque eu devo comer
- ... para não desapontar alguém que está tentando me agradar
- ... porque é sociável
- ... porque me sacia de forma agradável
- ... porque me dou ao luxo
- ... para compensar
- ... porque é orgânico
- ... porque eu posso desfrutar o momento com outras pessoas
- ... porque está em promoção
- ... porque eu curto
- ... porque estou frustrado
- ... porque os outros gostam
- ... para manter uma dieta balanceada
- ... porque deixa as reuniões sociais mais agradáveis
- ... porque estou faminto
- ... porque é mais conveniente
- ... porque eu controlo meu peso
- ... porque seria falta de educação não comer isso
- ... porque é saboroso
- ... porque eu estou triste
- ... porque me mantém em forma exemplo, vigoroso, dinâmico
- ... porque eu vejo propaganda em algum lugar ou na TV
- ... porque a apresentação é atraente, por exemplo a embalagem
- ... porque é fácil de preparar
- ... porque eu tenho vontade de comer isso

- ... porque me atrai aparentemente, por exemplo cores atraentes
- ... porque eu preciso de energia
- ... porque eu não quero gastar muito dinheiro
- ... porque é a única escolha
- ... porque não faz parte das tradições como Natal, Ano Novo e ocasiões especiais
- ... porque me é familiar
- ... porque faz parte de certas situações
- ... porque eu cresci comendo isso
- ... porque é rápido de preparar
- ... porque tem baixas calorias
- ... porque não contém substâncias perigosas como agrotóxicos, poluentes, antibióticos
- ... porque eu quero comer todos os dias
- ... porque não é caro
- ... porque é moda
- ... porque é saudável
- ... porque eu me sinto sozinho
- ... porque normalmente eu como isso
- ... porque eu gosto
- ... porque estou habituado
- ... porque me faz parecer melhor na frente dos outros
- ... porque é natural (exemplo, não geneticamente modificado)

---

**Quais as razões pelas quais você não come leite? (Marque todas as respostas que correspondem)**

- ... Não é um alimento que eu como perto de outras pessoas
- ... Eu não quero me dar ao luxo
- ... Não sustenta o suficiente
- ... Não é conveniente
- ... Não é saudável
- ... Eu nunca escolheria isso e eu gosto de comer a mesma comida todos os dias

- ... Eu não acho que seja um lanche
- ... Não é apropriado para a situação
- ... Eu não devo comer isso
- ... O tamanho da porção não é adequado
- ... Essa comida me faz sentir triste, solitário e frustrado
- ... Muito rico em calorias
- ... Eu não gosto do jeito que parece
- ... Não é orgânico
- ... Eu normalmente não como isso
- ... Comer isso me faz parecer antiquado
- .. Eu comi recentemente e não quero comer a mesma comida com tanta frequência
- ... O preço está muito alto
- ... Eu não gosto disso
- .. Não é nada que eu queira comer agora

---

## Reasons for Fruit Choices(CATA)

---

Você consome banana?

- Sim
- Não

---

**Quais as razões pelas quais você come banana? (Marque todas as respostas que correspondem)**

- ... porque eu posso desfrutar o momento com outras pessoas
- ... para manter uma dieta balanceada
- ... porque não faz parte das tradições como Natal, Ano Novo e ocasiões especiais
- ... porque deixa as reuniões sociais mais agradáveis
- ... porque não é caro

- ... porque é fácil de preparar
- ... porque estou habituado
- ... porque estou frustrado
- ... porque eu cresci comendo isso
- ... porque eu quero comer todos os dias
- ... porque é rápido de preparar
- ... porque é saudável
- ... porque a apresentação é atraente, por exemplo a embalagem
- ... porque me atrai aparentemente, por exemplo cores atraentes
- ... porque normalmente eu como isso
- ... porque eu curto
- ... porque é saboroso
- ... porque eu me sinto sozinho
- ... porque é mais conveniente
- ... porque me faz parecer melhor na frente dos outros
- ... porque eu devo comer
- ... porque é moda
- ... porque me dou ao luxo
- ... porque eu preciso de energia
- ... porque me mantém em forma exemplo, vigoroso, dinâmico
- ... porque estou faminto
- ... porque não contém substâncias perigosas como agrotóxicos, poluentes, antibióticos
- ... porque os outros gostam
- ... porque tem pouca gordura
- ... porque está em promoção
- ... porque é sociável
- ... porque eu gosto
- ... porque eu vejo propaganda em algum lugar ou na TV
- ... porque seria falta de educação não comer isso
- ... porque tem baixas calorias
- ... porque é orgânico
- ... porque faz parte de certas situações

- ... porque eu tenho vontade de comer isso
  - ... porque eu controlo meu peso
  - ... para não desapontar alguém que está tentando me agradar
  - ... porque eu estou triste
  - ... porque me sacia de forma agradável
  - ... porque é a única escolha
  - ... porque eu não quero gastar muito dinheiro
  - ... porque é natural (exemplo, não geneticamente modificado)
  - ... para compensar
  - ... porque me é familiar
- 

**Quais as razões pelas quais você não come banana? (Marque todas as respostas que correspondem)**

- ... Eu nunca escolheria isso e eu gosto de comer a mesma comida todos os dias
- .. Não é nada que eu queira comer agora
- ... Não é conveniente
- ... Essa comida me faz sentir triste, solitário e frustrado
- ... Não é apropriado para a situação
- ... Não sustenta o suficiente
- .. Eu comi recentemente e não quero comer a mesma comida com tanta frequência
- ... Eu não gosto do jeito que parece
- ... Comer isso me faz parecer antiquado
- ... O tamanho da porção não é adequado
- ... Eu não gosto disso
- ... O preço está muito alto
- ... Eu não quero me dar ao luxo
- ... Eu não acho que seja um lanche
- ... Eu não devo comer isso
- ... Muito rico em calorias
- ... Não é um alimento que eu como perto de outras pessoas



- ... Não é saudável
  - ... Não é orgânico
  - ... Eu normalmente não como isso
- 

## Reasons for Sweet food Choices(CATA)

---

Você consome brigadeiro?

- Sim
  - Não
- 

**Quais as razões pelas quais você come brigadeiro? (Marque todas as respostas que correspondem)**

- ... porque me mantém em forma exemplo, vigoroso, dinâmico
- ... porque faz parte de certas situações
- ... porque estou habituado
- ... porque a apresentação é atraente, por exemplo a embalagem
- ... porque os outros gostam
- ... porque eu não quero gastar muito dinheiro
- ... porque deixa as reuniões sociais mais agradáveis
- ... porque é moda
- ... porque estou faminto
- ... porque eu curto
- ... para compensar
- ... porque estou frustrado
- ... porque eu vejo propaganda em algum lugar ou na TV
- ... porque eu posso desfrutar o momento com outras pessoas
- ... porque eu controlo meu peso
- ... porque é mais conveniente
- ... porque tem pouca gordura

- ... porque é fácil de preparar
- ... porque é orgânico
- ... porque eu quero comer todos os dias
- ... porque é rápido de preparar
- ... porque normalmente eu como isso
- ... porque não é caro
- ... porque tem baixas calorias
- ... porque é saboroso
- ... porque é saudável
- ... porque me dou ao luxo
- ... porque eu me sinto sozinho
- ... porque me faz parecer melhor na frente dos outros
- ... porque me sacia de forma agradável
- ... porque eu devo comer
- ... porque não contém substâncias perigosas como agrotóxicos, poluentes, antibióticos
- ... porque me é familiar
- ... porque é sociável
- ... porque não faz parte das tradições como Natal, Ano Novo e ocasiões especiais
- ... porque seria falta de educação não comer isso
- ... porque está em promoção
- ... porque eu preciso de energia
- ... porque eu estou triste
- ... porque é natural (exemplo, não geneticamente modificado)
- ... porque me atrai aparentemente, por exemplo cores atraentes
- ... porque eu tenho vontade de comer isso
- ... porque é a única escolha
- ... para não desapontar alguém que está tentando me agradar
- ... para manter uma dieta balanceada
- ... porque eu cresci comendo isso
- ... porque eu gosto

## Quais as razões pelas quais você não come brigadeiro? (Marque todas as respostas que correspondem)

- ... Eu não gosto disso
- ... O preço está muito alto
- ... Eu não quero me dar ao luxo
- ... Não é um alimento que eu como perto de outras pessoas
- ... Eu não gosto do jeito que parece
- .. Eu comi recentemente e não quero comer a mesma comida com tanta frequência
- ... Não sustenta o suficiente
- ... O tamanho da porção não é adequado
- ... Eu não acho que seja um lanche
- ... Não é conveniente
- ... Não é apropriado para a situação
- ... Não é orgânico
- ... Eu normalmente não como isso
- ... Comer isso me faz parecer antiquado
- ... Não é saudável
- ... Eu nunca escolheria isso e eu gosto de comer a mesma comida todos os dias
- ... Muito rico em calorias
- .. Não é nada que eu queira comer agora
- ... Essa comida me faz sentir triste, solitário e frustrado
- ... Eu não devo comer isso

---

## JAR & Liking

---

O quanto você achou essa pesquisa curta ou longa?

- Curta demais
- Muito curta
- Um pouco curta

- Ideal
  - Um pouco longa
  - Muito longa
  - Longa demais
- 

Como você se sentiu ao término dessa pesquisa?

- Eu adorei responder
  - Eu gostei muito de responder
  - Indiferente
  - Eu não gostei muito de responder
  - Eu odiei responder
- 

### Reasons for Starchy food choices(Full CATA)

---

Você come arroz?

- Sim
  - Não
- 

Você come arroz porque está habituado?

- Sim
  - Não
- 

Você come arroz porque é saudável?

- Sim
  - Não
-

Você come arroz porque é rápido de preparar?

- Sim  
 Não
- 

Você come arroz porque é saboroso?

- Sim  
 Não
- 

Você come arroz porque se dá ao luxo de comer?

- Sim  
 Não
- 

Você come arroz porque é natural (exemplo, não geneticamente modificado)?

- Sim  
 Não
- 

Você come arroz porque não quer gastar muito dinheiro?

- Sim  
 Não
- 

Você come arroz porque tem baixas calorias?

- Sim  
 Não
-

Você come arroz porque está frustrado?

- Sim  
 Não
- 

Você come arroz porque te faz parecer melhor na frente dos outros?

- Sim  
 Não
- 

Você come arroz porque seria falta de educação não comer?

- Sim  
 Não
- 

Você come arroz porque a apresentação é atraente, por exemplo a embalagem?

- Sim  
 Não
- 

Você come arroz para poder desfrutar o momento com outras pessoas?

- Sim  
 Não
- 

Você come arroz porque é orgânico?

- Sim  
 Não
-

Você come arroz porque cresceu comendo isso?

- Sim  
 Não
- 

Você come arroz porque curte?

- Sim  
 Não
- 

Você come arroz porque está faminto?

- Sim  
 Não
- 

Você come arroz porque faz parte do hábito?

- Sim  
 Não
- 

Você come arroz porque tem vontade de comer isso?

- Sim  
 Não
- 

Você come arroz porque é fácil de preparar?

- Sim  
 Não
-

Você come arroz porque fica triste?

- Sim  
 Não
- 

Você come arroz porque tem pouca gordura?

- Sim  
 Não
- 

Você come arroz porque vê propaganda em algum lugar ou na TV?

- Sim  
 Não
- 

Você come arroz porque deixa as reuniões sociais mais agradáveis?

- Sim  
 Não
- 

Você come arroz porque deve comer?

- Sim  
 Não
- 

Você come arroz porque os outros gostam?

- Sim  
 Não
-



Você come arroz porque se sente sozinho?

- Sim  
 Não
- 

Você come arroz porque controla seu peso?

- Sim  
 Não
- 

Você come arroz porque não contém substâncias perigosas como agrotóxicos, poluentes e ou antibióticos?

- Sim  
 Não
- 

Você come arroz porque é mais conveniente?

- Sim  
 Não
- 

Você come arroz porque precisa de energia?

- Sim  
 Não
- 

Você come arroz porque lhe é familiar?

- Sim  
 Não
-

Você come arroz porque gosta?

- Sim  
 Não
- 

Você come arroz porque te sacia de forma agradável?

- Sim  
 Não
- 

Você come arroz para compensar?

- Sim  
 Não
- 

Você come arroz porque não faz parte das tradições como Natal, Ano Novo ou outras ocasiões especiais?

- Sim  
 Não
- 

Você come arroz porque faz parte de certas situações?

- Sim  
 Não
- 

Você come arroz para manter uma dieta balanceada?

- Sim  
 Não
-

Você come arroz porque é sociável?

- Sim  
 Não
- 

Você come arroz porque não é caro?

- Sim  
 Não
- 

Você come arroz porque te atrai aparentemente como por exemplo as cores atraentes?

- Sim  
 Não
- 

Você come arroz para não desapontar alguém que está tentando te agradar?

- Sim  
 Não
- 

Você come arroz porque é moda?

- Sim  
 Não
- 

Você come arroz porque está em promoção?

- Sim  
 Não
-

Você come arroz porque te mantém em forma, vigoroso, dinâmico?

- Sim  
 Não
- 

Você come arroz porque é a única escolha?

- Sim  
 Não
- 

Você come arroz porque quer comer todos os dias?

- Sim  
 Não
- 

Você não come arroz porque pensa que não é um lanche?

- Sim  
 Não
- 

Você não come arroz porque não gosta?

- Sim  
 Não
- 

Você não come arroz porque normalmente não come?

- Sim  
 Não
-

Você não come arroz porque o tamanho da porção não é adequado?

- Sim  
 Não
- 

Você não come arroz porque não sustenta o suficiente?

- Sim  
 Não
- 

Você não come arroz porque não é saudável?

- Sim  
 Não
- 

Você não come arroz porque não é conveniente?

- Sim  
 Não
- 

Você não come arroz porque não quer se dar ao luxo?

- Sim  
 Não
- 

Você não come arroz porque não é apropriado para a situação?

- Sim  
 Não

---

Você não come arroz porque não é um alimento que se come perto de outras pessoas?

- Sim
- Não
- 

Você não come arroz porque o preço está muito alto?

- Sim
- Não
- 

Você não come arroz porque não gosta do jeito que parece?

- Sim
- Não
- 

Você não come arroz porque é muito rico em calorias?

- Sim
- Não
- 

Você não come arroz porque não deve comer isso?

- Sim
- Não
- 

Você não come arroz porque comer isso te faz parecer antiquado?

- Sim
- Não
-

Você não come arroz porque não é algo que queira comer agora?

- Sim  
 Não
- 

Você não come arroz porque comeu recentemente e não quer comer a mesma comida com tanta frequência?

- Sim  
 Não
- 

Você não come arroz porque nunca escolheria isso, já que gosta de comer a mesma comida todo dia?

- Sim  
 Não
- 

Você não come arroz porque essa comida te faz se sentir triste, solitário e frustrado?

- Sim  
 Não
- 

Você não come arroz porque não é orgânico

- Sim  
 Não
- 

## Reasons for Protein foods Choices(Full CATA)

---

Você come feijão?

- Sim  
 Não

---

Você come feijão porque está habituado?

- Sim  
 Não
- 

Você come feijão porque é saudável?

- Sim  
 Não
- 

Você come feijão porque é rápido de preparar?

- Sim  
 Não
- 

Você come feijão porque é saboroso?

- Sim  
 Não
- 

Você come feijão porque se dá ao luxo de comer?

- Sim  
 Não
- 

Você come feijão porque é natural (exemplo, não geneticamente modificado)?

- Sim  
 Não
-



Você come feijão porque não quer gastar muito dinheiro?

- Sim  
 Não
- 

Você come feijão porque tem baixas calorias?

- Sim  
 Não
- 

Você come feijão porque está frustrado?

- Sim  
 Não
- 

Você come feijão porque te faz parecer melhor na frente dos outros?

- Sim  
 Não
- 

Você come feijão porque seria falta de educação não comer?

- Sim  
 Não
- 

Você come feijão porque a apresentação é atraente, por exemplo a embalagem?

- Sim  
 Não
-

Você come feijão para poder desfrutar o momento com outras pessoas?

- Sim  
 Não
- 

Você come feijão porque é orgânico?

- Sim  
 Não
- 

Você come feijão porque cresceu comendo isso?

- Sim  
 Não
- 

Você come feijão porque curte?

- Sim  
 Não
- 

Você come feijão porque está faminto?

- Sim  
 Não
- 

Você come feijão porque faz parte do hábito?

- Sim  
 Não
-

Você come feijão porque tem vontade de comer isso?

- Sim  
 Não
- 

Você come feijão porque é fácil de preparar?

- Sim  
 Não
- 

Você come feijão porque fica triste?

- Sim  
 Não
- 

Você come feijão porque tem pouca gordura?

- Sim  
 Não
- 

Você come feijão porque vê propaganda em algum lugar ou na TV?

- Sim  
 Não
- 

Você come feijão porque deixa as reuniões sociais mais agradáveis?

- Sim  
 Não
-

Você come feijão porque deve comer?

- Sim  
 Não
- 

Você come feijão porque os outros gostam?

- Sim  
 Não
- 

Você come feijão porque se sente sozinho?

- Sim  
 Não
- 

Você come feijão porque controla seu peso?

- Sim  
 Não
- 

Você come feijão porque não contém substâncias perigosas como agrotóxicos, poluentes e ou antibióticos?

- Sim  
 Não
- 

Você come feijão porque é mais conveniente?

- Sim  
 Não
-

Você come feijão porque precisa de energia?

- Sim  
 Não
- 

Você come feijão porque lhe é familiar?

- Sim  
 Não
- 

Você come feijão porque gosta?

- Sim  
 Não
- 

Você come feijão porque te sacia de forma agradável?

- Sim  
 Não
- 

Você come feijão para compensar?

- Sim  
 Não
- 

Você come feijão porque não faz parte das tradições como Natal, Ano Novo ou outras ocasiões especiais?

- Sim  
 Não
-

Você come feijão porque faz parte de certas situações?

- Sim  
 Não
- 

Você come feijão para manter uma dieta balanceada?

- Sim  
 Não
- 

Você come feijão porque é sociável?

- Sim  
 Não
- 

Você come feijão porque não é caro?

- Sim  
 Não
- 

Você come feijão porque te atrai aparentemente como por exemplo as cores atraentes?

- Sim  
 Não
- 

Você come feijão para não desapontar alguém que está tentando te agradar?

- Sim  
 Não
-

Você come feijão porque é moda?

- Sim  
 Não
- 

Você come feijão porque está em promoção?

- Sim  
 Não
- 

Você come feijão porque te mantém em forma, vigoroso, dinâmico?

- Sim  
 Não
- 

Você come feijão porque é a única escolha?

- Sim  
 Não
- 

Você come feijão porque quer comer todos os dias?

- Sim  
 Não
- 

Você não come feijão porque pensa que não é um lanche?

- Sim  
 Não
-

Você não come feijão porque não gosta?

- Sim  
 Não
- 

Você não come feijão porque normalmente não come?

- Sim  
 Não
- 

Você não come feijão porque o tamanho da porção não é adequado?

- Sim  
 Não
- 

Você não come feijão porque não sustenta o suficiente?

- Sim  
 Não
- 

Você não come feijão porque não é saudável?

- Sim  
 Não
- 

Você não come feijão porque não é conveniente?

- Sim  
 Não
-



Você não come feijão porque não quer se dar ao luxo?

- Sim
- Não
- 

Você não come feijão porque não é apropriado para a situação?

- Sim
- Não
- 

Você não come feijão porque não é um alimento que se come perto de outras pessoas?

- Sim
- Não
- 

Você não come feijão porque o preço está muito alto?

- Sim
- Não
- 

Você não come feijão porque não gosta do jeito que parece?

- Sim
- Não
- 

Você não come feijão porque é muito rico em calorias?

- Sim
- Não

---

Você não come feijão porque não deve comer isso?

- Sim
- Não
- 

Você não come feijão porque comer isso te faz parecer antiquado?

- Sim
- Não
- 

Você não come feijão porque não é algo que queira comer agora?

- Sim
- Não
- 

Você não come feijão porque comeu recentemente e não quer comer a mesma comida com tanta frequência?

- Sim
- Não
- 

Você não come feijão porque nunca escolheria isso, já que gosta de comer a mesma comida todo dia?

- Sim
- Não
- 

Você não come feijão porque essa comida te faz se sentir triste, solitário e frustrado?

- Sim
- Não
-

Você não come feijão porque não é orgânico

- Sim
- Não
- 

## Reasons for Dairy Food Choices(Full CATA)

---

Você come leite?

- Sim
- Não
- 

Você come leite porque está habituado?

- Sim
- Não
- 

Você come leite porque é saudável?

- Sim
- Não
- 

Você come leite porque é rápido de preparar?

- Sim
- Não
- 

Você come leite porque é saboroso?

- Sim
- Não

---

Você come leite porque se dá ao luxo de comer?

- Sim
- Não
- 

Você come leite porque é natural (exemplo, não geneticamente modificado)?

- Sim
- Não
- 

Você come leite porque não quer gastar muito dinheiro?

- Sim
- Não
- 

Você come leite porque tem baixas calorias?

- Sim
- Não
- 

Você come leite porque está frustrado?

- Sim
- Não
- 

Você come leite porque te faz parecer melhor na frente dos outros?

- Sim
- Não
-

Você come leite porque seria falta de educação não comer?

- Sim  
 Não
- 

Você come leite porque a apresentação é atraente, por exemplo a embalagem?

- Sim  
 Não
- 

Você come leite para poder desfrutar o momento com outras pessoas?

- Sim  
 Não
- 

Você come leite porque é orgânico?

- Sim  
 Não
- 

Você come leite porque cresceu comendo isso?

- Sim  
 Não
- 

Você come leite porque curte?

- Sim  
 Não
-

Você come leite porque está faminto?

- Sim  
 Não
- 

Você come leite porque faz parte do hábito?

- Sim  
 Não
- 

Você come leite porque tem vontade de comer isso?

- Sim  
 Não
- 

Você come leite porque é fácil de preparar?

- Sim  
 Não
- 

Você come leite porque fica triste?

- Sim  
 Não
- 

Você come leite porque tem pouca gordura?

- Sim  
 Não
-

Você come leite porque vê propaganda em algum lugar ou na TV?

- Sim  
 Não
- 

Você come leite porque deixa as reuniões sociais mais agradáveis?

- Sim  
 Não
- 

Você come leite porque deve comer?

- Sim  
 Não
- 

Você come leite porque os outros gostam?

- Sim  
 Não
- 

Você come leite porque se sente sozinho?

- Sim  
 Não
- 

Você come leite porque controla seu peso?

- Sim  
 Não
-

Você come leite porque não contém substâncias perigosas como agrotóxicos, poluentes e ou antibióticos?

- Sim  
 Não
- 

Você come leite porque é mais conveniente?

- Sim  
 Não
- 

Você come leite porque precisa de energia?

- Sim  
 Não
- 

Você come leite porque lhe é familiar?

- Sim  
 Não
- 

Você come leite porque gosta?

- Sim  
 Não
- 

Você come leite porque te sacia de forma agradável?

- Sim  
 Não
-



Você come leite para compensar?

- Sim  
 Não
- 

Você come leite porque não faz parte das tradições como Natal, Ano Novo ou outras ocasiões especiais?

- Sim  
 Não
- 

Você come leite porque faz parte de certas situações?

- Sim  
 Não
- 

Você come leite para manter uma dieta balanceada?

- Sim  
 Não
- 

Você come leite porque é sociável?

- Sim  
 Não
- 

Você come leite porque não é caro?

- Sim  
 Não
-

Você come leite porque te atrai aparentemente como por exemplo as cores atraentes?

- Sim  
 Não
- 

Você come leite para não desapontar alguém que está tentando te agradar?

- Sim  
 Não
- 

Você come leite porque é moda?

- Sim  
 Não
- 

Você come leite porque está em promoção?

- Sim  
 Não
- 

Você come leite porque te mantém em forma, vigoroso, dinâmico?

- Sim  
 Não
- 

Você come leite porque é a única escolha?

- Sim  
 Não
-

Você come leite porque quer comer todos os dias?

- Sim  
 Não
- 

Você não come leite porque pensa que não é um lanche?

- Sim  
 Não
- 

Você não come leite porque não gosta?

- Sim  
 Não
- 

Você não come leite porque normalmente não come?

- Sim  
 Não
- 

Você não come leite porque o tamanho da porção não é adequado?

- Sim  
 Não
- 

Você não come leite porque não sustenta o suficiente?

- Sim  
 Não
-

Você não come leite porque não é saudável?

- Sim  
 Não
- 

Você não come leite porque não é conveniente?

- Sim  
 Não
- 

Você não come leite porque não quer se dar ao luxo?

- Sim  
 Não
- 

Você não come leite porque não é apropriado para a situação?

- Sim  
 Não
- 

Você não come leite porque não é um alimento que se come perto de outras pessoas?

- Sim  
 Não
- 

Você não come leite porque o preço está muito alto?

- Sim  
 Não

---

Você não come leite porque não gosta do jeito que parece?

- Sim
- Não
- 

Você não come leite porque é muito rico em calorias?

- Sim
- Não
- 

Você não come leite porque não deve comer isso?

- Sim
- Não
- 

Você não come leite porque comer isso te faz parecer antiquado?

- Sim
- Não
- 

Você não come leite porque não é algo que queira comer agora?

- Sim
- Não
- 

Você não come leite porque comeu recentemente e não quer comer a mesma comida com tanta frequência?

- Sim
- Não
-

Você não come leite porque nunca escolheria isso, já que gosta de comer a mesma comida todo dia?

- Sim  
 Não
- 

Você não come leite porque essa comida te faz se sentir triste, solitário e frustrado?

- Sim  
 Não
- 

Você não come leite porque não é orgânico

- Sim  
 Não
- 

## Reasons for Fruit Choices(Full CATA)

---

Você come banana?

- Sim  
 Não
- 

Você come banana porque está habituado?

- Sim  
 Não
- 

Você come banana porque é saudável?

- Sim  
 Não

---

Você come banana porque é rápido de preparar?

- Sim
- Não
- 

Você come banana porque é saboroso?

- Sim
- Não
- 

Você come banana porque se dá ao luxo de comer?

- Sim
- Não
- 

Você come banana porque é natural (exemplo, não geneticamente modificado)?

- Sim
- Não
- 

Você come banana porque não quer gastar muito dinheiro?

- Sim
- Não
- 

Você come banana porque tem baixas calorias?

- Sim
- Não
-

Você come banana porque está frustrado?

- Sim  
 Não
- 

Você come banana porque te faz parecer melhor na frente dos outros?

- Sim  
 Não
- 

Você come banana porque seria falta de educação não comer?

- Sim  
 Não
- 

Você come banana porque a apresentação é atraente, por exemplo a embalagem?

- Sim  
 Não
- 

Você come banana para poder desfrutar o momento com outras pessoas?

- Sim  
 Não
- 

Você come banana porque é orgânico?

- Sim  
 Não
-



Você come banana porque cresceu comendo isso?

- Sim  
 Não
- 

Você come banana porque curte?

- Sim  
 Não
- 

Você come banana porque está faminto?

- Sim  
 Não
- 

Você come banana porque faz parte do hábito?

- Sim  
 Não
- 

Você come banana porque tem vontade de comer isso?

- Sim  
 Não
- 

Você come banana porque é fácil de preparar?

- Sim  
 Não
-

Você come banana porque fica triste?

- Sim  
 Não
- 

Você come banana porque tem pouca gordura?

- Sim  
 Não
- 

Você come banana porque vê propaganda em algum lugar ou na TV?

- Sim  
 Não
- 

Você come banana porque deixa as reuniões sociais mais agradáveis?

- Sim  
 Não
- 

Você come banana porque deve comer?

- Sim  
 Não
- 

Você come banana porque os outros gostam?

- Sim  
 Não
-

Você come banana porque se sente sozinho?

- Sim  
 Não
- 

Você come banana porque controla seu peso?

- Sim  
 Não
- 

Você come banana porque não contém substâncias perigosas como agrotóxicos, poluentes e ou antibióticos?

- Sim  
 Não
- 

Você come banana porque é mais conveniente?

- Sim  
 Não
- 

Você come banana porque precisa de energia?

- Sim  
 Não
- 

Você come banana porque lhe é familiar?

- Sim  
 Não
-

Você come banana porque gosta?

- Sim  
 Não
- 

Você come banana porque te sacia de forma agradável?

- Sim  
 Não
- 

Você come banana para compensar?

- Sim  
 Não
- 

Você come banana porque não faz parte das tradições como Natal, Ano Novo ou outras ocasiões especiais?

- Sim  
 Não
- 

Você come banana porque faz parte de certas situações?

- Sim  
 Não
- 

Você come banana para manter uma dieta balanceada?

- Sim  
 Não
-

Você come banana porque é sociável?

- Sim  
 Não
- 

Você come banana porque não é caro?

- Sim  
 Não
- 

Você come banana porque te atrai aparentemente como por exemplo as cores atraentes?

- Sim  
 Não
- 

Você come banana para não desapontar alguém que está tentando te agradar?

- Sim  
 Não
- 

Você come banana porque é moda?

- Sim  
 Não
- 

Você come banana porque está em promoção?

- Sim  
 Não
-

Você come banana porque te mantém em forma, vigoroso, dinâmico?

- Sim  
 Não
- 

Você come banana porque é a única escolha?

- Sim  
 Não
- 

Você come banana porque quer comer todos os dias?

- Sim  
 Não
- 

Você não come banana porque pensa que não é um lanche?

- Sim  
 Não
- 

Você não come banana porque não gosta?

- Sim  
 Não
- 

Você não come banana porque normalmente não come?

- Sim  
 Não
-

Você não come banana porque o tamanho da porção não é adequado?

- Sim
- Não
- 

Você não come banana porque não sustenta o suficiente?

- Sim
- Não
- 

Você não come banana porque não é saudável?

- Sim
- Não
- 

Você não come banana porque não é conveniente?

- Sim
- Não
- 

Você não come banana porque não quer se dar ao luxo?

- Sim
- Não
- 

Você não come banana porque não é apropriado para a situação?

- Sim
- Não

---

Você não come banana porque não é um alimento que se come perto de outras pessoas?

- Sim
- Não
- 

Você não come banana porque o preço está muito alto?

- Sim
- Não
- 

Você não come banana porque não gosta do jeito que parece?

- Sim
- Não
- 

Você não come banana porque é muito rico em calorias?

- Sim
- Não
- 

Você não come banana porque não deve comer isso?

- Sim
- Não
- 

Você não come banana porque comer isso te faz parecer antiquado?

- Sim
- Não
-



Você não come banana porque não é algo que queira comer agora?

- Sim  
 Não
- 

Você não come banana porque comeu recentemente e não quer comer a mesma comida com tanta frequência?

- Sim  
 Não
- 

Você não come banana porque nunca escolheria isso, já que gosta de comer a mesma comida todo dia?

- Sim  
 Não
- 

Você não come banana porque essa comida te faz se sentir triste, solitário e frustrado?

- Sim  
 Não
- 

Você não come banana porque não é orgânico

- Sim  
 Não
- 

## Reasons for Sweet food Choices(Full CATA)

---

Você come brigadeiro?

- Sim  
 Não

---

Você come brigadeiro porque está habituado?

- Sim
- Não
- 

Você come brigadeiro porque é saudável?

- Sim
- Não
- 

Você come brigadeiro porque é rápido de preparar?

- Sim
- Não
- 

Você come brigadeiro porque é saboroso?

- Sim
- Não
- 

Você come brigadeiro porque se dá ao luxo de comer?

- Sim
- Não
- 

Você come brigadeiro porque é natural (exemplo, não geneticamente modificado)?

- Sim
- Não
-

Você come brigadeiro porque não quer gastar muito dinheiro?

- Sim  
 Não
- 

Você come brigadeiro porque tem baixas calorias?

- Sim  
 Não
- 

Você come brigadeiro porque está frustrado?

- Sim  
 Não
- 

Você come brigadeiro porque te faz parecer melhor na frente dos outros?

- Sim  
 Não
- 

Você come brigadeiro porque seria falta de educação não comer?

- Sim  
 Não
- 

Você come brigadeiro porque a apresentação é atraente, por exemplo a embalagem?

- Sim  
 Não
-

Você come brigadeiro para poder desfrutar o momento com outras pessoas?

- Sim  
 Não
- 

Você come brigadeiro porque é orgânico?

- Sim  
 Não
- 

Você come brigadeiro porque cresceu comendo isso?

- Sim  
 Não
- 

Você come brigadeiro porque curte?

- Sim  
 Não
- 

Você come brigadeiro porque está faminto?

- Sim  
 Não
- 

Você come brigadeiro porque faz parte do hábito?

- Sim  
 Não
-

Você come brigadeiro porque tem vontade de comer isso?

- Sim  
 Não
- 

Você come brigadeiro porque é fácil de preparar?

- Sim  
 Não
- 

Você come brigadeiro porque fica triste?

- Sim  
 Não
- 

Você come brigadeiro porque tem pouca gordura?

- Sim  
 Não
- 

Você come brigadeiro porque vê propaganda em algum lugar ou na TV?

- Sim  
 Não
- 

Você come brigadeiro porque deixa as reuniões sociais mais agradáveis?

- Sim  
 Não
-

Você come brigadeiro porque deve comer?

- Sim  
 Não
- 

Você come brigadeiro porque os outros gostam?

- Sim  
 Não
- 

Você come brigadeiro porque se sente sozinho?

- Sim  
 Não
- 

Você come brigadeiro porque controla seu peso?

- Sim  
 Não
- 

Você come brigadeiro porque não contém substâncias perigosas como agrotóxicos, poluentes e ou antibióticos?

- Sim  
 Não
- 

Você come brigadeiro porque é mais conveniente?

- Sim  
 Não
-

Você come brigadeiro porque precisa de energia?

- Sim  
 Não
- 

Você come brigadeiro porque lhe é familiar?

- Sim  
 Não
- 

Você come brigadeiro porque gosta?

- Sim  
 Não
- 

Você come brigadeiro porque te sacia de forma agradável?

- Sim  
 Não
- 

Você come brigadeiro para compensar?

- Sim  
 Não
- 

Você come brigadeiro porque não faz parte das tradições como Natal, Ano Novo ou outras ocasiões especiais?

- Sim  
 Não
-

Você come brigadeiro porque faz parte de certas situações?

- Sim  
 Não
- 

Você come brigadeiro para manter uma dieta balanceada?

- Sim  
 Não
- 

Você come brigadeiro porque é sociável?

- Sim  
 Não
- 

Você come brigadeiro porque não é caro?

- Sim  
 Não
- 

Você come brigadeiro porque te atrai aparentemente como por exemplo as cores atraentes?

- Sim  
 Não
- 

Você come brigadeiro para não desapontar alguém que está tentando te agradar?

- Sim  
 Não
-



Você come brigadeiro porque é moda?

- Sim  
 Não
- 

Você come brigadeiro porque está em promoção?

- Sim  
 Não
- 

Você come brigadeiro porque te mantém em forma, vigoroso, dinâmico?

- Sim  
 Não
- 

Você come brigadeiro porque é a única escolha?

- Sim  
 Não
- 

Você come brigadeiro porque quer comer todos os dias?

- Sim  
 Não
- 

Você não come brigadeiro porque pensa que não é um lanche?

- Sim  
 Não
-

Você não come brigadeiro porque não gosta?

- Sim  
 Não
- 

Você não come brigadeiro porque normalmente não come?

- Sim  
 Não
- 

Você não come brigadeiro porque o tamanho da porção não é adequado?

- Sim  
 Não
- 

Você não come brigadeiro porque não sustenta o suficiente?

- Sim  
 Não
- 

Você não come brigadeiro porque não é saudável?

- Sim  
 Não
- 

Você não come brigadeiro porque não é conveniente?

- Sim  
 Não
-

Você não come brigadeiro porque não quer se dar ao luxo?

- Sim
- Não
- 

Você não come brigadeiro porque não é apropriado para a situação?

- Sim
- Não
- 

Você não come brigadeiro porque não é um alimento que se come perto de outras pessoas?

- Sim
- Não
- 

Você não come brigadeiro porque o preço está muito alto?

- Sim
- Não
- 

Você não come brigadeiro porque não gosta do jeito que parece?

- Sim
- Não
- 

Você não come brigadeiro porque é muito rico em calorias?

- Sim
- Não

---

Você não come brigadeiro porque não deve comer isso?

- Sim
- Não
- 

Você não come brigadeiro porque comer isso te faz parecer antiquado?

- Sim
- Não
- 

Você não come brigadeiro porque não é algo que queira comer agora?

- Sim
- Não
- 

Você não come brigadeiro porque comeu recentemente e não quer comer a mesma comida com tanta frequência?

- Sim
- Não
- 

Você não come brigadeiro porque nunca escolheria isso, já que gosta de comer a mesma comida todo dia?

- Sim
- Não
- 

Você não come brigadeiro porque essa comida te faz se sentir triste, solitário e frustrado?

- Sim
- Não
-

---

Você não come brigadeiro porque não é orgânico

- Sim
- Não
- 

## Reasons for Starchy food choices(RATA)

---

Você consome arroz?

- Sim
- Não
- 

**Quais as razões pelas quais você come arroz? (Marque todas as respostas que correspondem)**

- ... porque não é caro
- ... para não desapontar alguém que está tentando me agradar
- ... porque tem pouca gordura
- ... porque eu posso desfrutar o momento com outras pessoas
- ... porque me sacia de forma agradável
- ... porque é mais conveniente
- ... porque seria falta de educação não comer isso
- ... porque é saboroso
- ... porque eu não quero gastar muito dinheiro
- ... porque eu me sinto sozinho
- ... porque faz parte de certas situações
- ... porque é rápido de preparar
- ... porque eu controlo meu peso
- ... porque estou faminto
- ... porque me atrai aparentemente, por exemplo cores atraentes

- ... porque estou frustrado
- ... porque eu preciso de energia
- ... porque a apresentação é atraente, por exemplo a embalagem
- ... porque é orgânico
- ... porque não contém substâncias perigosas como agrotóxicos, poluentes, antibióticos
- ... porque eu estou triste
- ... porque está em promoção
- ... porque me dou ao luxo
- ... porque é moda
- ... porque eu devo comer
- ... porque me mantém em forma exemplo, vigoroso, dinâmico
- ... porque tem baixas calorias
- ... porque é sociável
- ... porque estou habituado
- ... porque eu curto
- ... porque eu vejo propaganda em algum lugar ou vejo na TV
- ... porque eu cresci comendo isso
- ... porque é fácil de preparar
- ... porque os outros gostam
- ... porque me faz parecer melhor na frente dos outros
- ... porque me é familiar
- ... porque eu quero comer todos os dias
- ... porque não faz parte das tradições como Natal, Ano Novo e ocasiões especiais
- ... porque deixa as reuniões sociais mais agradáveis
- ... porque é natural (exemplo, não geneticamente modificado)
- ... porque eu tenho vontade de comer isso
- ... porque é saudável
- ... para manter uma dieta balanceada
- ... porque é a única escolha
- ... porque eu gosto
- ... para compensar
- ... porque normalmente eu como isso

---

Você selecionou "... porque estou habituado "

O quanto isso é importante para você?

- Extremamente importante
  - Muito importante
  - Moderadamente importante
  - Levemente importante
  - Nada importante
- 

Você selecionou "... porque é saudável "

O quanto isso é importante para você?

- Extremamente importante
  - Muito importante
  - Moderadamente importante
  - Levemente importante
  - Nada importante
- 

Você selecionou "... porque é rápido de preparar "

O quanto isso é importante para você?

- Extremamente importante
  - Muito importante
  - Moderadamente importante
  - Levemente importante
  - Nada importante
- 

Você selecionou "... porque é saboroso "

O quanto isso é importante para você?

- Extremamente importante

- Muito importante
  - Moderadamente importante
  - Levemente importante
  - Nada importante
- 

Você selecionou "... porque me dou ao luxo "

O quanto isso é importante para você?

- Extremamente importante
  - Muito importante
  - Moderadamente importante
  - Levemente importante
  - Nada importante
- 

Você selecionou "... porque é natural (exemplo, não geneticamente modificado) "

O quanto isso é importante para você?

- Extremamente importante
  - Muito importante
  - Moderadamente importante
  - Levemente importante
  - Nada importante
- 

Você selecionou "... porque eu não quero gastar muito dinheiro "

O quanto isso é importante para você?

- Extremamente importante
- Muito importante
- Moderadamente importante
- Levemente importante
- Nada importante



Você selecionou "... porque tem baixas calorias "

O quanto isso é importante para você?

- Extremamente importante
  - Muito importante
  - Moderadamente importante
  - Levemente importante
  - Nada importante
- 

Você selecionou "... porque estou frustrado "

O quanto isso é importante para você?

- Extremamente importante
  - Muito importante
  - Moderadamente importante
  - Levemente importante
  - Nada importante
- 

Você selecionou "... porque me faz parecer melhor na frente dos outros "

O quanto isso é importante para você?

- Extremamente importante
  - Muito importante
  - Moderadamente importante
  - Levemente importante
  - Nada importante
- 

Você selecionou "... porque seria falta de educação não comer isso "

O quanto isso é importante para você?

- Extremamente importante

- Muito importante
  - Moderadamente importante
  - Levemente importante
  - Nada importante
- 

Você selecionou "... porque a apresentação é atraente, por exemplo a embalagem "

O quanto isso é importante para você?

- Extremamente importante
  - Muito importante
  - Moderadamente importante
  - Levemente importante
  - Nada importante
- 

Você selecionou "... porque eu posso desfrutar o momento com outras pessoas "

O quanto isso é importante para você?

- Extremamente importante
  - Muito importante
  - Moderadamente importante
  - Levemente importante
  - Nada importante
- 

Você selecionou "... porque é orgânico "

O quanto isso é importante para você?

- Extremamente importante
- Muito importante
- Moderadamente importante
- Levemente importante
- Nada importante

---

Você selecionou "... porque eu cresci comendo isso "

O quanto isso é importante para você?

- Extremamente importante
  - Muito importante
  - Moderadamente importante
  - Levemente importante
  - Nada importante
- 

Você selecionou "... porque eu curto "

O quanto isso é importante para você?

- Extremamente importante
  - Muito importante
  - Moderadamente importante
  - Levemente importante
  - Nada importante
- 

Você selecionou "... porque estou faminto "

O quanto isso é importante para você?

- Extremamente importante
  - Muito importante
  - Moderadamente importante
  - Levemente importante
  - Nada importante
- 

Você selecionou "... porque normalmente eu como isso "

O quanto isso é importante para você?

- Extremamente importante
  - Muito importante
  - Moderadamente importante
  - Levemente importante
  - Nada importante
- 

Você selecionou "... porque eu tenho vontade de comer isso "

O quanto isso é importante para você?

- Extremamente importante
  - Muito importante
  - Moderadamente importante
  - Levemente importante
  - Nada importante
- 

Você selecionou "... porque é fácil de preparar "

O quanto isso é importante para você?

- Extremamente importante
  - Muito importante
  - Moderadamente importante
  - Levemente importante
  - Nada importante
- 

Você selecionou "... porque eu estou triste "

O quanto isso é importante para você?

- Extremamente importante
- Muito importante
- Moderadamente importante
- Levemente importante
- Nada importante

---

Você selecionou "... porque tem pouca gordura "

O quanto isso é importante para você?

- Extremamente importante
- Muito importante
- Moderadamente importante
- Levemente importante
- Nada importante

---

Você selecionou "... porque eu vejo propaganda em algum lugar ou vejo na TV "

O quanto isso é importante para você?

- Extremamente importante
- Muito importante
- Moderadamente importante
- Levemente importante
- Nada importante

---

Você selecionou "... porque deixa as reuniões sociais mais agradáveis "

O quanto isso é importante para você?

- Extremamente importante
- Muito importante
- Moderadamente importante
- Levemente importante
- Nada importante

---

Você selecionou "... porque eu devo comer "

O quanto isso é importante para você?

- Extremamente importante
  - Muito importante
  - Moderadamente importante
  - Levemente importante
  - Nada importante
- 

Você selecionou "... porque os outros gostam "

O quanto isso é importante para você?

- Extremamente importante
  - Muito importante
  - Moderadamente importante
  - Levemente importante
  - Nada importante
- 

Você selecionou "... porque eu me sinto sozinho "

O quanto isso é importante para você?

- Extremamente importante
  - Muito importante
  - Moderadamente importante
  - Levemente importante
  - Nada importante
- 

Você selecionou "... porque eu controlo meu peso "

O quanto isso é importante para você?

- Extremamente importante
- Muito importante
- Moderadamente importante
- Levemente importante
- Nada importante

---

Você selecionou "... porque não contém substâncias perigosas como agrotóxicos, poluentes, antibióticos "

O quanto isso é importante para você?

- Extremamente importante
- Muito importante
- Moderadamente importante
- Levemente importante
- Nada importante

---

Você selecionou "... porque é mais conveniente "

O quanto isso é importante para você?

- Extremamente importante
- Muito importante
- Moderadamente importante
- Levemente importante
- Nada importante

---

Você selecionou "... porque eu preciso de energia "

O quanto isso é importante para você?

- Extremamente importante
- Muito importante
- Moderadamente importante
- Levemente importante
- Nada importante

---

Você selecionou "... porque me é familiar "

O quanto isso é importante para você?

- Extremamente importante
  - Muito importante
  - Moderadamente importante
  - Levemente importante
  - Nada importante
- 

Você selecionou "... porque eu gosto "

O quanto isso é importante para você?

- Extremamente importante
  - Muito importante
  - Moderadamente importante
  - Levemente importante
  - Nada importante
- 

Você selecionou "... porque me sacia de forma agradável "

O quanto isso é importante para você?

- Extremamente importante
  - Muito importante
  - Moderadamente importante
  - Levemente importante
  - Nada importante
- 

Você selecionou "... para compensar "

O quanto isso é importante para você?

- Extremamente importante
- Muito importante
- Moderadamente importante
- Levemente importante
- Nada importante



---

Você selecionou "... porque não faz parte das tradições como Natal, Ano Novo e ocasiões especiais "

O quanto isso é importante para você?

- Extremamente importante
- Muito importante
- Moderadamente importante
- Levemente importante
- Nada importante

---

Você selecionou "... porque faz parte de certas situações "

O quanto isso é importante para você?

- Extremamente importante
- Muito importante
- Moderadamente importante
- Levemente importante
- Nada importante

---

Você selecionou "... para manter uma dieta balanceada "

O quanto isso é importante para você?

- Extremamente importante
- Muito importante
- Moderadamente importante
- Levemente importante
- Nada importante

---

Você selecionou "... porque é sociável "

O quanto isso é importante para você?

- Extremamente importante
  - Muito importante
  - Moderadamente importante
  - Levemente importante
  - Nada importante
- 

Você selecionou "... porque não é caro "

O quanto isso é importante para você?

- Extremamente importante
  - Muito importante
  - Moderadamente importante
  - Levemente importante
  - Nada importante
- 

Você selecionou "... porque me atrai aparentemente, por exemplo cores atraentes "

O quanto isso é importante para você?

- Extremamente importante
  - Muito importante
  - Moderadamente importante
  - Levemente importante
  - Nada importante
- 

Você selecionou "... para não desapontar alguém que está tentando me agradar "

O quanto isso é importante para você?

- Extremamente importante
- Muito importante
- Moderadamente importante
- Levemente importante

Nada importante

---

Você selecionou "... porque é moda "  
O quanto isso é importante para você?

- Extremamente importante
  - Muito importante
  - Moderadamente importante
  - Levemente importante
  - Nada importante
- 

Você selecionou "... porque está em promoção "  
O quanto isso é importante para você?

- Extremamente importante
  - Muito importante
  - Moderadamente importante
  - Levemente importante
  - Nada importante
- 

Você selecionou "... porque me mantém em forma exemplo, vigoroso, dinâmico "  
O quanto isso é importante para você?

- Extremamente importante
  - Muito importante
  - Moderadamente importante
  - Levemente importante
  - Nada importante
- 

Você selecionou "... porque é a única escolha "  
O quanto isso é importante para você?

- Extremamente importante
  - Muito importante
  - Moderadamente importante
  - Levemente importante
  - Nada importante
- 

Você selecionou "... porque eu quero comer todos os dias "

O quanto isso é importante para você?

- Extremamente importante
  - Muito importante
  - Moderadamente importante
  - Levemente importante
  - Nada importante
- 

**Quais as razões pelas quais você não come arroz? (Marque todas as respostas que correspondem)**

- ... O preço está muito alto
- ... Não é um alimento que eu como perto de outras pessoas
- .. Não é nada que eu queira comer agora
- ... Eu não gosto do jeito que parece
- .. Eu comi recentemente e não quero comer a mesma comida com tanta frequência
- ... Não é apropriado para a situação
- ... Eu não quero me dar ao luxo
- ... Muito rico em calorias
- ... Eu nunca escolheria isso e eu gosto de comer a mesma comida todos os dias
- ... Essa comida me faz sentir triste, solitário e frustrado
- ... Eu normalmente não como isso
- ... Comer isso me faz parecer antiquado
- ... Não é conveniente

- ... Eu não devo comer isso
  - ... Eu não gosto disso
  - ... Eu não acho que seja um lanche
  - ... O tamanho da porção não é adequado
  - ... Não é saudável
  - ... Não é orgânico
  - ... Não sustenta o suficiente
- 

Você selecionou "... Eu não acho que seja um lanche"

O quanto isso é importante para você?

- Extremamente importante
  - Muito importante
  - Moderadamente importante
  - Levemente importante
  - Nada importante
- 

Você selecionou "... Eu não gosto disso"

O quanto isso é importante para você?

- Extremamente importante
  - Muito importante
  - Moderadamente importante
  - Levemente importante
  - Nada importante
- 

Você selecionou "... Eu normalmente não como isso"

O quanto isso é importante para você?

- Extremamente importante
- Muito importante
- Moderadamente importante

- Levemente importante
  - Nada importante
- 

Você selecionou "... O tamanho da porção não é adequado"

O quanto isso é importante para você?

- Extremamente importante
  - Muito importante
  - Moderadamente importante
  - Levemente importante
  - Nada importante
- 

Você selecionou "... Não sustenta o suficiente"

O quanto isso é importante para você?

- Extremamente importante
  - Muito importante
  - Moderadamente importante
  - Levemente importante
  - Nada importante
- 

Você selecionou "... Não é saudável"

O quanto isso é importante para você?

- Extremamente importante
  - Muito importante
  - Moderadamente importante
  - Levemente importante
  - Nada importante
- 

Você selecionou "... Não é conveniente"

O quanto isso é importante para você?

- Extremamente importante
  - Muito importante
  - Moderadamente importante
  - Levemente importante
  - Nada importante
- 

Você selecionou "... Eu não quero me dar ao luxo"

O quanto isso é importante para você?

- Extremamente importante
  - Muito importante
  - Moderadamente importante
  - Levemente importante
  - Nada importante
- 

Você selecionou "... Não é apropriado para a situação"

O quanto isso é importante para você?

- Extremamente importante
  - Muito importante
  - Moderadamente importante
  - Levemente importante
  - Nada importante
- 

Você selecionou "... Não é um alimento que eu como perto de outras pessoas"

O quanto isso é importante para você?

- Extremamente importante
- Muito importante
- Moderadamente importante

- Levemente importante
  - Nada importante
- 

Você selecionou "... O preço está muito alto"

O quanto isso é importante para você?

- Extremamente importante
  - Muito importante
  - Moderadamente importante
  - Levemente importante
  - Nada importante
- 

Você selecionou "... Eu não gosto do jeito que parece"

O quanto isso é importante para você?

- Extremamente importante
  - Muito importante
  - Moderadamente importante
  - Levemente importante
  - Nada importante
- 

Você selecionou "... Muito rico em calorias"

O quanto isso é importante para você?

- Extremamente importante
  - Muito importante
  - Moderadamente importante
  - Levemente importante
  - Nada importante
- 

Você selecionou "... Eu não devo comer isso"



O quanto isso é importante para você?

- Extremamente importante
  - Muito importante
  - Moderadamente importante
  - Levemente importante
  - Nada importante
- 

Você selecionou "... Comer isso me faz parecer antiquado"

O quanto isso é importante para você?

- Extremamente importante
  - Muito importante
  - Moderadamente importante
  - Levemente importante
  - Nada importante
- 

Você selecionou ".. Não é nada que eu queira comer agora"

O quanto isso é importante para você?

- Extremamente importante
  - Muito importante
  - Moderadamente importante
  - Levemente importante
  - Nada importante
- 

Você selecionou ".. Eu comi recentemente e não quero comer a mesma comida com tanta frequência"

O quanto isso é importante para você?

- Extremamente importante
- Muito importante

- Moderadamente importante
  - Levemente importante
  - Nada importante
- 

Você selecionou "... Eu nunca escolheria isso e eu gosto de comer a mesma comida todos os dias"

O quanto isso é importante para você?

- Extremamente importante
  - Muito importante
  - Moderadamente importante
  - Levemente importante
  - Nada importante
- 

Você selecionou "... Essa comida me faz sentir triste, solitário e frustrado"

O quanto isso é importante para você?

- Extremamente importante
  - Muito importante
  - Moderadamente importante
  - Levemente importante
  - Nada importante
- 

Você selecionou "... Não é orgânico"

O quanto isso é importante para você?

- Extremamente importante
- Muito importante
- Moderadamente importante
- Levemente importante
- Nada importante

## Reasons for Protein foods Choices(RATA)

---

Você consome feijão?

- Sim
- Não
- 

**Quais as razões pelas quais você come feijão? (Marque todas as respostas que correspondem)**

- ... porque é sociável
- ... porque me sacia de forma agradável
- ... porque eu gosto
- ... porque estou habituado
- ... porque é a única escolha
- ... porque é orgânico
- ... porque me dou ao luxo
- ... porque me atrai aparentemente, por exemplo cores atraentes
- ... porque eu controlo meu peso
- ... porque é mais conveniente
- ... porque está em promoção
- ... porque deixa as reuniões sociais mais agradáveis
- ... porque é saboroso
- ... porque é natural (exemplo, não geneticamente modificado)
- ... porque eu preciso de energia
- ... porque seria falta de educação não comer isso
- ... porque é saudável
- ... porque estou frustrado
- ... porque eu devo comer
- ... porque eu vejo propaganda em algum lugar ou vejo na TV
- ... porque não faz parte das tradições como Natal, Ano Novo e ocasiões especiais

- ... porque eu me sinto sozinho
- ... porque a apresentação é atraente, por exemplo a embalagem
- ... porque estou faminto
- ... porque me é familiar
- ... porque eu estou triste
- ... porque tem baixas calorias
- ... porque me faz parecer melhor na frente dos outros
- ... para não desapontar alguém que está tentando me agradar
- ... porque normalmente eu como isso
- ... porque é fácil de preparar
- ... porque eu posso desfrutar o momento com outras pessoas
- ... para compensar
- ... porque eu não quero gastar muito dinheiro
- ... porque não contém substâncias perigosas como agrotóxicos, poluentes, antibióticos
- ... porque é moda
- ... porque faz parte de certas situações
- ... porque é rápido de preparar
- ... porque eu tenho vontade de comer isso
- ... para manter uma dieta balanceada
- ... porque eu quero comer todos os dias
- ... porque tem pouca gordura
- ... porque eu curto
- ... porque os outros gostam
- ... porque não é caro
- ... porque eu cresci comendo isso
- ... porque me mantém em forma exemplo, vigoroso, dinâmico

---

Você selecionou "... porque estou habituado "

O quanto isso é importante para você?

- Extremamente importante

- Muito importante
  - Moderadamente importante
  - Levemente importante
  - Nada importante
- 

Você selecionou "... porque é saudável "

O quanto isso é importante para você?

- Extremamente importante
  - Muito importante
  - Moderadamente importante
  - Levemente importante
  - Nada importante
- 

Você selecionou "... porque é rápido de preparar "

O quanto isso é importante para você?

- Extremamente importante
  - Muito importante
  - Moderadamente importante
  - Levemente importante
  - Nada importante
- 

Você selecionou "... porque é saboroso "

O quanto isso é importante para você?

- Extremamente importante
- Muito importante
- Moderadamente importante
- Levemente importante
- Nada importante

Você selecionou "... porque me dou ao luxo "

O quanto isso é importante para você?

- Extremamente importante
  - Muito importante
  - Moderadamente importante
  - Levemente importante
  - Nada importante
- 

Você selecionou "... porque é natural (exemplo, não geneticamente modificado) "

O quanto isso é importante para você?

- Extremamente importante
  - Muito importante
  - Moderadamente importante
  - Levemente importante
  - Nada importante
- 

Você selecionou "... porque eu não quero gastar muito dinheiro "

O quanto isso é importante para você?

- Extremamente importante
  - Muito importante
  - Moderadamente importante
  - Levemente importante
  - Nada importante
- 

Você selecionou "... porque tem baixas calorias "

O quanto isso é importante para você?

- Extremamente importante

- Muito importante
  - Moderadamente importante
  - Levemente importante
  - Nada importante
- 

Você selecionou "... porque estou frustrado "

O quanto isso é importante para você?

- Extremamente importante
  - Muito importante
  - Moderadamente importante
  - Levemente importante
  - Nada importante
- 

Você selecionou "... porque me faz parecer melhor na frente dos outros "

O quanto isso é importante para você?

- Extremamente importante
  - Muito importante
  - Moderadamente importante
  - Levemente importante
  - Nada importante
- 

Você selecionou "... porque seria falta de educação não comer isso "

O quanto isso é importante para você?

- Extremamente importante
- Muito importante
- Moderadamente importante
- Levemente importante
- Nada importante

Você selecionou "... porque a apresentação é atraente, por exemplo a embalagem "

O quanto isso é importante para você?

- Extremamente importante
- Muito importante
- Moderadamente importante
- Levemente importante
- Nada importante

Você selecionou "... porque eu posso desfrutar o momento com outras pessoas "

O quanto isso é importante para você?

- Extremamente importante
- Muito importante
- Moderadamente importante
- Levemente importante
- Nada importante

Você selecionou "... porque é orgânico "

O quanto isso é importante para você?

- Extremamente importante
- Muito importante
- Moderadamente importante
- Levemente importante
- Nada importante

Você selecionou "... porque eu cresci comendo isso "

O quanto isso é importante para você?

- Extremamente importante



- Muito importante
  - Moderadamente importante
  - Levemente importante
  - Nada importante
- 

Você selecionou "... porque eu curto "

O quanto isso é importante para você?

- Extremamente importante
  - Muito importante
  - Moderadamente importante
  - Levemente importante
  - Nada importante
- 

Você selecionou "... porque estou faminto "

O quanto isso é importante para você?

- Extremamente importante
  - Muito importante
  - Moderadamente importante
  - Levemente importante
  - Nada importante
- 

Você selecionou "... porque normalmente eu como isso "

O quanto isso é importante para você?

- Extremamente importante
- Muito importante
- Moderadamente importante
- Levemente importante
- Nada importante

---

Você selecionou "... porque eu tenho vontade de comer isso "

O quanto isso é importante para você?

- Extremamente importante
  - Muito importante
  - Moderadamente importante
  - Levemente importante
  - Nada importante
- 

Você selecionou "... porque é fácil de preparar "

O quanto isso é importante para você?

- Extremamente importante
  - Muito importante
  - Moderadamente importante
  - Levemente importante
  - Nada importante
- 

Você selecionou "... porque eu estou triste "

O quanto isso é importante para você?

- Extremamente importante
  - Muito importante
  - Moderadamente importante
  - Levemente importante
  - Nada importante
- 

Você selecionou "... porque tem pouca gordura "

O quanto isso é importante para você?

- Extremamente importante

- Muito importante
  - Moderadamente importante
  - Levemente importante
  - Nada importante
- 

Você selecionou "... porque eu vejo propaganda em algum lugar ou vejo na TV "

O quanto isso é importante para você?

- Extremamente importante
  - Muito importante
  - Moderadamente importante
  - Levemente importante
  - Nada importante
- 

Você selecionou "... porque deixa as reuniões sociais mais agradáveis "

O quanto isso é importante para você?

- Extremamente importante
  - Muito importante
  - Moderadamente importante
  - Levemente importante
  - Nada importante
- 

Você selecionou "... porque eu devo comer "

O quanto isso é importante para você?

- Extremamente importante
- Muito importante
- Moderadamente importante
- Levemente importante
- Nada importante

---

Você selecionou "... porque os outros gostam "

O quanto isso é importante para você?

- Extremamente importante
  - Muito importante
  - Moderadamente importante
  - Levemente importante
  - Nada importante
- 

Você selecionou "... porque eu me sinto sozinho "

O quanto isso é importante para você?

- Extremamente importante
  - Muito importante
  - Moderadamente importante
  - Levemente importante
  - Nada importante
- 

Você selecionou "... porque eu controlo meu peso "

O quanto isso é importante para você?

- Extremamente importante
  - Muito importante
  - Moderadamente importante
  - Levemente importante
  - Nada importante
- 

Você selecionou "... porque não contém substâncias perigosas como agrotóxicos, poluentes, antibióticos "

O quanto isso é importante para você?

- Extremamente importante

- Muito importante
  - Moderadamente importante
  - Levemente importante
  - Nada importante
- 

Você selecionou "... porque é mais conveniente "

O quanto isso é importante para você?

- Extremamente importante
  - Muito importante
  - Moderadamente importante
  - Levemente importante
  - Nada importante
- 

Você selecionou "... porque eu preciso de energia "

O quanto isso é importante para você?

- Extremamente importante
  - Muito importante
  - Moderadamente importante
  - Levemente importante
  - Nada importante
- 

Você selecionou "... porque me é familiar "

O quanto isso é importante para você?

- Extremamente importante
- Muito importante
- Moderadamente importante
- Levemente importante
- Nada importante

Você selecionou "... porque eu gosto "

O quanto isso é importante para você?

- Extremamente importante
  - Muito importante
  - Moderadamente importante
  - Levemente importante
  - Nada importante
- 

Você selecionou "... porque me sacia de forma agradável "

O quanto isso é importante para você?

- Extremamente importante
  - Muito importante
  - Moderadamente importante
  - Levemente importante
  - Nada importante
- 

Você selecionou "... para compensar "

O quanto isso é importante para você?

- Extremamente importante
  - Muito importante
  - Moderadamente importante
  - Levemente importante
  - Nada importante
- 

Você selecionou "... porque não faz parte das tradições como Natal, Ano Novo e ocasiões especiais "

O quanto isso é importante para você?

- Extremamente importante

- Muito importante
  - Moderadamente importante
  - Levemente importante
  - Nada importante
- 

Você selecionou "... porque faz parte de certas situações "

O quanto isso é importante para você?

- Extremamente importante
  - Muito importante
  - Moderadamente importante
  - Levemente importante
  - Nada importante
- 

Você selecionou "... para manter uma dieta balanceada "

O quanto isso é importante para você?

- Extremamente importante
  - Muito importante
  - Moderadamente importante
  - Levemente importante
  - Nada importante
- 

Você selecionou "... porque é sociável "

O quanto isso é importante para você?

- Extremamente importante
- Muito importante
- Moderadamente importante
- Levemente importante
- Nada importante

---

Você selecionou "... porque não é caro "

O quanto isso é importante para você?

- Extremamente importante
  - Muito importante
  - Moderadamente importante
  - Levemente importante
  - Nada importante
- 

Você selecionou "... porque me atrai aparentemente, por exemplo cores atraentes "

O quanto isso é importante para você?

- Extremamente importante
  - Muito importante
  - Moderadamente importante
  - Levemente importante
  - Nada importante
- 

Você selecionou "... para não desapontar alguém que está tentando me agradar "

O quanto isso é importante para você?

- Extremamente importante
  - Muito importante
  - Moderadamente importante
  - Levemente importante
  - Nada importante
- 

Você selecionou "... porque é moda "

O quanto isso é importante para você?

- Extremamente importante



- Muito importante
  - Moderadamente importante
  - Levemente importante
  - Nada importante
- 

Você selecionou "... porque está em promoção "

O quanto isso é importante para você?

- Extremamente importante
  - Muito importante
  - Moderadamente importante
  - Levemente importante
  - Nada importante
- 

Você selecionou "... porque me mantém em forma exemplo, vigoroso, dinâmico "

O quanto isso é importante para você?

- Extremamente importante
  - Muito importante
  - Moderadamente importante
  - Levemente importante
  - Nada importante
- 

Você selecionou "... porque é a única escolha "

O quanto isso é importante para você?

- Extremamente importante
- Muito importante
- Moderadamente importante
- Levemente importante
- Nada importante

Você selecionou "... porque eu quero comer todos os dias "

O quanto isso é importante para você?

- Extremamente importante
- Muito importante
- Moderadamente importante
- Levemente importante
- Nada importante

**Quais as razões pelas quais você não come feijão? (Marque todas as respostas que correspondem)**

- ... Eu não quero me dar ao luxo
- ... Não é orgânico
- ... Não é um alimento que eu como perto de outras pessoas
- ... Essa comida me faz sentir triste, solitário e frustrado
- ... Não é apropriado para a situação
- ... Não é saudável
- ... Eu normalmente não como isso
- ... Eu nunca escolheria isso e eu gosto de comer a mesma comida todos os dias
- .. Eu comi recentemente e não quero comer a mesma comida com tanta frequência
- ... Não sustenta o suficiente
- ... Eu não devo comer isso
- ... Eu não gosto do jeito que parece
- ... Eu não acho que seja um lanche
- ... O tamanho da porção não é adequado
- ... Comer isso me faz parecer antiquado
- ... Muito rico em calorias
- .. Não é nada que eu queira comer agora
- ... O preço está muito alto
- ... Eu não gosto disso

... Não é conveniente

---

Você selecionou "... Eu não acho que seja um lanche"

O quanto isso é importante para você?

- Extremamente importante
  - Muito importante
  - Moderadamente importante
  - Levemente importante
  - Nada importante
- 

Você selecionou "... Eu não gosto disso"

O quanto isso é importante para você?

- Extremamente importante
  - Muito importante
  - Moderadamente importante
  - Levemente importante
  - Nada importante
- 

Você selecionou "... Eu normalmente não como isso"

O quanto isso é importante para você?

- Extremamente importante
  - Muito importante
  - Moderadamente importante
  - Levemente importante
  - Nada importante
- 

Você selecionou "... O tamanho da porção não é adequado"

O quanto isso é importante para você?

- Extremamente importante
  - Muito importante
  - Moderadamente importante
  - Levemente importante
  - Nada importante
- 

Você selecionou "... Não sustenta o suficiente"

O quanto isso é importante para você?

- Extremamente importante
  - Muito importante
  - Moderadamente importante
  - Levemente importante
  - Nada importante
- 

Você selecionou "... Não é saudável"

O quanto isso é importante para você?

- Extremamente importante
  - Muito importante
  - Moderadamente importante
  - Levemente importante
  - Nada importante
- 

Você selecionou "... Não é conveniente"

O quanto isso é importante para você?

- Extremamente importante
- Muito importante
- Moderadamente importante
- Levemente importante

Nada importante

---

Você selecionou "... Eu não quero me dar ao luxo"

O quanto isso é importante para você?

- Extremamente importante
  - Muito importante
  - Moderadamente importante
  - Levemente importante
  - Nada importante
- 

Você selecionou "... Não é apropriado para a situação"

O quanto isso é importante para você?

- Extremamente importante
  - Muito importante
  - Moderadamente importante
  - Levemente importante
  - Nada importante
- 

Você selecionou "... Não é um alimento que eu como perto de outras pessoas"

O quanto isso é importante para você?

- Extremamente importante
  - Muito importante
  - Moderadamente importante
  - Levemente importante
  - Nada importante
- 

Você selecionou "... O preço está muito alto"

O quanto isso é importante para você?

- Extremamente importante
  - Muito importante
  - Moderadamente importante
  - Levemente importante
  - Nada importante
- 

Você selecionou "... Eu não gosto do jeito que parece"

O quanto isso é importante para você?

- Extremamente importante
  - Muito importante
  - Moderadamente importante
  - Levemente importante
  - Nada importante
- 

Você selecionou "... Muito rico em calorias"

O quanto isso é importante para você?

- Extremamente importante
  - Muito importante
  - Moderadamente importante
  - Levemente importante
  - Nada importante
- 

Você selecionou "... Eu não devo comer isso"

O quanto isso é importante para você?

- Extremamente importante
- Muito importante
- Moderadamente importante
- Levemente importante

Nada importante

---

Você selecionou "... Comer isso me faz parecer antiquado"

O quanto isso é importante para você?

- Extremamente importante
  - Muito importante
  - Moderadamente importante
  - Levemente importante
  - Nada importante
- 

Você selecionou ".. Não é nada que eu queira comer agora"

O quanto isso é importante para você?

- Extremamente importante
  - Muito importante
  - Moderadamente importante
  - Levemente importante
  - Nada importante
- 

Você selecionou ".. Eu comi recentemente e não quero comer a mesma comida com tanta frequência"

O quanto isso é importante para você?

- Extremamente importante
  - Muito importante
  - Moderadamente importante
  - Levemente importante
  - Nada importante
-

Você selecionou "... Eu nunca escolheria isso e eu gosto de comer a mesma comida todos os dias"

O quanto isso é importante para você?

- Extremamente importante
  - Muito importante
  - Moderadamente importante
  - Levemente importante
  - Nada importante
- 

Você selecionou "... Essa comida me faz sentir triste, solitário e frustrado"

O quanto isso é importante para você?

- Extremamente importante
  - Muito importante
  - Moderadamente importante
  - Levemente importante
  - Nada importante
- 

Você selecionou "... Não é orgânico"

O quanto isso é importante para você?

- Extremamente importante
  - Muito importante
  - Moderadamente importante
  - Levemente importante
  - Nada importante
- 

## Reasons for Dairy Food Choices(RATA)

---

Você consome leite?



- Sim
- Não
- 

**Quais as razões pelas quais você come leite? (Marque todas as respostas que correspondem)**

- ... porque normalmente eu como isso
- ... porque deixa as reuniões sociais mais agradáveis
- ... porque é saboroso
- ... porque tem pouca gordura
- ... porque a apresentação é atraente, por exemplo a embalagem
- ... para não desapontar alguém que está tentando me agradar
- ... porque me dou ao luxo
- ... para compensar
- ... porque estou habituado
- ... porque faz parte de certas situações
- ... porque está em promoção
- ... porque eu tenho vontade de comer isso
- ... porque não é caro
- ... porque eu controlo meu peso
- ... porque os outros gostam
- ... porque é sociável
- ... porque eu curto
- ... porque me mantém em forma exemplo, vigoroso, dinâmico
- ... porque eu me sinto sozinho
- ... porque é saudável
- ... para manter uma dieta balanceada
- ... porque eu posso desfrutar o momento com outras pessoas
- ... porque é mais conveniente
- ... porque eu quero comer todos os dias
- ... porque me atrai aparentemente, por exemplo cores atraentes

- ... porque eu preciso de energia
- ... porque eu cresci comendo isso
- ... porque não faz parte das tradições como Natal, Ano Novo e ocasiões especiais
- ... porque eu gosto
- ... porque eu estou triste
- ... porque é rápido de preparar
- ... porque eu vejo propaganda em algum lugar ou vejo na TV
- ... porque me é familiar
- ... porque é fácil de preparar
- ... porque é natural (exemplo, não geneticamente modificado)
- ... porque é orgânico
- ... porque não contém substâncias perigosas como agrotóxicos, poluentes, antibióticos
- ... porque eu devo comer
- ... porque eu não quero gastar muito dinheiro
- ... porque me sacia de forma agradável
- ... porque estou frustrado
- ... porque seria falta de educação não comer isso
- ... porque tem baixas calorias
- ... porque é a única escolha
- ... porque me faz parecer melhor na frente dos outros
- ... porque é moda
- ... porque estou faminto

---

Você selecionou "... porque estou habituado "

O quanto isso é importante para você?

- Extremamente importante
- Muito importante
- Moderadamente importante
- Levemente importante
- Nada importante

---

Você selecionou "... porque é saudável "

O quanto isso é importante para você?

- Extremamente importante
  - Muito importante
  - Moderadamente importante
  - Levemente importante
  - Nada importante
- 

Você selecionou "... porque é rápido de preparar "

O quanto isso é importante para você?

- Extremamente importante
  - Muito importante
  - Moderadamente importante
  - Levemente importante
  - Nada importante
- 

Você selecionou "... porque é saboroso "

O quanto isso é importante para você?

- Extremamente importante
  - Muito importante
  - Moderadamente importante
  - Levemente importante
  - Nada importante
- 

Você selecionou "... porque me dou ao luxo "

O quanto isso é importante para você?

- Extremamente importante

- Muito importante
  - Moderadamente importante
  - Levemente importante
  - Nada importante
- 

Você selecionou "... porque é natural (exemplo, não geneticamente modificado) "

O quanto isso é importante para você?

- Extremamente importante
  - Muito importante
  - Moderadamente importante
  - Levemente importante
  - Nada importante
- 

Você selecionou "... porque eu não quero gastar muito dinheiro "

O quanto isso é importante para você?

- Extremamente importante
  - Muito importante
  - Moderadamente importante
  - Levemente importante
  - Nada importante
- 

Você selecionou "... porque tem baixas calorias "

O quanto isso é importante para você?

- Extremamente importante
- Muito importante
- Moderadamente importante
- Levemente importante
- Nada importante

---

Você selecionou "... porque estou frustrado "

O quanto isso é importante para você?

- Extremamente importante
  - Muito importante
  - Moderadamente importante
  - Levemente importante
  - Nada importante
- 

Você selecionou "... porque me faz parecer melhor na frente dos outros "

O quanto isso é importante para você?

- Extremamente importante
  - Muito importante
  - Moderadamente importante
  - Levemente importante
  - Nada importante
- 

Você selecionou "... porque seria falta de educação não comer isso "

O quanto isso é importante para você?

- Extremamente importante
  - Muito importante
  - Moderadamente importante
  - Levemente importante
  - Nada importante
- 

Você selecionou "... porque a apresentação é atraente, por exemplo a embalagem "

O quanto isso é importante para você?

- Extremamente importante

- Muito importante
  - Moderadamente importante
  - Levemente importante
  - Nada importante
- 

Você selecionou "... porque eu posso desfrutar o momento com outras pessoas "

O quanto isso é importante para você?

- Extremamente importante
  - Muito importante
  - Moderadamente importante
  - Levemente importante
  - Nada importante
- 

Você selecionou "... porque é orgânico "

O quanto isso é importante para você?

- Extremamente importante
  - Muito importante
  - Moderadamente importante
  - Levemente importante
  - Nada importante
- 

Você selecionou "... porque eu cresci comendo isso "

O quanto isso é importante para você?

- Extremamente importante
- Muito importante
- Moderadamente importante
- Levemente importante
- Nada importante

---

Você selecionou "... porque eu curto "

O quanto isso é importante para você?

- Extremamente importante
  - Muito importante
  - Moderadamente importante
  - Levemente importante
  - Nada importante
- 

Você selecionou "... porque estou faminto "

O quanto isso é importante para você?

- Extremamente importante
  - Muito importante
  - Moderadamente importante
  - Levemente importante
  - Nada importante
- 

Você selecionou "... porque normalmente eu como isso "

O quanto isso é importante para você?

- Extremamente importante
  - Muito importante
  - Moderadamente importante
  - Levemente importante
  - Nada importante
- 

Você selecionou "... porque eu tenho vontade de comer isso "

O quanto isso é importante para você?

- Extremamente importante

- Muito importante
  - Moderadamente importante
  - Levemente importante
  - Nada importante
- 

Você selecionou "... porque é fácil de preparar "

O quanto isso é importante para você?

- Extremamente importante
  - Muito importante
  - Moderadamente importante
  - Levemente importante
  - Nada importante
- 

Você selecionou "... porque eu estou triste "

O quanto isso é importante para você?

- Extremamente importante
  - Muito importante
  - Moderadamente importante
  - Levemente importante
  - Nada importante
- 

Você selecionou "... porque tem pouca gordura "

O quanto isso é importante para você?

- Extremamente importante
- Muito importante
- Moderadamente importante
- Levemente importante
- Nada importante



---

Você selecionou "... porque eu vejo propaganda em algum lugar ou vejo na TV "

O quanto isso é importante para você?

- Extremamente importante
  - Muito importante
  - Moderadamente importante
  - Levemente importante
  - Nada importante
- 

Você selecionou "... porque deixa as reuniões sociais mais agradáveis "

O quanto isso é importante para você?

- Extremamente importante
  - Muito importante
  - Moderadamente importante
  - Levemente importante
  - Nada importante
- 

Você selecionou "... porque eu devo comer "

O quanto isso é importante para você?

- Extremamente importante
  - Muito importante
  - Moderadamente importante
  - Levemente importante
  - Nada importante
- 

Você selecionou "... porque os outros gostam "

O quanto isso é importante para você?

- Extremamente importante

- Muito importante
  - Moderadamente importante
  - Levemente importante
  - Nada importante
- 

Você selecionou "... porque eu me sinto sozinho "

O quanto isso é importante para você?

- Extremamente importante
  - Muito importante
  - Moderadamente importante
  - Levemente importante
  - Nada importante
- 

Você selecionou "... porque eu controlo meu peso "

O quanto isso é importante para você?

- Extremamente importante
  - Muito importante
  - Moderadamente importante
  - Levemente importante
  - Nada importante
- 

Você selecionou "... porque não contém substâncias perigosas como agrotóxicos, poluentes, antibióticos "

O quanto isso é importante para você?

- Extremamente importante
- Muito importante
- Moderadamente importante
- Levemente importante
- Nada importante

---

Você selecionou "... porque é mais conveniente "

O quanto isso é importante para você?

- Extremamente importante
  - Muito importante
  - Moderadamente importante
  - Levemente importante
  - Nada importante
- 

Você selecionou "... porque eu preciso de energia "

O quanto isso é importante para você?

- Extremamente importante
  - Muito importante
  - Moderadamente importante
  - Levemente importante
  - Nada importante
- 

Você selecionou "... porque me é familiar "

O quanto isso é importante para você?

- Extremamente importante
  - Muito importante
  - Moderadamente importante
  - Levemente importante
  - Nada importante
- 

Você selecionou "... porque eu gosto "

O quanto isso é importante para você?

- Extremamente importante
  - Muito importante
  - Moderadamente importante
  - Levemente importante
  - Nada importante
- 

Você selecionou "... porque me sacia de forma agradável "

O quanto isso é importante para você?

- Extremamente importante
  - Muito importante
  - Moderadamente importante
  - Levemente importante
  - Nada importante
- 

Você selecionou "... para compensar "

O quanto isso é importante para você?

- Extremamente importante
  - Muito importante
  - Moderadamente importante
  - Levemente importante
  - Nada importante
- 

Você selecionou "... porque não faz parte das tradições como Natal, Ano Novo e ocasiões especiais "

O quanto isso é importante para você?

- Extremamente importante
- Muito importante
- Moderadamente importante
- Levemente importante

Nada importante

---

Você selecionou "... porque faz parte de certas situações "

O quanto isso é importante para você?

- Extremamente importante
  - Muito importante
  - Moderadamente importante
  - Levemente importante
  - Nada importante
- 

Você selecionou "... para manter uma dieta balanceada "

O quanto isso é importante para você?

- Extremamente importante
  - Muito importante
  - Moderadamente importante
  - Levemente importante
  - Nada importante
- 

Você selecionou "... porque é sociável "

O quanto isso é importante para você?

- Extremamente importante
  - Muito importante
  - Moderadamente importante
  - Levemente importante
  - Nada importante
- 

Você selecionou "... porque não é caro "

O quanto isso é importante para você?

- Extremamente importante
  - Muito importante
  - Moderadamente importante
  - Levemente importante
  - Nada importante
- 

Você selecionou "... porque me atrai aparentemente, por exemplo cores atraentes "

O quanto isso é importante para você?

- Extremamente importante
  - Muito importante
  - Moderadamente importante
  - Levemente importante
  - Nada importante
- 

Você selecionou "... para não desapontar alguém que está tentando me agradar "

O quanto isso é importante para você?

- Extremamente importante
  - Muito importante
  - Moderadamente importante
  - Levemente importante
  - Nada importante
- 

Você selecionou "... porque é moda "

O quanto isso é importante para você?

- Extremamente importante
- Muito importante
- Moderadamente importante

- Levemente importante
  - Nada importante
- 

Você selecionou "... porque está em promoção "

O quanto isso é importante para você?

- Extremamente importante
  - Muito importante
  - Moderadamente importante
  - Levemente importante
  - Nada importante
- 

Você selecionou "... porque me mantém em forma exemplo, vigoroso, dinâmico "

O quanto isso é importante para você?

- Extremamente importante
  - Muito importante
  - Moderadamente importante
  - Levemente importante
  - Nada importante
- 

Você selecionou "... porque é a única escolha "

O quanto isso é importante para você?

- Extremamente importante
  - Muito importante
  - Moderadamente importante
  - Levemente importante
  - Nada importante
- 

Você selecionou "... porque eu quero comer todos os dias "

O quanto isso é importante para você?

- Extremamente importante
  - Muito importante
  - Moderadamente importante
  - Levemente importante
  - Nada importante
- 

**Quais as razões pelas quais você não come leite? (Marque todas as respostas que correspondem)**

- ... Não é conveniente
  - ... Eu normalmente não como isso
  - ... Eu nunca escolheria isso e eu gosto de comer a mesma comida todos os dias
  - ... Essa comida me faz sentir triste, solitário e frustrado
  - ... Não é saudável
  - ... Eu não quero me dar ao luxo
  - ... Eu não gosto disso
  - ... O preço está muito alto
  - ... Eu não gosto do jeito que parece
  - .. Eu comi recentemente e não quero comer a mesma comida com tanta frequência
  - .. Não é nada que eu queira comer agora
  - ... Comer isso me faz parecer antiquado
  - ... Não é orgânico
  - ... Eu não acho que seja um lanche
  - ... Eu não devo comer isso
  - ... Não é apropriado para a situação
  - ... O tamanho da porção não é adequado
  - ... Muito rico em calorias
  - ... Não sustenta o suficiente
  - ... Não é um alimento que eu como perto de outras pessoas
-



Você selecionou "... Eu não acho que seja um lanche"

O quanto isso é importante para você?

- Extremamente importante
  - Muito importante
  - Moderadamente importante
  - Levemente importante
  - Nada importante
- 

Você selecionou "... Eu não gosto disso"

O quanto isso é importante para você?

- Extremamente importante
  - Muito importante
  - Moderadamente importante
  - Levemente importante
  - Nada importante
- 

Você selecionou "... Eu normalmente não como isso"

O quanto isso é importante para você?

- Extremamente importante
  - Muito importante
  - Moderadamente importante
  - Levemente importante
  - Nada importante
- 

Você selecionou "... O tamanho da porção não é adequado"

O quanto isso é importante para você?

- Extremamente importante
- Muito importante

- Moderadamente importante
  - Levemente importante
  - Nada importante
- 

Você selecionou "... Não sustenta o suficiente"

O quanto isso é importante para você?

- Extremamente importante
  - Muito importante
  - Moderadamente importante
  - Levemente importante
  - Nada importante
- 

Você selecionou "... Não é saudável"

O quanto isso é importante para você?

- Extremamente importante
  - Muito importante
  - Moderadamente importante
  - Levemente importante
  - Nada importante
- 

Você selecionou "... Não é conveniente"

O quanto isso é importante para você?

- Extremamente importante
  - Muito importante
  - Moderadamente importante
  - Levemente importante
  - Nada importante
-

Você selecionou "... Eu não quero me dar ao luxo"

O quanto isso é importante para você?

- Extremamente importante
  - Muito importante
  - Moderadamente importante
  - Levemente importante
  - Nada importante
- 

Você selecionou "... Não é apropriado para a situação"

O quanto isso é importante para você?

- Extremamente importante
  - Muito importante
  - Moderadamente importante
  - Levemente importante
  - Nada importante
- 

Você selecionou "... Não é um alimento que eu como perto de outras pessoas"

O quanto isso é importante para você?

- Extremamente importante
  - Muito importante
  - Moderadamente importante
  - Levemente importante
  - Nada importante
- 

Você selecionou "... O preço está muito alto"

O quanto isso é importante para você?

- Extremamente importante
- Muito importante

- Moderadamente importante
  - Levemente importante
  - Nada importante
- 

Você selecionou "... Eu não gosto do jeito que parece"

O quanto isso é importante para você?

- Extremamente importante
  - Muito importante
  - Moderadamente importante
  - Levemente importante
  - Nada importante
- 

Você selecionou "... Muito rico em calorias"

O quanto isso é importante para você?

- Extremamente importante
  - Muito importante
  - Moderadamente importante
  - Levemente importante
  - Nada importante
- 

Você selecionou "... Eu não devo comer isso"

O quanto isso é importante para você?

- Extremamente importante
  - Muito importante
  - Moderadamente importante
  - Levemente importante
  - Nada importante
-

Você selecionou "... Comer isso me faz parecer antiquado"

O quanto isso é importante para você?

- Extremamente importante
  - Muito importante
  - Moderadamente importante
  - Levemente importante
  - Nada importante
- 

Você selecionou ".. Não é nada que eu queira comer agora"

O quanto isso é importante para você?

- Extremamente importante
  - Muito importante
  - Moderadamente importante
  - Levemente importante
  - Nada importante
- 

Você selecionou ".. Eu comi recentemente e não quero comer a mesma comida com tanta frequência"

O quanto isso é importante para você?

- Extremamente importante
  - Muito importante
  - Moderadamente importante
  - Levemente importante
  - Nada importante
- 

Você selecionou "... Eu nunca escolheria isso e eu gosto de comer a mesma comida todos os dias"

O quanto isso é importante para você?

- Extremamente importante
  - Muito importante
  - Moderadamente importante
  - Levemente importante
  - Nada importante
- 

Você selecionou "... Essa comida me faz sentir triste, solitário e frustrado"

O quanto isso é importante para você?

- Extremamente importante
  - Muito importante
  - Moderadamente importante
  - Levemente importante
  - Nada importante
- 

Você selecionou "... Não é orgânico"

O quanto isso é importante para você?

- Extremamente importante
  - Muito importante
  - Moderadamente importante
  - Levemente importante
  - Nada importante
- 

## Reasons for Fruit Choices(RATA)

---

Você consome banana?

- Sim
- Não

## Quais as razões pelas quais você come banana? (Marque todas as respostas que correspondem)

- ... porque é saboroso
- ... porque me sacia de forma agradável
- ... porque normalmente eu como isso
- ... porque é orgânico
- ... porque me faz parecer melhor na frente dos outros
- ... porque eu curto
- ... para manter uma dieta balanceada
- ... porque é natural (exemplo, não geneticamente modificado)
- ... porque tem baixas calorias
- ... porque estou habituado
- ... porque eu não quero gastar muito dinheiro
- ... porque me mantém em forma exemplo, vigoroso, dinâmico
- ... porque é saudável
- ... porque eu devo comer
- ... porque é a única escolha
- ... porque eu preciso de energia
- ... porque estou frustrado
- ... porque é mais conveniente
- ... porque eu me sinto sozinho
- ... porque eu vejo propaganda em algum lugar ou vejo na TV
- ... para não desapontar alguém que está tentando me agradar
- ... porque eu cresci comendo isso
- ... porque me é familiar
- ... porque eu controlo meu peso
- ... porque não faz parte das tradições como Natal, Ano Novo e ocasiões especiais
- ... porque não é caro
- ... porque deixa as reuniões sociais mais agradáveis
- ... porque é sociável
- ... porque eu posso desfrutar o momento com outras pessoas

- ... porque tem pouca gordura
  - ... para compensar
  - ... porque me dou ao luxo
  - ... porque estou faminto
  - ... porque seria falta de educação não comer isso
  - ... porque os outros gostam
  - ... porque é fácil de preparar
  - ... porque me atrai aparentemente, por exemplo cores atraentes
  - ... porque não contém substâncias perigosas como agrotóxicos, poluentes, antibióticos
  - ... porque eu estou triste
  - ... porque faz parte de certas situações
  - ... porque eu gosto
  - ... porque é moda
  - ... porque é rápido de preparar
  - ... porque está em promoção
  - ... porque eu tenho vontade de comer isso
  - ... porque a apresentação é atraente, por exemplo a embalagem
  - ... porque eu quero comer todos os dias
- 

Você selecionou "... porque estou habituado "

O quanto isso é importante para você?

- Extremamente importante
  - Muito importante
  - Moderadamente importante
  - Levemente importante
  - Nada importante
- 

Você selecionou "... porque é saudável "

O quanto isso é importante para você?



- Extremamente importante
  - Muito importante
  - Moderadamente importante
  - Levemente importante
  - Nada importante
- 

Você selecionou "... porque é rápido de preparar "

O quanto isso é importante para você?

- Extremamente importante
  - Muito importante
  - Moderadamente importante
  - Levemente importante
  - Nada importante
- 

Você selecionou "... porque é saboroso "

O quanto isso é importante para você?

- Extremamente importante
  - Muito importante
  - Moderadamente importante
  - Levemente importante
  - Nada importante
- 

Você selecionou "... porque me dou ao luxo "

O quanto isso é importante para você?

- Extremamente importante
- Muito importante
- Moderadamente importante
- Levemente importante
- Nada importante

---

Você selecionou "... porque é natural (exemplo, não geneticamente modificado) "

O quanto isso é importante para você?

- Extremamente importante
- Muito importante
- Moderadamente importante
- Levemente importante
- Nada importante

---

Você selecionou "... porque eu não quero gastar muito dinheiro "

O quanto isso é importante para você?

- Extremamente importante
- Muito importante
- Moderadamente importante
- Levemente importante
- Nada importante

---

Você selecionou "... porque tem baixas calorias "

O quanto isso é importante para você?

- Extremamente importante
- Muito importante
- Moderadamente importante
- Levemente importante
- Nada importante

---

Você selecionou "... porque estou frustrado "

O quanto isso é importante para você?

- Extremamente importante
  - Muito importante
  - Moderadamente importante
  - Levemente importante
  - Nada importante
- 

Você selecionou "... porque me faz parecer melhor na frente dos outros "

O quanto isso é importante para você?

- Extremamente importante
  - Muito importante
  - Moderadamente importante
  - Levemente importante
  - Nada importante
- 

Você selecionou "... porque seria falta de educação não comer isso "

O quanto isso é importante para você?

- Extremamente importante
  - Muito importante
  - Moderadamente importante
  - Levemente importante
  - Nada importante
- 

Você selecionou "... porque a apresentação é atraente, por exemplo a embalagem "

O quanto isso é importante para você?

- Extremamente importante
- Muito importante
- Moderadamente importante
- Levemente importante

Nada importante

---

Você selecionou "... porque eu posso desfrutar o momento com outras pessoas "

O quanto isso é importante para você?

- Extremamente importante
  - Muito importante
  - Moderadamente importante
  - Levemente importante
  - Nada importante
- 

Você selecionou "... porque é orgânico "

O quanto isso é importante para você?

- Extremamente importante
  - Muito importante
  - Moderadamente importante
  - Levemente importante
  - Nada importante
- 

Você selecionou "... porque eu cresci comendo isso "

O quanto isso é importante para você?

- Extremamente importante
  - Muito importante
  - Moderadamente importante
  - Levemente importante
  - Nada importante
- 

Você selecionou "... porque eu curto "

O quanto isso é importante para você?

- Extremamente importante
  - Muito importante
  - Moderadamente importante
  - Levemente importante
  - Nada importante
- 

Você selecionou "... porque estou faminto "

O quanto isso é importante para você?

- Extremamente importante
  - Muito importante
  - Moderadamente importante
  - Levemente importante
  - Nada importante
- 

Você selecionou "... porque normalmente eu como isso "

O quanto isso é importante para você?

- Extremamente importante
  - Muito importante
  - Moderadamente importante
  - Levemente importante
  - Nada importante
- 

Você selecionou "... porque eu tenho vontade de comer isso "

O quanto isso é importante para você?

- Extremamente importante
- Muito importante
- Moderadamente importante
- Levemente importante

Nada importante

---

Você selecionou "... porque é fácil de preparar "

O quanto isso é importante para você?

- Extremamente importante
  - Muito importante
  - Moderadamente importante
  - Levemente importante
  - Nada importante
- 

Você selecionou "... porque eu estou triste "

O quanto isso é importante para você?

- Extremamente importante
  - Muito importante
  - Moderadamente importante
  - Levemente importante
  - Nada importante
- 

Você selecionou "... porque tem pouca gordura "

O quanto isso é importante para você?

- Extremamente importante
  - Muito importante
  - Moderadamente importante
  - Levemente importante
  - Nada importante
- 

Você selecionou "... porque eu vejo propaganda em algum lugar ou vejo na TV "

O quanto isso é importante para você?

- Extremamente importante
  - Muito importante
  - Moderadamente importante
  - Levemente importante
  - Nada importante
- 

Você selecionou "... porque deixa as reuniões sociais mais agradáveis "

O quanto isso é importante para você?

- Extremamente importante
  - Muito importante
  - Moderadamente importante
  - Levemente importante
  - Nada importante
- 

Você selecionou "... porque eu devo comer "

O quanto isso é importante para você?

- Extremamente importante
  - Muito importante
  - Moderadamente importante
  - Levemente importante
  - Nada importante
- 

Você selecionou "... porque os outros gostam "

O quanto isso é importante para você?

- Extremamente importante
- Muito importante
- Moderadamente importante
- Levemente importante

Nada importante

---

Você selecionou "... porque eu me sinto sozinho "

O quanto isso é importante para você?

- Extremamente importante
  - Muito importante
  - Moderadamente importante
  - Levemente importante
  - Nada importante
- 

Você selecionou "... porque eu controlo meu peso "

O quanto isso é importante para você?

- Extremamente importante
  - Muito importante
  - Moderadamente importante
  - Levemente importante
  - Nada importante
- 

Você selecionou "... porque não contém substâncias perigosas como agrotóxicos, poluentes, antibióticos "

O quanto isso é importante para você?

- Extremamente importante
  - Muito importante
  - Moderadamente importante
  - Levemente importante
  - Nada importante
- 

Você selecionou "... porque é mais conveniente "



O quanto isso é importante para você?

- Extremamente importante
  - Muito importante
  - Moderadamente importante
  - Levemente importante
  - Nada importante
- 

Você selecionou "... porque eu preciso de energia "

O quanto isso é importante para você?

- Extremamente importante
  - Muito importante
  - Moderadamente importante
  - Levemente importante
  - Nada importante
- 

Você selecionou "... porque me é familiar "

O quanto isso é importante para você?

- Extremamente importante
  - Muito importante
  - Moderadamente importante
  - Levemente importante
  - Nada importante
- 

Você selecionou "... porque eu gosto "

O quanto isso é importante para você?

- Extremamente importante
- Muito importante
- Moderadamente importante

- Levemente importante
  - Nada importante
- 

Você selecionou "... porque me sacia de forma agradável "

O quanto isso é importante para você?

- Extremamente importante
  - Muito importante
  - Moderadamente importante
  - Levemente importante
  - Nada importante
- 

Você selecionou "... para compensar "

O quanto isso é importante para você?

- Extremamente importante
  - Muito importante
  - Moderadamente importante
  - Levemente importante
  - Nada importante
- 

Você selecionou "... porque não faz parte das tradições como Natal, Ano Novo e ocasiões especiais "

O quanto isso é importante para você?

- Extremamente importante
  - Muito importante
  - Moderadamente importante
  - Levemente importante
  - Nada importante
-

Você selecionou "... porque faz parte de certas situações "

O quanto isso é importante para você?

- Extremamente importante
  - Muito importante
  - Moderadamente importante
  - Levemente importante
  - Nada importante
- 

Você selecionou "... para manter uma dieta balanceada "

O quanto isso é importante para você?

- Extremamente importante
  - Muito importante
  - Moderadamente importante
  - Levemente importante
  - Nada importante
- 

Você selecionou "... porque é sociável "

O quanto isso é importante para você?

- Extremamente importante
  - Muito importante
  - Moderadamente importante
  - Levemente importante
  - Nada importante
- 

Você selecionou "... porque não é caro "

O quanto isso é importante para você?

- Extremamente importante
- Muito importante

- Moderadamente importante
  - Levemente importante
  - Nada importante
- 

Você selecionou "... porque me atrai aparentemente, por exemplo cores atraentes "

O quanto isso é importante para você?

- Extremamente importante
  - Muito importante
  - Moderadamente importante
  - Levemente importante
  - Nada importante
- 

Você selecionou "... para não desapontar alguém que está tentando me agradar "

O quanto isso é importante para você?

- Extremamente importante
  - Muito importante
  - Moderadamente importante
  - Levemente importante
  - Nada importante
- 

Você selecionou "... porque é moda "

O quanto isso é importante para você?

- Extremamente importante
- Muito importante
- Moderadamente importante
- Levemente importante
- Nada importante

Você selecionou "... porque está em promoção "

O quanto isso é importante para você?

- Extremamente importante
  - Muito importante
  - Moderadamente importante
  - Levemente importante
  - Nada importante
- 

Você selecionou "... porque me mantém em forma exemplo, vigoroso, dinâmico "

O quanto isso é importante para você?

- Extremamente importante
  - Muito importante
  - Moderadamente importante
  - Levemente importante
  - Nada importante
- 

Você selecionou "... porque é a única escolha "

O quanto isso é importante para você?

- Extremamente importante
  - Muito importante
  - Moderadamente importante
  - Levemente importante
  - Nada importante
- 

Você selecionou "... porque eu quero comer todos os dias "

O quanto isso é importante para você?

- Extremamente importante

- Muito importante
  - Moderadamente importante
  - Levemente importante
  - Nada importante
- 

**Quais as razões pelas quais você não come banana? (Marque todas as respostas que correspondem)**

- ... O preço está muito alto
  - ... Não é orgânico
  - ... Não é saudável
  - ... Não sustenta o suficiente
  - ... Eu não quero me dar ao luxo
  - ... Muito rico em calorias
  - ... Eu não gosto do jeito que parece
  - ... Não é conveniente
  - ... Eu normalmente não como isso
  - ... Eu não acho que seja um lanche
  - ... Não é apropriado para a situação
  - ... Essa comida me faz sentir triste, solitário e frustrado
  - ... Eu não gosto disso
  - ... Eu não devo comer isso
  - .. Eu comi recentemente e não quero comer a mesma comida com tanta frequência
  - ... O tamanho da porção não é adequado
  - .. Não é nada que eu queira comer agora
  - ... Eu nunca escolheria isso e eu gosto de comer a mesma comida todos os dias
  - ... Não é um alimento que eu como perto de outras pessoas
  - ... Comer isso me faz parecer antiquado
- 

Você selecionou "... Eu não acho que seja um lanche"

O quanto isso é importante para você?

- Extremamente importante
  - Muito importante
  - Moderadamente importante
  - Levemente importante
  - Nada importante
- 

Você selecionou "... Eu não gosto disso"

O quanto isso é importante para você?

- Extremamente importante
  - Muito importante
  - Moderadamente importante
  - Levemente importante
  - Nada importante
- 

Você selecionou "... Eu normalmente não como isso"

O quanto isso é importante para você?

- Extremamente importante
  - Muito importante
  - Moderadamente importante
  - Levemente importante
  - Nada importante
- 

Você selecionou "... O tamanho da porção não é adequado"

O quanto isso é importante para você?

- Extremamente importante
- Muito importante
- Moderadamente importante
- Levemente importante

Nada importante

---

Você selecionou "... Não sustenta o suficiente"

O quanto isso é importante para você?

- Extremamente importante
  - Muito importante
  - Moderadamente importante
  - Levemente importante
  - Nada importante
- 

Você selecionou "... Não é saudável"

O quanto isso é importante para você?

- Extremamente importante
  - Muito importante
  - Moderadamente importante
  - Levemente importante
  - Nada importante
- 

Você selecionou "... Não é conveniente"

O quanto isso é importante para você?

- Extremamente importante
  - Muito importante
  - Moderadamente importante
  - Levemente importante
  - Nada importante
- 

Você selecionou "... Eu não quero me dar ao luxo"

O quanto isso é importante para você?



- Extremamente importante
  - Muito importante
  - Moderadamente importante
  - Levemente importante
  - Nada importante
- 

Você selecionou "... Não é apropriado para a situação"

O quanto isso é importante para você?

- Extremamente importante
  - Muito importante
  - Moderadamente importante
  - Levemente importante
  - Nada importante
- 

Você selecionou "... Não é um alimento que eu como perto de outras pessoas"

O quanto isso é importante para você?

- Extremamente importante
  - Muito importante
  - Moderadamente importante
  - Levemente importante
  - Nada importante
- 

Você selecionou "... O preço está muito alto"

O quanto isso é importante para você?

- Extremamente importante
- Muito importante
- Moderadamente importante
- Levemente importante

Nada importante

---

Você selecionou "... Eu não gosto do jeito que parece"

O quanto isso é importante para você?

- Extremamente importante
  - Muito importante
  - Moderadamente importante
  - Levemente importante
  - Nada importante
- 

Você selecionou "... Muito rico em calorias"

O quanto isso é importante para você?

- Extremamente importante
  - Muito importante
  - Moderadamente importante
  - Levemente importante
  - Nada importante
- 

Você selecionou "... Eu não devo comer isso"

O quanto isso é importante para você?

- Extremamente importante
  - Muito importante
  - Moderadamente importante
  - Levemente importante
  - Nada importante
- 

Você selecionou "... Comer isso me faz parecer antiquado"

O quanto isso é importante para você?

- Extremamente importante
  - Muito importante
  - Moderadamente importante
  - Levemente importante
  - Nada importante
- 

Você selecionou ".. Não é nada que eu queira comer agora"

O quanto isso é importante para você?

- Extremamente importante
  - Muito importante
  - Moderadamente importante
  - Levemente importante
  - Nada importante
- 

Você selecionou ".. Eu comi recentemente e não quero comer a mesma comida com tanta frequência"

O quanto isso é importante para você?

- Extremamente importante
  - Muito importante
  - Moderadamente importante
  - Levemente importante
  - Nada importante
- 

Você selecionou "... Eu nunca escolheria isso e eu gosto de comer a mesma comida todos os dias"

O quanto isso é importante para você?

- Extremamente importante
- Muito importante
- Moderadamente importante

- Levemente importante
  - Nada importante
- 

Você selecionou "... Essa comida me faz sentir triste, solitário e frustrado"

O quanto isso é importante para você?

- Extremamente importante
  - Muito importante
  - Moderadamente importante
  - Levemente importante
  - Nada importante
- 

Você selecionou "... Não é orgânico"

O quanto isso é importante para você?

- Extremamente importante
  - Muito importante
  - Moderadamente importante
  - Levemente importante
  - Nada importante
- 

## Reasons for Sweet food Choices(RATA)

---

Você consome brigadeiro?

- Sim
  - Não
- 

**Quais as razões pelas quais você come brigadeiro? (Marque todas as respostas que correspondem)**

- ... porque está em promoção
- ... porque tem pouca gordura
- ... porque estou faminto
- ... porque tem baixas calorias
- ... porque estou habituado
- ... porque me mantém em forma exemplo, vigoroso, dinâmico
- ... porque os outros gostam
- ... porque é orgânico
- ... porque é saudável
- ... porque estou frustrado
- ... porque seria falta de educação não comer isso
- ... porque eu preciso de energia
- ... para manter uma dieta balanceada
- ... porque eu não quero gastar muito dinheiro
- ... porque é saboroso
- ... porque eu cresci comendo isso
- ... porque normalmente eu como isso
- ... porque eu posso desfrutar o momento com outras pessoas
- ... porque me atrai aparentemente, por exemplo cores atraentes
- ... porque eu controlo meu peso
- ... porque é rápido de preparar
- ... para compensar
- ... porque não é caro
- ... porque eu devo comer
- ... para não desapontar alguém que está tentando me agradar
- ... porque é a única escolha
- ... porque não faz parte das tradições como Natal, Ano Novo e ocasiões especiais
- ... porque me sacia de forma agradável
- ... porque é natural (exemplo, não geneticamente modificado)
- ... porque me faz parecer melhor na frente dos outros
- ... porque deixa as reuniões sociais mais agradáveis
- ... porque a apresentação é atraente, por exemplo a embalagem

- ... porque é mais conveniente
  - ... porque eu quero comer todos os dias
  - ... porque eu gosto
  - ... porque eu curto
  - ... porque eu tenho vontade de comer isso
  - ... porque é fácil de preparar
  - ... porque faz parte de certas situações
  - ... porque é sociável
  - ... porque eu me sinto sozinho
  - ... porque eu estou triste
  - ... porque me dou ao luxo
  - ... porque eu vejo propaganda em algum lugar ou vejo na TV
  - ... porque não contém substâncias perigosas como agrotóxicos, poluentes, antibióticos
  - ... porque é moda
  - ... porque me é familiar
- 

Você selecionou "... porque estou habituado "

O quanto isso é importante para você?

- Extremamente importante
  - Muito importante
  - Moderadamente importante
  - Levemente importante
  - Nada importante
- 

Você selecionou "... porque é saudável "

O quanto isso é importante para você?

- Extremamente importante
- Muito importante
- Moderadamente importante

- Levemente importante
  - Nada importante
- 

Você selecionou "... porque é rápido de preparar "

O quanto isso é importante para você?

- Extremamente importante
  - Muito importante
  - Moderadamente importante
  - Levemente importante
  - Nada importante
- 

Você selecionou "... porque é saboroso "

O quanto isso é importante para você?

- Extremamente importante
  - Muito importante
  - Moderadamente importante
  - Levemente importante
  - Nada importante
- 

Você selecionou "... porque me dou ao luxo "

O quanto isso é importante para você?

- Extremamente importante
  - Muito importante
  - Moderadamente importante
  - Levemente importante
  - Nada importante
- 

Você selecionou "... porque é natural (exemplo, não geneticamente modificado) "

O quanto isso é importante para você?

- Extremamente importante
  - Muito importante
  - Moderadamente importante
  - Levemente importante
  - Nada importante
- 

Você selecionou "... porque eu não quero gastar muito dinheiro "

O quanto isso é importante para você?

- Extremamente importante
  - Muito importante
  - Moderadamente importante
  - Levemente importante
  - Nada importante
- 

Você selecionou "... porque tem baixas calorias "

O quanto isso é importante para você?

- Extremamente importante
  - Muito importante
  - Moderadamente importante
  - Levemente importante
  - Nada importante
- 

Você selecionou "... porque estou frustrado "

O quanto isso é importante para você?

- Extremamente importante
- Muito importante
- Moderadamente importante



- Levemente importante
  - Nada importante
- 

Você selecionou "... porque me faz parecer melhor na frente dos outros "

O quanto isso é importante para você?

- Extremamente importante
  - Muito importante
  - Moderadamente importante
  - Levemente importante
  - Nada importante
- 

Você selecionou "... porque seria falta de educação não comer isso "

O quanto isso é importante para você?

- Extremamente importante
  - Muito importante
  - Moderadamente importante
  - Levemente importante
  - Nada importante
- 

Você selecionou "... porque a apresentação é atraente, por exemplo a embalagem "

O quanto isso é importante para você?

- Extremamente importante
  - Muito importante
  - Moderadamente importante
  - Levemente importante
  - Nada importante
-

Você selecionou "... porque eu posso desfrutar o momento com outras pessoas "

O quanto isso é importante para você?

- Extremamente importante
  - Muito importante
  - Moderadamente importante
  - Levemente importante
  - Nada importante
- 

Você selecionou "... porque é orgânico "

O quanto isso é importante para você?

- Extremamente importante
  - Muito importante
  - Moderadamente importante
  - Levemente importante
  - Nada importante
- 

Você selecionou "... porque eu cresci comendo isso "

O quanto isso é importante para você?

- Extremamente importante
  - Muito importante
  - Moderadamente importante
  - Levemente importante
  - Nada importante
- 

Você selecionou "... porque eu curto "

O quanto isso é importante para você?

- Extremamente importante
- Muito importante

- Moderadamente importante
  - Levemente importante
  - Nada importante
- 

Você selecionou "... porque estou faminto "

O quanto isso é importante para você?

- Extremamente importante
  - Muito importante
  - Moderadamente importante
  - Levemente importante
  - Nada importante
- 

Você selecionou "... porque normalmente eu como isso "

O quanto isso é importante para você?

- Extremamente importante
  - Muito importante
  - Moderadamente importante
  - Levemente importante
  - Nada importante
- 

Você selecionou "... porque eu tenho vontade de comer isso "

O quanto isso é importante para você?

- Extremamente importante
  - Muito importante
  - Moderadamente importante
  - Levemente importante
  - Nada importante
-

Você selecionou "... porque é fácil de preparar "

O quanto isso é importante para você?

- Extremamente importante
  - Muito importante
  - Moderadamente importante
  - Levemente importante
  - Nada importante
- 

Você selecionou "... porque eu estou triste "

O quanto isso é importante para você?

- Extremamente importante
  - Muito importante
  - Moderadamente importante
  - Levemente importante
  - Nada importante
- 

Você selecionou "... porque tem pouca gordura "

O quanto isso é importante para você?

- Extremamente importante
  - Muito importante
  - Moderadamente importante
  - Levemente importante
  - Nada importante
- 

Você selecionou "... porque eu vejo propaganda em algum lugar ou vejo na TV "

O quanto isso é importante para você?

- Extremamente importante
- Muito importante

- Moderadamente importante
  - Levemente importante
  - Nada importante
- 

Você selecionou "... porque deixa as reuniões sociais mais agradáveis "

O quanto isso é importante para você?

- Extremamente importante
  - Muito importante
  - Moderadamente importante
  - Levemente importante
  - Nada importante
- 

Você selecionou "... porque eu devo comer "

O quanto isso é importante para você?

- Extremamente importante
  - Muito importante
  - Moderadamente importante
  - Levemente importante
  - Nada importante
- 

Você selecionou "... porque os outros gostam "

O quanto isso é importante para você?

- Extremamente importante
  - Muito importante
  - Moderadamente importante
  - Levemente importante
  - Nada importante
-

Você selecionou "... porque eu me sinto sozinho "

O quanto isso é importante para você?

- Extremamente importante
  - Muito importante
  - Moderadamente importante
  - Levemente importante
  - Nada importante
- 

Você selecionou "... porque eu controlo meu peso "

O quanto isso é importante para você?

- Extremamente importante
  - Muito importante
  - Moderadamente importante
  - Levemente importante
  - Nada importante
- 

Você selecionou "... porque não contém substâncias perigosas como agrotóxicos, poluentes, antibióticos "

O quanto isso é importante para você?

- Extremamente importante
  - Muito importante
  - Moderadamente importante
  - Levemente importante
  - Nada importante
- 

Você selecionou "... porque é mais conveniente "

O quanto isso é importante para você?

- Extremamente importante

- Muito importante
  - Moderadamente importante
  - Levemente importante
  - Nada importante
- 

Você selecionou "... porque eu preciso de energia "

O quanto isso é importante para você?

- Extremamente importante
  - Muito importante
  - Moderadamente importante
  - Levemente importante
  - Nada importante
- 

Você selecionou "... porque me é familiar "

O quanto isso é importante para você?

- Extremamente importante
  - Muito importante
  - Moderadamente importante
  - Levemente importante
  - Nada importante
- 

Você selecionou "... porque eu gosto "

O quanto isso é importante para você?

- Extremamente importante
- Muito importante
- Moderadamente importante
- Levemente importante
- Nada importante

---

Você selecionou "... porque me sacia de forma agradável "

O quanto isso é importante para você?

- Extremamente importante
  - Muito importante
  - Moderadamente importante
  - Levemente importante
  - Nada importante
- 

Você selecionou "... para compensar "

O quanto isso é importante para você?

- Extremamente importante
  - Muito importante
  - Moderadamente importante
  - Levemente importante
  - Nada importante
- 

Você selecionou "... porque não faz parte das tradições como Natal, Ano Novo e ocasiões especiais "

O quanto isso é importante para você?

- Extremamente importante
  - Muito importante
  - Moderadamente importante
  - Levemente importante
  - Nada importante
- 

Você selecionou "... porque faz parte de certas situações "

O quanto isso é importante para você?

- Extremamente importante



- Muito importante
  - Moderadamente importante
  - Levemente importante
  - Nada importante
- 

Você selecionou "... para manter uma dieta balanceada "

O quanto isso é importante para você?

- Extremamente importante
  - Muito importante
  - Moderadamente importante
  - Levemente importante
  - Nada importante
- 

Você selecionou "... porque é sociável "

O quanto isso é importante para você?

- Extremamente importante
  - Muito importante
  - Moderadamente importante
  - Levemente importante
  - Nada importante
- 

Você selecionou "... porque não é caro "

O quanto isso é importante para você?

- Extremamente importante
- Muito importante
- Moderadamente importante
- Levemente importante
- Nada importante

Você selecionou "... porque me atrai aparentemente, por exemplo cores atraentes "

O quanto isso é importante para você?

- Extremamente importante
- Muito importante
- Moderadamente importante
- Levemente importante
- Nada importante

Você selecionou "... para não desapontar alguém que está tentando me agradar "

O quanto isso é importante para você?

- Extremamente importante
- Muito importante
- Moderadamente importante
- Levemente importante
- Nada importante

Você selecionou "... porque é moda "

O quanto isso é importante para você?

- Extremamente importante
- Muito importante
- Moderadamente importante
- Levemente importante
- Nada importante

Você selecionou "... porque está em promoção "

O quanto isso é importante para você?

- Extremamente importante

- Muito importante
  - Moderadamente importante
  - Levemente importante
  - Nada importante
- 

Você selecionou "... porque me mantém em forma exemplo, vigoroso, dinâmico "

O quanto isso é importante para você?

- Extremamente importante
  - Muito importante
  - Moderadamente importante
  - Levemente importante
  - Nada importante
- 

Você selecionou "... porque é a única escolha "

O quanto isso é importante para você?

- Extremamente importante
  - Muito importante
  - Moderadamente importante
  - Levemente importante
  - Nada importante
- 

Você selecionou "... porque eu quero comer todos os dias "

O quanto isso é importante para você?

- Extremamente importante
- Muito importante
- Moderadamente importante
- Levemente importante
- Nada importante

## Quais as razões pelas quais você não come brigadeiro? (Marque todas as respostas que correspondem)

- ... Comer isso me faz parecer antiquado
- ... Eu não gosto do jeito que parece
- ... Eu nunca escolheria isso e eu gosto de comer a mesma comida todos os dias
- .. Não é nada que eu queira comer agora
- ... Eu não quero me dar ao luxo
- .. Eu comi recentemente e não quero comer a mesma comida com tanta frequência
- ... Essa comida me faz sentir triste, solitário e frustrado
- ... Muito rico em calorias
- ... Eu normalmente não como isso
- ... Não é saudável
- ... O preço está muito alto
- ... Não sustenta o suficiente
- ... Eu não devo comer isso
- ... Não é apropriado para a situação
- ... Não é um alimento que eu como perto de outras pessoas
- ... Não é conveniente
- ... Eu não acho que seja um lanche
- ... O tamanho da porção não é adequado
- ... Não é orgânico
- ... Eu não gosto disso

Você selecionou "... Eu não acho que seja um lanche"

O quanto isso é importante para você?

- Extremamente importante
- Muito importante
- Moderadamente importante
- Levemente importante

Nada importante

---

Você selecionou "... Eu não gosto disso"

O quanto isso é importante para você?

- Extremamente importante
  - Muito importante
  - Moderadamente importante
  - Levemente importante
  - Nada importante
- 

Você selecionou "... Eu normalmente não como isso"

O quanto isso é importante para você?

- Extremamente importante
  - Muito importante
  - Moderadamente importante
  - Levemente importante
  - Nada importante
- 

Você selecionou "... O tamanho da porção não é adequado"

O quanto isso é importante para você?

- Extremamente importante
  - Muito importante
  - Moderadamente importante
  - Levemente importante
  - Nada importante
- 

Você selecionou "... Não sustenta o suficiente"

O quanto isso é importante para você?

- Extremamente importante
  - Muito importante
  - Moderadamente importante
  - Levemente importante
  - Nada importante
- 

Você selecionou "... Não é saudável"

O quanto isso é importante para você?

- Extremamente importante
  - Muito importante
  - Moderadamente importante
  - Levemente importante
  - Nada importante
- 

Você selecionou "... Não é conveniente"

O quanto isso é importante para você?

- Extremamente importante
  - Muito importante
  - Moderadamente importante
  - Levemente importante
  - Nada importante
- 

Você selecionou "... Eu não quero me dar ao luxo"

O quanto isso é importante para você?

- Extremamente importante
- Muito importante
- Moderadamente importante
- Levemente importante

Nada importante

---

Você selecionou "... Não é apropriado para a situação"

O quanto isso é importante para você?

- Extremamente importante
  - Muito importante
  - Moderadamente importante
  - Levemente importante
  - Nada importante
- 

Você selecionou "... Não é um alimento que eu como perto de outras pessoas"

O quanto isso é importante para você?

- Extremamente importante
  - Muito importante
  - Moderadamente importante
  - Levemente importante
  - Nada importante
- 

Você selecionou "... O preço está muito alto"

O quanto isso é importante para você?

- Extremamente importante
  - Muito importante
  - Moderadamente importante
  - Levemente importante
  - Nada importante
- 

Você selecionou "... Eu não gosto do jeito que parece"

O quanto isso é importante para você?

- Extremamente importante
  - Muito importante
  - Moderadamente importante
  - Levemente importante
  - Nada importante
- 

Você selecionou "... Muito rico em calorias"

O quanto isso é importante para você?

- Extremamente importante
  - Muito importante
  - Moderadamente importante
  - Levemente importante
  - Nada importante
- 

Você selecionou "... Eu não devo comer isso"

O quanto isso é importante para você?

- Extremamente importante
  - Muito importante
  - Moderadamente importante
  - Levemente importante
  - Nada importante
- 

Você selecionou "... Comer isso me faz parecer antiquado"

O quanto isso é importante para você?

- Extremamente importante
- Muito importante
- Moderadamente importante
- Levemente importante



Nada importante

---

Você selecionou ".. Não é nada que eu queira comer agora"

O quanto isso é importante para você?

- Extremamente importante
  - Muito importante
  - Moderadamente importante
  - Levemente importante
  - Nada importante
- 

Você selecionou ".. Eu comi recentemente e não quero comer a mesma comida com tanta frequência"

O quanto isso é importante para você?

- Extremamente importante
  - Muito importante
  - Moderadamente importante
  - Levemente importante
  - Nada importante
- 

Você selecionou "... Eu nunca escolheria isso e eu gosto de comer a mesma comida todos os dias"

O quanto isso é importante para você?

- Extremamente importante
  - Muito importante
  - Moderadamente importante
  - Levemente importante
  - Nada importante
-

Você selecionou "... Essa comida me faz sentir triste, solitário e frustrado"

O quanto isso é importante para você?

- Extremamente importante
  - Muito importante
  - Moderadamente importante
  - Levemente importante
  - Nada importante
- 

Você selecionou "... Não é orgânico"

O quanto isso é importante para você?

- Extremamente importante
  - Muito importante
  - Moderadamente importante
  - Levemente importante
  - Nada importante
- 

### Reasons for Starchy food choices(Full RATA)

---

Você consome arroz?

- Sim
  - Não
- 

Pense sobre as razões pelas quais você consome arroz.

O quanto essa afirmação é importante para você "...porque estou a acostumado a comer isso"

- Extremamente importante

- Muito importante
  - Moderadamente importante
  - Levemente importante
  - Nada importante
- 

Pense sobre as razões pelas quais você consome arroz.

O quanto essa afirmação é importante para você "...porque é saudável"

- Extremamente importante
  - Muito importante
  - Moderadamente importante
  - Levemente importante
  - Nada importante
- 

Pense sobre as razões pelas quais você consome arroz.

O quanto essa afirmação é importante para você "...porque é rápido de preparar"

- Extremamente importante
  - Muito importante
  - Moderadamente importante
  - Levemente importante
  - Nada importante
- 

Pense sobre as razões pelas quais você consome arroz.

O quanto essa afirmação é importante para você "...porque é saboroso"

- Extremamente importante
- Muito importante
- Moderadamente importante
- Levemente importante
- Nada importante

---

Pense sobre as razões pelas quais você consome arroz.

O quanto essa afirmação é importante para você "...porque eu me dou ao luxo"

- Extremamente importante
  - Muito importante
  - Moderadamente importante
  - Levemente importante
  - Nada importante
- 

Pense sobre as razões pelas quais você consome arroz.

O quanto essa afirmação é importante para você "...porque é natural (exemplo, não geneticamente modificado)"

- Extremamente importante
  - Muito importante
  - Moderadamente importante
  - Levemente importante
  - Nada importante
- 

Pense sobre as razões pelas quais você consome arroz.

O quanto essa afirmação é importante para você "...porque eu não quero gastar muito"

- Extremamente importante
  - Muito importante
  - Moderadamente importante
  - Levemente importante
  - Nada importante
- 

Pense sobre as razões pelas quais você consome arroz.

O quanto essa afirmação é importante para você "...porque tem baixas calorias"

- Extremamente importante
  - Muito importante
  - Moderadamente importante
  - Levemente importante
  - Nada importante
- 

Pense sobre as razões pelas quais você consome arroz.

O quanto essa afirmação é importante para você "...porque estou frustrado"

- Extremamente importante
  - Muito importante
  - Moderadamente importante
  - Levemente importante
  - Nada importante
- 

Pense sobre as razões pelas quais você consome arroz.

O quanto essa afirmação é importante para você "...porque me faz parecer melhor na frente dos outros "

- Extremamente importante
  - Muito importante
  - Moderadamente importante
  - Levemente importante
  - Nada importante
- 

Pense sobre as razões pelas quais você consome arroz.

O quanto essa afirmação é importante para você "...porque seria falta de educação não comer "

- Extremamente importante
- Muito importante
- Moderadamente importante

- Levemente importante
  - Nada importante
- 

Pense sobre as razões pelas quais você consome arroz.

O quanto essa afirmação é importante para você "...porque a apresentação é atraente (por exemplo a embalagem)"

- Extremamente importante
  - Muito importante
  - Moderadamente importante
  - Levemente importante
  - Nada importante
- 

Pense sobre as razões pelas quais você consome arroz.

O quanto essa afirmação é importante para você "...porque eu posso desfrutar o momento com outras pessoas"

- Extremamente importante
  - Muito importante
  - Moderadamente importante
  - Levemente importante
  - Nada importante
- 

Pense sobre as razões pelas quais você consome arroz.

O quanto essa afirmação é importante para você "...porque é orgânico"

- Extremamente importante
- Muito importante
- Moderadamente importante
- Levemente importante
- Nada importante

Pense sobre as razões pelas quais você consome arroz.

O quanto essa afirmação é importante para você "...porque eu cresci comendo isso"

- Extremamente importante
  - Muito importante
  - Moderadamente importante
  - Levemente importante
  - Nada importante
- 

Pense sobre as razões pelas quais você consome arroz.

O quanto essa afirmação é importante para você "...porque eu curto"

- Extremamente importante
  - Muito importante
  - Moderadamente importante
  - Levemente importante
  - Nada importante
- 

Pense sobre as razões pelas quais você consome arroz.

O quanto essa afirmação é importante para você "...porque eu estou faminto"

- Extremamente importante
  - Muito importante
  - Moderadamente importante
  - Levemente importante
  - Nada importante
- 

Pense sobre as razões pelas quais você consome arroz.

O quanto essa afirmação é importante para você "...porque eu tenho o hábito de comer"

- Extremamente importante
  - Muito importante
  - Moderadamente importante
  - Levemente importante
  - Nada importante
- 

Pense sobre as razões pelas quais você consome arroz.

O quanto essa afirmação é importante para você "...porque eu tenho vontade de comer isso"

- Extremamente importante
  - Muito importante
  - Moderadamente importante
  - Levemente importante
  - Nada importante
- 

Pense sobre as razões pelas quais você consome arroz.

O quanto essa afirmação é importante para você "...porque é fácil preparar"

- Extremamente importante
  - Muito importante
  - Moderadamente importante
  - Levemente importante
  - Nada importante
- 

Pense sobre as razões pelas quais você consome arroz.

O quanto essa afirmação é importante para você "...porque eu estou triste"

- Extremamente importante
- Muito importante
- Moderadamente importante
- Levemente importante



Nada importante

---

Pense sobre as razões pelas quais você consome arroz.

O quanto essa afirmação é importante para você "...porque tem pouca gordura"

- Extremamente importante
  - Muito importante
  - Moderadamente importante
  - Levemente importante
  - Nada importante
- 

Pense sobre as razões pelas quais você consome arroz.

O quanto essa afirmação é importante para você "...porque eu vi propaganda em algum lugar ou vi na TV"

- Extremamente importante
  - Muito importante
  - Moderadamente importante
  - Levemente importante
  - Nada importante
- 

Pense sobre as razões pelas quais você consome arroz.

O quanto essa afirmação é importante para você "...porque deixa as reuniões sociais mais agradáveis"

- Extremamente importante
  - Muito importante
  - Moderadamente importante
  - Levemente importante
  - Nada importante
-

Pense sobre as razões pelas quais você consome arroz.

O quanto essa afirmação é importante para você "...porque eu devo comer"

- Extremamente importante
  - Muito importante
  - Moderadamente importante
  - Levemente importante
  - Nada importante
- 

Pense sobre as razões pelas quais você consome arroz.

O quanto essa afirmação é importante para você "...porque os outros gostam"

- Extremamente importante
  - Muito importante
  - Moderadamente importante
  - Levemente importante
  - Nada importante
- 

Pense sobre as razões pelas quais você consome arroz.

O quanto essa afirmação é importante para você "...porque eu me sinto sozinho"

- Extremamente importante
  - Muito importante
  - Moderadamente importante
  - Levemente importante
  - Nada importante
- 

Pense sobre as razões pelas quais você consome arroz.

O quanto essa afirmação é importante para você "...porque eu controlo meu peso"

- Extremamente importante
- Muito importante

- Moderadamente importante
  - Levemente importante
  - Nada importante
- 

Pense sobre as razões pelas quais você consome arroz.

O quanto essa afirmação é importante para você "...porque não contém substâncias perigosas (por exemplo, agrotóxicos, poluentes, antibióticos)"

- Extremamente importante
  - Muito importante
  - Moderadamente importante
  - Levemente importante
  - Nada importante
- 

Pense sobre as razões pelas quais você consome arroz.

O quanto essa afirmação é importante para você "...porque é mais conveniente"

- Extremamente importante
  - Muito importante
  - Moderadamente importante
  - Levemente importante
  - Nada importante
- 

Pense sobre as razões pelas quais você consome arroz.

O quanto essa afirmação é importante para você "...porque eu preciso de energia"

- Extremamente importante
- Muito importante
- Moderadamente importante
- Levemente importante
- Nada importante

---

Pense sobre as razões pelas quais você consome arroz.

O quanto essa afirmação é importante para você "...porque me é familiar"

- Extremamente importante
  - Muito importante
  - Moderadamente importante
  - Levemente importante
  - Nada importante
- 

Pense sobre as razões pelas quais você consome arroz.

O quanto essa afirmação é importante para você "...porque eu gosto"

- Extremamente importante
  - Muito importante
  - Moderadamente importante
  - Levemente importante
  - Nada importante
- 

Pense sobre as razões pelas quais você consome arroz.

O quanto essa afirmação é importante para você "...porque me sacia de forma agradável"

- Extremamente importante
  - Muito importante
  - Moderadamente importante
  - Levemente importante
  - Nada importante
- 

Pense sobre as razões pelas quais você consome arroz.

O quanto essa afirmação é importante para você "...para compensar"

- Extremamente importante

- Muito importante
  - Moderadamente importante
  - Levemente importante
  - Nada importante
- 

Pense sobre as razões pelas quais você consome arroz.

O quanto essa afirmação é importante para você "...porque não faz parte das tradições como Natal, Ano Novo e ocasiões especiais"

- Extremamente importante
  - Muito importante
  - Moderadamente importante
  - Levemente importante
  - Nada importante
- 

Pense sobre as razões pelas quais você consome arroz.

O quanto essa afirmação é importante para você "...porque faz parte de certas situações"

- Extremamente importante
  - Muito importante
  - Moderadamente importante
  - Levemente importante
  - Nada importante
- 

Pense sobre as razões pelas quais você consome arroz.

O quanto essa afirmação é importante para você "...para manter uma dieta balanceada"

- Extremamente importante
- Muito importante
- Moderadamente importante

- Levemente importante
  - Nada importante
- 

Pense sobre as razões pelas quais você consome arroz.

O quanto essa afirmação é importante para você "...porque é sociável"

- Extremamente importante
  - Muito importante
  - Moderadamente importante
  - Levemente importante
  - Nada importante
- 

Pense sobre as razões pelas quais você consome arroz.

O quanto essa afirmação é importante para você "...porque não é caro"

- Extremamente importante
  - Muito importante
  - Moderadamente importante
  - Levemente importante
  - Nada importante
- 

Pense sobre as razões pelas quais você consome arroz.

O quanto essa afirmação é importante para você "...porque me atraiu aparentemente (por exemplo, cores atraentes)"

- Extremamente importante
  - Muito importante
  - Moderadamente importante
  - Levemente importante
  - Nada importante
-

Pense sobre as razões pelas quais você consome arroz.

O quanto essa afirmação é importante para você "...para não desapontar alguém que está tentando me agradar"

- Extremamente importante
  - Muito importante
  - Moderadamente importante
  - Levemente importante
  - Nada importante
- 

Pense sobre as razões pelas quais você consome arroz.

O quanto essa afirmação é importante para você "...porque é moda"

- Extremamente importante
  - Muito importante
  - Moderadamente importante
  - Levemente importante
  - Nada importante
- 

Pense sobre as razões pelas quais você consome arroz.

O quanto essa afirmação é importante para você "...porque está em promoção"

- Extremamente importante
  - Muito importante
  - Moderadamente importante
  - Levemente importante
  - Nada importante
- 

Pense sobre as razões pelas quais você consome arroz.

O quanto essa afirmação é importante para você "...porque me mantém em forma (por exemplo, vigoroso, dinâmico)"

- Extremamente importante
  - Muito importante
  - Moderadamente importante
  - Levemente importante
  - Nada importante
- 

Pense sobre as razões pelas quais você consome arroz.

O quanto essa afirmação é importante para você "...porque é a única escolha"

- Extremamente importante
  - Muito importante
  - Moderadamente importante
  - Levemente importante
  - Nada importante
- 

Pense sobre as razões pelas quais você consome arroz.

O quanto essa afirmação é importante para você "...porque eu quero comer todos os dias"

- Extremamente importante
  - Muito importante
  - Moderadamente importante
  - Levemente importante
  - Nada importante
- 

Pense sobre as razões pelas quais você não consome arroz.

O quanto essa afirmação é importante para você "...eu não acho que seja um lanche"

- Extremamente importante
- Muito importante
- Moderadamente importante



- Levemente importante
  - Nada importante
- 

Pense sobre as razões pelas quais você não consome arroz.

O quanto essa afirmação é importante para você "...eu não gosto disso"

- Extremamente importante
  - Muito importante
  - Moderadamente importante
  - Levemente importante
  - Nada importante
- 

Pense sobre as razões pelas quais você não consome arroz.

O quanto essa afirmação é importante para você "...normalmente eu não como isso"

- Extremamente importante
  - Muito importante
  - Moderadamente importante
  - Levemente importante
  - Nada importante
- 

Pense sobre as razões pelas quais você não consome arroz.

O quanto essa afirmação é importante para você "...o tamanho da porção não é adequado"

- Extremamente importante
  - Muito importante
  - Moderadamente importante
  - Levemente importante
  - Nada importante
-

Pense sobre as razões pelas quais você não consome arroz.

O quanto essa afirmação é importante para você "...não sustenta o suficiente"

- Extremamente importante
  - Muito importante
  - Moderadamente importante
  - Levemente importante
  - Nada importante
- 

Pense sobre as razões pelas quais você não consome arroz.

O quanto essa afirmação é importante para você "...não é saudável"

- Extremamente importante
  - Muito importante
  - Moderadamente importante
  - Levemente importante
  - Nada importante
- 

Pense sobre as razões pelas quais você não consome arroz.

O quanto essa afirmação é importante para você "...não é conveniente"

- Extremamente importante
  - Muito importante
  - Moderadamente importante
  - Levemente importante
  - Nada importante
- 

Pense sobre as razões pelas quais você não consome arroz.

O quanto essa afirmação é importante para você "...eu não quero me dar ao luxo"

- Extremamente importante
- Muito importante

- Moderadamente importante
  - Levemente importante
  - Nada importante
- 

Pense sobre as razões pelas quais você não consome arroz.

O quanto essa afirmação é importante para você "...não é apropriado para a situação"

- Extremamente importante
  - Muito importante
  - Moderadamente importante
  - Levemente importante
  - Nada importante
- 

Pense sobre as razões pelas quais você não consome arroz.

O quanto essa afirmação é importante para você "...não é um alimento que eu como perto de outras pessoas"

- Extremamente importante
  - Muito importante
  - Moderadamente importante
  - Levemente importante
  - Nada importante
- 

Pense sobre as razões pelas quais você não consome arroz.

O quanto essa afirmação é importante para você "...o preço está muito alto"

- Extremamente importante
- Muito importante
- Moderadamente importante
- Levemente importante
- Nada importante

---

Pense sobre as razões pelas quais você não consome arroz.

O quanto essa afirmação é importante para você "...eu não gosto do jeito que parece"

- Extremamente importante
  - Muito importante
  - Moderadamente importante
  - Levemente importante
  - Nada importante
- 

Pense sobre as razões pelas quais você não consome arroz.

O quanto essa afirmação é importante para você "...muito rico em calorias"

- Extremamente importante
  - Muito importante
  - Moderadamente importante
  - Levemente importante
  - Nada importante
- 

Pense sobre as razões pelas quais você não consome arroz.

O quanto essa afirmação é importante para você "...eu não devo comer isso"

- Extremamente importante
  - Muito importante
  - Moderadamente importante
  - Levemente importante
  - Nada importante
- 

Pense sobre as razões pelas quais você não consome arroz.

O quanto essa afirmação é importante para você "...comer isso me faz parecer antiquado"

- Extremamente importante
  - Muito importante
  - Moderadamente importante
  - Levemente importante
  - Nada importante
- 

Pense sobre as razões pelas quais você não consome arroz.

O quanto essa afirmação é importante para você "...não é nada que eu queira comer agora"

- Extremamente importante
  - Muito importante
  - Moderadamente importante
  - Levemente importante
  - Nada importante
- 

Pense sobre as razões pelas quais você não consome arroz.

O quanto essa afirmação é importante para você "...eu comi recentemente e não quero comer a mesma comida com tanta frequência"

- Extremamente importante
  - Muito importante
  - Moderadamente importante
  - Levemente importante
  - Nada importante
- 

Pense sobre as razões pelas quais você não consome arroz.

O quanto essa afirmação é importante para você "...eu nunca escolheria isso porque eu gosto de comer a mesma comida todos os dias"

- Extremamente importante
  - Muito importante
  - Moderadamente importante
  - Levemente importante
  - Nada importante
- 

Pense sobre as razões pelas quais você não consome arroz.

O quanto essa afirmação é importante para você "...essa comida me faz sentir triste, solitário e frustrado"

- Extremamente importante
  - Muito importante
  - Moderadamente importante
  - Levemente importante
  - Nada importante
- 

Pense sobre as razões pelas quais você não consome arroz.

O quanto essa afirmação é importante para você "...não é orgânico"

- Extremamente importante
  - Muito importante
  - Moderadamente importante
  - Levemente importante
  - Nada importante
- 

## Reasons for Protein foods Choices(Full RATA)

---

Você consome feijão?

- Sim

Não

---

Pense sobre as razões pelas quais você consome feijão.

O quanto essa afirmação é importante para você "...porque estou acostumado a comer isso"

- Extremamente importante
  - Muito importante
  - Moderadamente importante
  - Levemente importante
  - Nada importante
- 

Pense sobre as razões pelas quais você consome feijão.

O quanto essa afirmação é importante para você "...porque é saudável"

- Extremamente importante
  - Muito importante
  - Moderadamente importante
  - Levemente importante
  - Nada importante
- 

Pense sobre as razões pelas quais você consome feijão.

O quanto essa afirmação é importante para você "...porque é rápido de preparar"

- Extremamente importante
  - Muito importante
  - Moderadamente importante
  - Levemente importante
  - Nada importante
- 

Pense sobre as razões pelas quais você consome feijão.

O quanto essa afirmação é importante para você "...porque é saboroso"

- Extremamente importante
  - Muito importante
  - Moderadamente importante
  - Levemente importante
  - Nada importante
- 

Pense sobre as razões pelas quais você consome feijão.

O quanto essa afirmação é importante para você "...porque eu me dou ao luxo"

- Extremamente importante
  - Muito importante
  - Moderadamente importante
  - Levemente importante
  - Nada importante
- 

Pense sobre as razões pelas quais você consome feijão.

O quanto essa afirmação é importante para você "...porque é natural (exemplo, não geneticamente modificado)"

- Extremamente importante
  - Muito importante
  - Moderadamente importante
  - Levemente importante
  - Nada importante
- 

Pense sobre as razões pelas quais você consome feijão.

O quanto essa afirmação é importante para você "...porque eu não quero gastar muito"

- Extremamente importante



- Muito importante
  - Moderadamente importante
  - Levemente importante
  - Nada importante
- 

Pense sobre as razões pelas quais você consome feijão.

O quanto essa afirmação é importante para você "...porque tem baixas calorias"

- Extremamente importante
  - Muito importante
  - Moderadamente importante
  - Levemente importante
  - Nada importante
- 

Pense sobre as razões pelas quais você consome feijão.

O quanto essa afirmação é importante para você "...porque estou frustrado"

- Extremamente importante
  - Muito importante
  - Moderadamente importante
  - Levemente importante
  - Nada importante
- 

Pense sobre as razões pelas quais você consome feijão.

O quanto essa afirmação é importante para você "...porque me faz parecer melhor na frente dos outros "

- Extremamente importante
- Muito importante
- Moderadamente importante
- Levemente importante
- Nada importante

---

Pense sobre as razões pelas quais você consome feijão.

O quanto essa afirmação é importante para você "...porque seria falta de educação não comer "

- Extremamente importante
  - Muito importante
  - Moderadamente importante
  - Levemente importante
  - Nada importante
- 

Pense sobre as razões pelas quais você consome feijão.

O quanto essa afirmação é importante para você "...porque a apresentação é atraente (por exemplo a embalagem)"

- Extremamente importante
  - Muito importante
  - Moderadamente importante
  - Levemente importante
  - Nada importante
- 

Pense sobre as razões pelas quais você consome feijão.

O quanto essa afirmação é importante para você "...porque eu posso desfrutar o momento com outras pessoas"

- Extremamente importante
  - Muito importante
  - Moderadamente importante
  - Levemente importante
  - Nada importante
-

Pense sobre as razões pelas quais você consome feijão.

O quanto essa afirmação é importante para você "...porque é orgânico"

- Extremamente importante
  - Muito importante
  - Moderadamente importante
  - Levemente importante
  - Nada importante
- 

Pense sobre as razões pelas quais você consome feijão.

O quanto essa afirmação é importante para você "...porque eu cresci comendo isso"

- Extremamente importante
  - Muito importante
  - Moderadamente importante
  - Levemente importante
  - Nada importante
- 

Pense sobre as razões pelas quais você consome feijão.

O quanto essa afirmação é importante para você "...porque eu curto"

- Extremamente importante
  - Muito importante
  - Moderadamente importante
  - Levemente importante
  - Nada importante
- 

Pense sobre as razões pelas quais você consome feijão.

O quanto essa afirmação é importante para você "...porque eu estou faminto"

- Extremamente importante

- Muito importante
  - Moderadamente importante
  - Levemente importante
  - Nada importante
- 

Pense sobre as razões pelas quais você consome feijão.

O quanto essa afirmação é importante para você "...porque eu tenho o hábito de comer"

- Extremamente importante
  - Muito importante
  - Moderadamente importante
  - Levemente importante
  - Nada importante
- 

Pense sobre as razões pelas quais você consome feijão.

O quanto essa afirmação é importante para você "...porque eu tenho vontade de comer isso"

- Extremamente importante
  - Muito importante
  - Moderadamente importante
  - Levemente importante
  - Nada importante
- 

Pense sobre as razões pelas quais você consome feijão.

O quanto essa afirmação é importante para você "...porque é fácil preparar"

- Extremamente importante
- Muito importante
- Moderadamente importante
- Levemente importante

Nada importante

---

Pense sobre as razões pelas quais você consome feijão.

O quanto essa afirmação é importante para você "...porque eu estou triste"

- Extremamente importante
  - Muito importante
  - Moderadamente importante
  - Levemente importante
  - Nada importante
- 

Pense sobre as razões pelas quais você consome feijão.

O quanto essa afirmação é importante para você "...porque tem pouca gordura"

- Extremamente importante
  - Muito importante
  - Moderadamente importante
  - Levemente importante
  - Nada importante
- 

Pense sobre as razões pelas quais você consome feijão.

O quanto essa afirmação é importante para você "...porque eu vi propaganda em algum lugar ou vi na TV"

- Extremamente importante
  - Muito importante
  - Moderadamente importante
  - Levemente importante
  - Nada importante
- 

Pense sobre as razões pelas quais você consome feijão.

O quanto essa afirmação é importante para você "...porque deixa as reuniões sociais mais agradáveis"

- Extremamente importante
  - Muito importante
  - Moderadamente importante
  - Levemente importante
  - Nada importante
- 

Pense sobre as razões pelas quais você consome feijão.

O quanto essa afirmação é importante para você "...porque eu devo comer"

- Extremamente importante
  - Muito importante
  - Moderadamente importante
  - Levemente importante
  - Nada importante
- 

Pense sobre as razões pelas quais você consome feijão.

O quanto essa afirmação é importante para você "...porque os outros gostam"

- Extremamente importante
  - Muito importante
  - Moderadamente importante
  - Levemente importante
  - Nada importante
- 

Pense sobre as razões pelas quais você consome feijão.

O quanto essa afirmação é importante para você "...porque eu me sinto sozinho"

- Extremamente importante
- Muito importante

- Moderadamente importante
  - Levemente importante
  - Nada importante
- 

Pense sobre as razões pelas quais você consome feijão.

O quanto essa afirmação é importante para você "...porque eu controlo meu peso"

- Extremamente importante
  - Muito importante
  - Moderadamente importante
  - Levemente importante
  - Nada importante
- 

Pense sobre as razões pelas quais você consome feijão.

O quanto essa afirmação é importante para você "...porque não contém substâncias perigosas (por exemplo, agrotóxicos, poluentes, antibióticos)"

- Extremamente importante
  - Muito importante
  - Moderadamente importante
  - Levemente importante
  - Nada importante
- 

Pense sobre as razões pelas quais você consome feijão.

O quanto essa afirmação é importante para você "...porque é mais conveniente"

- Extremamente importante
- Muito importante
- Moderadamente importante
- Levemente importante
- Nada importante

---

Pense sobre as razões pelas quais você consome feijão.

O quanto essa afirmação é importante para você "...porque eu preciso de energia"

- Extremamente importante
  - Muito importante
  - Moderadamente importante
  - Levemente importante
  - Nada importante
- 

Pense sobre as razões pelas quais você consome feijão.

O quanto essa afirmação é importante para você "...porque me é familiar"

- Extremamente importante
  - Muito importante
  - Moderadamente importante
  - Levemente importante
  - Nada importante
- 

Pense sobre as razões pelas quais você consome feijão.

O quanto essa afirmação é importante para você "...porque eu gosto"

- Extremamente importante
  - Muito importante
  - Moderadamente importante
  - Levemente importante
  - Nada importante
- 

Pense sobre as razões pelas quais você consome feijão.

O quanto essa afirmação é importante para você "...porque me sacia de forma agradável"

- Extremamente importante



- Muito importante
  - Moderadamente importante
  - Levemente importante
  - Nada importante
- 

Pense sobre as razões pelas quais você consome feijão.

O quanto essa afirmação é importante para você "...para compensar"

- Extremamente importante
  - Muito importante
  - Moderadamente importante
  - Levemente importante
  - Nada importante
- 

Pense sobre as razões pelas quais você consome feijão.

O quanto essa afirmação é importante para você "...porque não faz parte das tradições como Natal, Ano Novo e ocasiões especiais"

- Extremamente importante
  - Muito importante
  - Moderadamente importante
  - Levemente importante
  - Nada importante
- 

Pense sobre as razões pelas quais você consome feijão.

O quanto essa afirmação é importante para você "...porque faz parte de certas situações"

- Extremamente importante
- Muito importante
- Moderadamente importante
- Levemente importante

Nada importante

---

Pense sobre as razões pelas quais você consome feijão.

O quanto essa afirmação é importante para você "...para manter uma dieta balanceada"

- Extremamente importante
  - Muito importante
  - Moderadamente importante
  - Levemente importante
  - Nada importante
- 

Pense sobre as razões pelas quais você consome feijão.

O quanto essa afirmação é importante para você "...porque é sociável"

- Extremamente importante
  - Muito importante
  - Moderadamente importante
  - Levemente importante
  - Nada importante
- 

Pense sobre as razões pelas quais você consome feijão.

O quanto essa afirmação é importante para você "...porque não é caro"

- Extremamente importante
  - Muito importante
  - Moderadamente importante
  - Levemente importante
  - Nada importante
- 

Pense sobre as razões pelas quais você consome feijão.

O quanto essa afirmação é importante para você "...porque me atraiu aparentemente (por exemplo, cores atraentes)"

- Extremamente importante
  - Muito importante
  - Moderadamente importante
  - Levemente importante
  - Nada importante
- 

Pense sobre as razões pelas quais você consome feijão.

O quanto essa afirmação é importante para você "...para não desapontar alguém que está tentando me agradar"

- Extremamente importante
  - Muito importante
  - Moderadamente importante
  - Levemente importante
  - Nada importante
- 

Pense sobre as razões pelas quais você consome feijão.

O quanto essa afirmação é importante para você "...porque é moda"

- Extremamente importante
  - Muito importante
  - Moderadamente importante
  - Levemente importante
  - Nada importante
- 

Pense sobre as razões pelas quais você consome feijão.

O quanto essa afirmação é importante para você "...porque está em promoção"

- Extremamente importante

- Muito importante
  - Moderadamente importante
  - Levemente importante
  - Nada importante
- 

Pense sobre as razões pelas quais você consome feijão.

O quanto essa afirmação é importante para você "...porque me mantém em forma (por exemplo, vigoroso, dinâmico)"

- Extremamente importante
  - Muito importante
  - Moderadamente importante
  - Levemente importante
  - Nada importante
- 

Pense sobre as razões pelas quais você consome feijão.

O quanto essa afirmação é importante para você "...porque é a única escolha"

- Extremamente importante
  - Muito importante
  - Moderadamente importante
  - Levemente importante
  - Nada importante
- 

Pense sobre as razões pelas quais você consome feijão.

O quanto essa afirmação é importante para você "...porque eu quero comer todos os dias"

- Extremamente importante
- Muito importante
- Moderadamente importante
- Levemente importante

Nada importante

---

Pense sobre as razões pelas quais você não consome feijão.

O quanto essa afirmação é importante para você "...eu não acho que seja um lanche"

- Extremamente importante
  - Muito importante
  - Moderadamente importante
  - Levemente importante
  - Nada importante
- 

Pense sobre as razões pelas quais você não consome feijão.

O quanto essa afirmação é importante para você "...eu não gosto disso"

- Extremamente importante
  - Muito importante
  - Moderadamente importante
  - Levemente importante
  - Nada importante
- 

Pense sobre as razões pelas quais você não consome feijão.

O quanto essa afirmação é importante para você "...normalmente eu não como isso"

- Extremamente importante
  - Muito importante
  - Moderadamente importante
  - Levemente importante
  - Nada importante
-

Pense sobre as razões pelas quais você não consome feijão.

O quanto essa afirmação é importante para você "...o tamanho da porção não é adequado"

- Extremamente importante
  - Muito importante
  - Moderadamente importante
  - Levemente importante
  - Nada importante
- 

Pense sobre as razões pelas quais você não consome feijão.

O quanto essa afirmação é importante para você "...não sustenta o suficiente"

- Extremamente importante
  - Muito importante
  - Moderadamente importante
  - Levemente importante
  - Nada importante
- 

Pense sobre as razões pelas quais você não consome feijão.

O quanto essa afirmação é importante para você "...não é saudável"

- Extremamente importante
  - Muito importante
  - Moderadamente importante
  - Levemente importante
  - Nada importante
- 

Pense sobre as razões pelas quais você não consome feijão.

O quanto essa afirmação é importante para você "...não é conveniente"

- Extremamente importante

- Muito importante
  - Moderadamente importante
  - Levemente importante
  - Nada importante
- 

Pense sobre as razões pelas quais você não consome feijão.

O quanto essa afirmação é importante para você "...eu não quero me dar ao luxo"

- Extremamente importante
  - Muito importante
  - Moderadamente importante
  - Levemente importante
  - Nada importante
- 

Pense sobre as razões pelas quais você não consome feijão.

O quanto essa afirmação é importante para você "...não é apropriado para a situação"

- Extremamente importante
  - Muito importante
  - Moderadamente importante
  - Levemente importante
  - Nada importante
- 

Pense sobre as razões pelas quais você não consome feijão.

O quanto essa afirmação é importante para você "...não é um alimento que eu como perto de outras pessoas"

- Extremamente importante
- Muito importante
- Moderadamente importante
- Levemente importante

Nada importante

---

Pense sobre as razões pelas quais você não consome feijão.

O quanto essa afirmação é importante para você "...o preço está muito alto"

- Extremamente importante
  - Muito importante
  - Moderadamente importante
  - Levemente importante
  - Nada importante
- 

Pense sobre as razões pelas quais você não consome feijão.

O quanto essa afirmação é importante para você "...eu não gosto do jeito que parece"

- Extremamente importante
  - Muito importante
  - Moderadamente importante
  - Levemente importante
  - Nada importante
- 

Pense sobre as razões pelas quais você não consome feijão.

O quanto essa afirmação é importante para você "...muito rico em calorias"

- Extremamente importante
  - Muito importante
  - Moderadamente importante
  - Levemente importante
  - Nada importante
- 

Pense sobre as razões pelas quais você não consome feijão.



O quanto essa afirmação é importante para você "...eu não devo comer isso"

- Extremamente importante
  - Muito importante
  - Moderadamente importante
  - Levemente importante
  - Nada importante
- 

Pense sobre as razões pelas quais você não consome feijão.

O quanto essa afirmação é importante para você "...comer isso me faz parecer antiquado"

- Extremamente importante
  - Muito importante
  - Moderadamente importante
  - Levemente importante
  - Nada importante
- 

Pense sobre as razões pelas quais você não consome feijão.

O quanto essa afirmação é importante para você "...não é nada que eu queira comer agora"

- Extremamente importante
  - Muito importante
  - Moderadamente importante
  - Levemente importante
  - Nada importante
- 

Pense sobre as razões pelas quais você não consome feijão.

O quanto essa afirmação é importante para você "...eu comi recentemente e não quero comer a mesma comida com tanta frequência"

- Extremamente importante
  - Muito importante
  - Moderadamente importante
  - Levemente importante
  - Nada importante
- 

Pense sobre as razões pelas quais você não consome feijão.

O quanto essa afirmação é importante para você "...eu nunca escolheria isso porque eu gosto de comer a mesma comida todos os dias"

- Extremamente importante
  - Muito importante
  - Moderadamente importante
  - Levemente importante
  - Nada importante
- 

Pense sobre as razões pelas quais você não consome feijão.

O quanto essa afirmação é importante para você "...essa comida me faz sentir triste, solitário e frustrado"

- Extremamente importante
  - Muito importante
  - Moderadamente importante
  - Levemente importante
  - Nada importante
- 

Pense sobre as razões pelas quais você não consome feijão.

O quanto essa afirmação é importante para você "...não é orgânico"

- Extremamente importante
- Muito importante
- Moderadamente importante

- Levemente importante
  - Nada importante
- 

## Reasons for Dairy Food Choices(Full RATA)

---

Você consome leite?

- Sim
  - Não
- 

Pense sobre as razões pelas quais você consome leite.

O quanto essa afirmação é importante para você "...porque estou a acostumado a comer isso"

- Extremamente importante
  - Muito importante
  - Moderadamente importante
  - Levemente importante
  - Nada importante
- 

Pense sobre as razões pelas quais você consome leite.

O quanto essa afirmação é importante para você "...porque é saudável"

- Extremamente importante
  - Muito importante
  - Moderadamente importante
  - Levemente importante
  - Nada importante
- 

Pense sobre as razões pelas quais você consome leite.

O quanto essa afirmação é importante para você "...porque é rápido de preparar"

- Extremamente importante
  - Muito importante
  - Moderadamente importante
  - Levemente importante
  - Nada importante
- 

Pense sobre as razões pelas quais você consome leite.

O quanto essa afirmação é importante para você "...porque é saboroso"

- Extremamente importante
  - Muito importante
  - Moderadamente importante
  - Levemente importante
  - Nada importante
- 

Pense sobre as razões pelas quais você consome leite.

O quanto essa afirmação é importante para você "...porque eu me dou ao luxo"

- Extremamente importante
  - Muito importante
  - Moderadamente importante
  - Levemente importante
  - Nada importante
- 

Pense sobre as razões pelas quais você consome leite.

O quanto essa afirmação é importante para você "...porque é natural (exemplo, não geneticamente modificado)"

- Extremamente importante
- Muito importante

- Moderadamente importante
  - Levemente importante
  - Nada importante
- 

Pense sobre as razões pelas quais você consome leite.

O quanto essa afirmação é importante para você "...porque eu não quero gastar muito"

- Extremamente importante
  - Muito importante
  - Moderadamente importante
  - Levemente importante
  - Nada importante
- 

Pense sobre as razões pelas quais você consome leite.

O quanto essa afirmação é importante para você "...porque tem baixas calorias"

- Extremamente importante
  - Muito importante
  - Moderadamente importante
  - Levemente importante
  - Nada importante
- 

Pense sobre as razões pelas quais você consome leite.

O quanto essa afirmação é importante para você "...porque estou frustrado"

- Extremamente importante
- Muito importante
- Moderadamente importante
- Levemente importante
- Nada importante

---

Pense sobre as razões pelas quais você consome leite.

O quanto essa afirmação é importante para você "...porque me faz parecer melhor na frente dos outros "

- Extremamente importante
  - Muito importante
  - Moderadamente importante
  - Levemente importante
  - Nada importante
- 

Pense sobre as razões pelas quais você consome leite.

O quanto essa afirmação é importante para você "...porque seria falta de educação não comer "

- Extremamente importante
  - Muito importante
  - Moderadamente importante
  - Levemente importante
  - Nada importante
- 

Pense sobre as razões pelas quais você consome leite.

O quanto essa afirmação é importante para você "...porque a apresentação é atraente (por exemplo a embalagem)"

- Extremamente importante
  - Muito importante
  - Moderadamente importante
  - Levemente importante
  - Nada importante
- 

Pense sobre as razões pelas quais você consome leite.

O quanto essa afirmação é importante para você "...porque eu posso desfrutar o momento com outras pessoas"

- Extremamente importante
  - Muito importante
  - Moderadamente importante
  - Levemente importante
  - Nada importante
- 

Pense sobre as razões pelas quais você consome leite.

O quanto essa afirmação é importante para você "...porque é orgânico"

- Extremamente importante
  - Muito importante
  - Moderadamente importante
  - Levemente importante
  - Nada importante
- 

Pense sobre as razões pelas quais você consome leite.

O quanto essa afirmação é importante para você "...porque eu cresci comendo isso"

- Extremamente importante
  - Muito importante
  - Moderadamente importante
  - Levemente importante
  - Nada importante
- 

Pense sobre as razões pelas quais você consome leite.

O quanto essa afirmação é importante para você "...porque eu curto"

- Extremamente importante

- Muito importante
  - Moderadamente importante
  - Levemente importante
  - Nada importante
- 

Pense sobre as razões pelas quais você consome leite.

O quanto essa afirmação é importante para você "...porque eu estou faminto"

- Extremamente importante
  - Muito importante
  - Moderadamente importante
  - Levemente importante
  - Nada importante
- 

Pense sobre as razões pelas quais você consome leite.

O quanto essa afirmação é importante para você "...porque eu tenho o hábito de comer"

- Extremamente importante
  - Muito importante
  - Moderadamente importante
  - Levemente importante
  - Nada importante
- 

Pense sobre as razões pelas quais você consome leite.

O quanto essa afirmação é importante para você "...porque eu tenho vontade de comer isso"

- Extremamente importante
- Muito importante
- Moderadamente importante
- Levemente importante



Nada importante

---

Pense sobre as razões pelas quais você consome leite.

O quanto essa afirmação é importante para você "...porque é fácil preparar"

- Extremamente importante
  - Muito importante
  - Moderadamente importante
  - Levemente importante
  - Nada importante
- 

Pense sobre as razões pelas quais você consome leite.

O quanto essa afirmação é importante para você "...porque eu estou triste"

- Extremamente importante
  - Muito importante
  - Moderadamente importante
  - Levemente importante
  - Nada importante
- 

Pense sobre as razões pelas quais você consome leite.

O quanto essa afirmação é importante para você "...porque tem pouca gordura"

- Extremamente importante
  - Muito importante
  - Moderadamente importante
  - Levemente importante
  - Nada importante
- 

Pense sobre as razões pelas quais você consome leite.

O quanto essa afirmação é importante para você "...porque eu vi propaganda em algum lugar ou vi na TV"

- Extremamente importante
  - Muito importante
  - Moderadamente importante
  - Levemente importante
  - Nada importante
- 

Pense sobre as razões pelas quais você consome leite.

O quanto essa afirmação é importante para você "...porque deixa as reuniões sociais mais agradáveis"

- Extremamente importante
  - Muito importante
  - Moderadamente importante
  - Levemente importante
  - Nada importante
- 

Pense sobre as razões pelas quais você consome leite.

O quanto essa afirmação é importante para você "...porque eu devo comer"

- Extremamente importante
  - Muito importante
  - Moderadamente importante
  - Levemente importante
  - Nada importante
- 

Pense sobre as razões pelas quais você consome leite.

O quanto essa afirmação é importante para você "...porque os outros gostam"

- Extremamente importante

- Muito importante
  - Moderadamente importante
  - Levemente importante
  - Nada importante
- 

Pense sobre as razões pelas quais você consome leite.

O quanto essa afirmação é importante para você "...porque eu me sinto sozinho"

- Extremamente importante
  - Muito importante
  - Moderadamente importante
  - Levemente importante
  - Nada importante
- 

Pense sobre as razões pelas quais você consome leite.

O quanto essa afirmação é importante para você "...porque eu controlo meu peso"

- Extremamente importante
  - Muito importante
  - Moderadamente importante
  - Levemente importante
  - Nada importante
- 

Pense sobre as razões pelas quais você consome leite.

O quanto essa afirmação é importante para você "...porque não contém substâncias perigosas (por exemplo, agrotóxicos, poluentes, antibióticos)"

- Extremamente importante
- Muito importante
- Moderadamente importante
- Levemente importante
- Nada importante

---

Pense sobre as razões pelas quais você consome leite.

O quanto essa afirmação é importante para você "...porque é mais conveniente"

- Extremamente importante
  - Muito importante
  - Moderadamente importante
  - Levemente importante
  - Nada importante
- 

Pense sobre as razões pelas quais você consome leite.

O quanto essa afirmação é importante para você "...porque eu preciso de energia"

- Extremamente importante
  - Muito importante
  - Moderadamente importante
  - Levemente importante
  - Nada importante
- 

Pense sobre as razões pelas quais você consome leite.

O quanto essa afirmação é importante para você "...porque me é familiar"

- Extremamente importante
  - Muito importante
  - Moderadamente importante
  - Levemente importante
  - Nada importante
- 

Pense sobre as razões pelas quais você consome leite.

O quanto essa afirmação é importante para você "...porque eu gosto"

- Extremamente importante
  - Muito importante
  - Moderadamente importante
  - Levemente importante
  - Nada importante
- 

Pense sobre as razões pelas quais você consome leite.

O quanto essa afirmação é importante para você "...porque me sacia de forma agradável"

- Extremamente importante
  - Muito importante
  - Moderadamente importante
  - Levemente importante
  - Nada importante
- 

Pense sobre as razões pelas quais você consome leite.

O quanto essa afirmação é importante para você "...para compensar"

- Extremamente importante
  - Muito importante
  - Moderadamente importante
  - Levemente importante
  - Nada importante
- 

Pense sobre as razões pelas quais você consome leite.

O quanto essa afirmação é importante para você "...porque não faz parte das tradições como Natal, Ano Novo e ocasiões especiais"

- Extremamente importante
- Muito importante
- Moderadamente importante

- Levemente importante
  - Nada importante
- 

Pense sobre as razões pelas quais você consome leite.

O quanto essa afirmação é importante para você "...porque faz parte de certas situações"

- Extremamente importante
  - Muito importante
  - Moderadamente importante
  - Levemente importante
  - Nada importante
- 

Pense sobre as razões pelas quais você consome leite.

O quanto essa afirmação é importante para você "...para manter uma dieta balanceada"

- Extremamente importante
  - Muito importante
  - Moderadamente importante
  - Levemente importante
  - Nada importante
- 

Pense sobre as razões pelas quais você consome leite.

O quanto essa afirmação é importante para você "...porque é sociável"

- Extremamente importante
  - Muito importante
  - Moderadamente importante
  - Levemente importante
  - Nada importante
-

Pense sobre as razões pelas quais você consome leite.

O quanto essa afirmação é importante para você "...porque não é caro"

- Extremamente importante
  - Muito importante
  - Moderadamente importante
  - Levemente importante
  - Nada importante
- 

Pense sobre as razões pelas quais você consome leite.

O quanto essa afirmação é importante para você "...porque me atraiu aparentemente (por exemplo, cores atraentes)"

- Extremamente importante
  - Muito importante
  - Moderadamente importante
  - Levemente importante
  - Nada importante
- 

Pense sobre as razões pelas quais você consome leite.

O quanto essa afirmação é importante para você "...para não desapontar alguém que está tentando me agradar"

- Extremamente importante
  - Muito importante
  - Moderadamente importante
  - Levemente importante
  - Nada importante
- 

Pense sobre as razões pelas quais você consome leite.

O quanto essa afirmação é importante para você "...porque é moda"

- Extremamente importante
  - Muito importante
  - Moderadamente importante
  - Levemente importante
  - Nada importante
- 

Pense sobre as razões pelas quais você consome leite.

O quanto essa afirmação é importante para você "...porque está em promoção"

- Extremamente importante
  - Muito importante
  - Moderadamente importante
  - Levemente importante
  - Nada importante
- 

Pense sobre as razões pelas quais você consome leite.

O quanto essa afirmação é importante para você "...porque me mantém em forma (por exemplo, vigoroso, dinâmico)"

- Extremamente importante
  - Muito importante
  - Moderadamente importante
  - Levemente importante
  - Nada importante
- 

Pense sobre as razões pelas quais você consome leite.

O quanto essa afirmação é importante para você "...porque é a única escolha"

- Extremamente importante
- Muito importante
- Moderadamente importante
- Levemente importante



Nada importante

---

Pense sobre as razões pelas quais você consome leite.

O quanto essa afirmação é importante para você "...porque eu quero comer todos os dias"

- Extremamente importante
  - Muito importante
  - Moderadamente importante
  - Levemente importante
  - Nada importante
- 

Pense sobre as razões pelas quais você não consome leite.

O quanto essa afirmação é importante para você "...eu não acho que seja um lanche"

- Extremamente importante
  - Muito importante
  - Moderadamente importante
  - Levemente importante
  - Nada importante
- 

Pense sobre as razões pelas quais você não consome leite.

O quanto essa afirmação é importante para você "...eu não gosto disso"

- Extremamente importante
  - Muito importante
  - Moderadamente importante
  - Levemente importante
  - Nada importante
-

Pense sobre as razões pelas quais você não consome leite.

O quanto essa afirmação é importante para você "...normalmente eu não como isso"

- Extremamente importante
  - Muito importante
  - Moderadamente importante
  - Levemente importante
  - Nada importante
- 

Pense sobre as razões pelas quais você não consome leite.

O quanto essa afirmação é importante para você "...o tamanho da porção não é adequado"

- Extremamente importante
  - Muito importante
  - Moderadamente importante
  - Levemente importante
  - Nada importante
- 

Pense sobre as razões pelas quais você não consome leite.

O quanto essa afirmação é importante para você "...não sustenta o suficiente"

- Extremamente importante
  - Muito importante
  - Moderadamente importante
  - Levemente importante
  - Nada importante
- 

Pense sobre as razões pelas quais você não consome leite.

O quanto essa afirmação é importante para você "...não é saudável"

- Extremamente importante
  - Muito importante
  - Moderadamente importante
  - Levemente importante
  - Nada importante
- 

Pense sobre as razões pelas quais você não consome leite.

O quanto essa afirmação é importante para você "...não é conveniente"

- Extremamente importante
  - Muito importante
  - Moderadamente importante
  - Levemente importante
  - Nada importante
- 

Pense sobre as razões pelas quais você não consome leite.

O quanto essa afirmação é importante para você "...eu não quero me dar ao luxo"

- Extremamente importante
  - Muito importante
  - Moderadamente importante
  - Levemente importante
  - Nada importante
- 

Pense sobre as razões pelas quais você não consome leite.

O quanto essa afirmação é importante para você "...não é apropriado para a situação"

- Extremamente importante
- Muito importante
- Moderadamente importante
- Levemente importante

Nada importante

---

Pense sobre as razões pelas quais você não consome leite.

O quanto essa afirmação é importante para você "...não é um alimento que eu como perto de outras pessoas"

- Extremamente importante
  - Muito importante
  - Moderadamente importante
  - Levemente importante
  - Nada importante
- 

Pense sobre as razões pelas quais você não consome leite.

O quanto essa afirmação é importante para você "...o preço está muito alto"

- Extremamente importante
  - Muito importante
  - Moderadamente importante
  - Levemente importante
  - Nada importante
- 

Pense sobre as razões pelas quais você não consome leite.

O quanto essa afirmação é importante para você "...eu não gosto do jeito que parece"

- Extremamente importante
  - Muito importante
  - Moderadamente importante
  - Levemente importante
  - Nada importante
-

Pense sobre as razões pelas quais você não consome leite.

O quanto essa afirmação é importante para você "...muito rico em calorias"

- Extremamente importante
  - Muito importante
  - Moderadamente importante
  - Levemente importante
  - Nada importante
- 

Pense sobre as razões pelas quais você não consome leite.

O quanto essa afirmação é importante para você "...eu não devo comer isso"

- Extremamente importante
  - Muito importante
  - Moderadamente importante
  - Levemente importante
  - Nada importante
- 

Pense sobre as razões pelas quais você não consome leite.

O quanto essa afirmação é importante para você "...comer isso me faz parecer antiquado"

- Extremamente importante
  - Muito importante
  - Moderadamente importante
  - Levemente importante
  - Nada importante
- 

Pense sobre as razões pelas quais você não consome leite.

O quanto essa afirmação é importante para você "...não é nada que eu queira comer agora"

- Extremamente importante
  - Muito importante
  - Moderadamente importante
  - Levemente importante
  - Nada importante
- 

Pense sobre as razões pelas quais você não consome leite.

O quanto essa afirmação é importante para você "...eu comi recentemente e não quero comer a mesma comida com tanta frequência"

- Extremamente importante
  - Muito importante
  - Moderadamente importante
  - Levemente importante
  - Nada importante
- 

Pense sobre as razões pelas quais você não consome leite.

O quanto essa afirmação é importante para você "...eu nunca escolheria isso porque eu gosto de comer a mesma comida todos os dias"

- Extremamente importante
  - Muito importante
  - Moderadamente importante
  - Levemente importante
  - Nada importante
- 

Pense sobre as razões pelas quais você não consome leite.

O quanto essa afirmação é importante para você "...essa comida me faz sentir triste, solitário e frustrado"

- Extremamente importante
- Muito importante

- Moderadamente importante
  - Levemente importante
  - Nada importante
- 

Pense sobre as razões pelas quais você não consome leite.

O quanto essa afirmação é importante para você "...não é orgânico"

- Extremamente importante
  - Muito importante
  - Moderadamente importante
  - Levemente importante
  - Nada importante
- 

### Reasons for Fruit Choices(Full RATA)

---

Você consome banana?

- Sim
  - Não
- 

Pense sobre as razões pelas quais você consome banana.

O quanto essa afirmação é importante para você "...porque estou a acostumado a comer isso"

- Extremamente importante
  - Muito importante
  - Moderadamente importante
  - Levemente importante
  - Nada importante
-

Pense sobre as razões pelas quais você consome banana.

O quanto essa afirmação é importante para você "...porque é saudável"

- Extremamente importante
  - Muito importante
  - Moderadamente importante
  - Levemente importante
  - Nada importante
- 

Pense sobre as razões pelas quais você consome banana.

O quanto essa afirmação é importante para você "...porque é rápido de preparar"

- Extremamente importante
  - Muito importante
  - Moderadamente importante
  - Levemente importante
  - Nada importante
- 

Pense sobre as razões pelas quais você consome banana.

O quanto essa afirmação é importante para você "...porque é saboroso"

- Extremamente importante
  - Muito importante
  - Moderadamente importante
  - Levemente importante
  - Nada importante
- 

Pense sobre as razões pelas quais você consome banana.

O quanto essa afirmação é importante para você "...porque eu me dou ao luxo"

- Extremamente importante
- Muito importante



- Moderadamente importante
  - Levemente importante
  - Nada importante
- 

Pense sobre as razões pelas quais você consome banana.

O quanto essa afirmação é importante para você "...porque é natural (exemplo, não geneticamente modificado)"

- Extremamente importante
  - Muito importante
  - Moderadamente importante
  - Levemente importante
  - Nada importante
- 

Pense sobre as razões pelas quais você consome banana.

O quanto essa afirmação é importante para você "...porque eu não quero gastar muito"

- Extremamente importante
  - Muito importante
  - Moderadamente importante
  - Levemente importante
  - Nada importante
- 

Pense sobre as razões pelas quais você consome banana.

O quanto essa afirmação é importante para você "...porque tem baixas calorias"

- Extremamente importante
- Muito importante
- Moderadamente importante
- Levemente importante
- Nada importante

---

Pense sobre as razões pelas quais você consome banana.

O quanto essa afirmação é importante para você "...porque estou frustrado"

- Extremamente importante
  - Muito importante
  - Moderadamente importante
  - Levemente importante
  - Nada importante
- 

Pense sobre as razões pelas quais você consome banana.

O quanto essa afirmação é importante para você "...porque me faz parecer melhor na frente dos outros "

- Extremamente importante
  - Muito importante
  - Moderadamente importante
  - Levemente importante
  - Nada importante
- 

Pense sobre as razões pelas quais você consome banana.

O quanto essa afirmação é importante para você "...porque seria falta de educação não comer "

- Extremamente importante
  - Muito importante
  - Moderadamente importante
  - Levemente importante
  - Nada importante
- 

Pense sobre as razões pelas quais você consome banana.

O quanto essa afirmação é importante para você "...porque a apresentação é atraente (por exemplo a embalagem)"

- Extremamente importante
  - Muito importante
  - Moderadamente importante
  - Levemente importante
  - Nada importante
- 

Pense sobre as razões pelas quais você consome banana.

O quanto essa afirmação é importante para você "...porque eu posso desfrutar o momento com outras pessoas"

- Extremamente importante
  - Muito importante
  - Moderadamente importante
  - Levemente importante
  - Nada importante
- 

Pense sobre as razões pelas quais você consome banana.

O quanto essa afirmação é importante para você "...porque é orgânico"

- Extremamente importante
  - Muito importante
  - Moderadamente importante
  - Levemente importante
  - Nada importante
- 

Pense sobre as razões pelas quais você consome banana.

O quanto essa afirmação é importante para você "...porque eu cresci comendo isso"

- Extremamente importante
  - Muito importante
  - Moderadamente importante
  - Levemente importante
  - Nada importante
- 

Pense sobre as razões pelas quais você consome banana.

O quanto essa afirmação é importante para você "...porque eu curto"

- Extremamente importante
  - Muito importante
  - Moderadamente importante
  - Levemente importante
  - Nada importante
- 

Pense sobre as razões pelas quais você consome banana.

O quanto essa afirmação é importante para você "...porque eu estou faminto"

- Extremamente importante
  - Muito importante
  - Moderadamente importante
  - Levemente importante
  - Nada importante
- 

Pense sobre as razões pelas quais você consome banana.

O quanto essa afirmação é importante para você "...porque eu tenho o hábito de comer"

- Extremamente importante
- Muito importante
- Moderadamente importante
- Levemente importante

Nada importante

---

Pense sobre as razões pelas quais você consome banana.

O quanto essa afirmação é importante para você "...porque eu tenho vontade de comer isso"

- Extremamente importante
  - Muito importante
  - Moderadamente importante
  - Levemente importante
  - Nada importante
- 

Pense sobre as razões pelas quais você consome banana.

O quanto essa afirmação é importante para você "...porque é fácil preparar"

- Extremamente importante
  - Muito importante
  - Moderadamente importante
  - Levemente importante
  - Nada importante
- 

Pense sobre as razões pelas quais você consome banana.

O quanto essa afirmação é importante para você "...porque eu estou triste"

- Extremamente importante
  - Muito importante
  - Moderadamente importante
  - Levemente importante
  - Nada importante
- 

Pense sobre as razões pelas quais você consome banana.

O quanto essa afirmação é importante para você "...porque tem pouca gordura"

- Extremamente importante
  - Muito importante
  - Moderadamente importante
  - Levemente importante
  - Nada importante
- 

Pense sobre as razões pelas quais você consome banana.

O quanto essa afirmação é importante para você "...porque eu vi propaganda em algum lugar ou vi na TV"

- Extremamente importante
  - Muito importante
  - Moderadamente importante
  - Levemente importante
  - Nada importante
- 

Pense sobre as razões pelas quais você consome banana.

O quanto essa afirmação é importante para você "...porque deixa as reuniões sociais mais agradáveis"

- Extremamente importante
  - Muito importante
  - Moderadamente importante
  - Levemente importante
  - Nada importante
- 

Pense sobre as razões pelas quais você consome banana.

O quanto essa afirmação é importante para você "...porque eu devo comer"

- Extremamente importante

- Muito importante
  - Moderadamente importante
  - Levemente importante
  - Nada importante
- 

Pense sobre as razões pelas quais você consome banana.

O quanto essa afirmação é importante para você "...porque os outros gostam"

- Extremamente importante
  - Muito importante
  - Moderadamente importante
  - Levemente importante
  - Nada importante
- 

Pense sobre as razões pelas quais você consome banana.

O quanto essa afirmação é importante para você "...porque eu me sinto sozinho"

- Extremamente importante
  - Muito importante
  - Moderadamente importante
  - Levemente importante
  - Nada importante
- 

Pense sobre as razões pelas quais você consome banana.

O quanto essa afirmação é importante para você "...porque eu controlo meu peso"

- Extremamente importante
- Muito importante
- Moderadamente importante
- Levemente importante
- Nada importante

---

Pense sobre as razões pelas quais você consome banana.

O quanto essa afirmação é importante para você "...porque não contém substâncias perigosas (por exemplo, agrotóxicos, poluentes, antibióticos)"

- Extremamente importante
  - Muito importante
  - Moderadamente importante
  - Levemente importante
  - Nada importante
- 

Pense sobre as razões pelas quais você consome banana.

O quanto essa afirmação é importante para você "...porque é mais conveniente"

- Extremamente importante
  - Muito importante
  - Moderadamente importante
  - Levemente importante
  - Nada importante
- 

Pense sobre as razões pelas quais você consome banana.

O quanto essa afirmação é importante para você "...porque eu preciso de energia"

- Extremamente importante
  - Muito importante
  - Moderadamente importante
  - Levemente importante
  - Nada importante
- 

Pense sobre as razões pelas quais você consome banana.

O quanto essa afirmação é importante para você "...porque me é familiar"

- Extremamente importante



- Muito importante
  - Moderadamente importante
  - Levemente importante
  - Nada importante
- 

Pense sobre as razões pelas quais você consome banana.

O quanto essa afirmação é importante para você "...porque eu gosto"

- Extremamente importante
  - Muito importante
  - Moderadamente importante
  - Levemente importante
  - Nada importante
- 

Pense sobre as razões pelas quais você consome banana.

O quanto essa afirmação é importante para você "...porque me sacia de forma agradável"

- Extremamente importante
  - Muito importante
  - Moderadamente importante
  - Levemente importante
  - Nada importante
- 

Pense sobre as razões pelas quais você consome banana.

O quanto essa afirmação é importante para você "...para compensar"

- Extremamente importante
- Muito importante
- Moderadamente importante
- Levemente importante
- Nada importante

---

Pense sobre as razões pelas quais você consome banana.

O quanto essa afirmação é importante para você "...porque não faz parte das tradições como Natal, Ano Novo e ocasiões especiais"

- Extremamente importante
  - Muito importante
  - Moderadamente importante
  - Levemente importante
  - Nada importante
- 

Pense sobre as razões pelas quais você consome banana.

O quanto essa afirmação é importante para você "...porque faz parte de certas situações"

- Extremamente importante
  - Muito importante
  - Moderadamente importante
  - Levemente importante
  - Nada importante
- 

Pense sobre as razões pelas quais você consome banana.

O quanto essa afirmação é importante para você "...para manter uma dieta balanceada"

- Extremamente importante
  - Muito importante
  - Moderadamente importante
  - Levemente importante
  - Nada importante
-

Pense sobre as razões pelas quais você consome banana.

O quanto essa afirmação é importante para você "...porque é sociável"

- Extremamente importante
  - Muito importante
  - Moderadamente importante
  - Levemente importante
  - Nada importante
- 

Pense sobre as razões pelas quais você consome banana.

O quanto essa afirmação é importante para você "...porque não é caro"

- Extremamente importante
  - Muito importante
  - Moderadamente importante
  - Levemente importante
  - Nada importante
- 

Pense sobre as razões pelas quais você consome banana.

O quanto essa afirmação é importante para você "...porque me atraiu aparentemente (por exemplo, cores atraentes)"

- Extremamente importante
  - Muito importante
  - Moderadamente importante
  - Levemente importante
  - Nada importante
- 

Pense sobre as razões pelas quais você consome banana.

O quanto essa afirmação é importante para você "...para não desapontar alguém que está tentando me agradar"

- Extremamente importante
  - Muito importante
  - Moderadamente importante
  - Levemente importante
  - Nada importante
- 

Pense sobre as razões pelas quais você consome banana.

O quanto essa afirmação é importante para você "...porque é moda"

- Extremamente importante
  - Muito importante
  - Moderadamente importante
  - Levemente importante
  - Nada importante
- 

Pense sobre as razões pelas quais você consome banana.

O quanto essa afirmação é importante para você "...porque está em promoção"

- Extremamente importante
  - Muito importante
  - Moderadamente importante
  - Levemente importante
  - Nada importante
- 

Pense sobre as razões pelas quais você consome banana.

O quanto essa afirmação é importante para você "...porque me mantém em forma (por exemplo, vigoroso, dinâmico)"

- Extremamente importante
- Muito importante
- Moderadamente importante
- Levemente importante

Nada importante

---

Pense sobre as razões pelas quais você consome banana.

O quanto essa afirmação é importante para você "...porque é a única escolha"

- Extremamente importante
  - Muito importante
  - Moderadamente importante
  - Levemente importante
  - Nada importante
- 

Pense sobre as razões pelas quais você consome banana.

O quanto essa afirmação é importante para você "...porque eu quero comer todos os dias"

- Extremamente importante
  - Muito importante
  - Moderadamente importante
  - Levemente importante
  - Nada importante
- 

Pense sobre as razões pelas quais você não consome banana.

O quanto essa afirmação é importante para você "...eu não acho que seja um lanche"

- Extremamente importante
  - Muito importante
  - Moderadamente importante
  - Levemente importante
  - Nada importante
-

Pense sobre as razões pelas quais você não consome banana.

O quanto essa afirmação é importante para você "...eu não gosto disso"

- Extremamente importante
  - Muito importante
  - Moderadamente importante
  - Levemente importante
  - Nada importante
- 

Pense sobre as razões pelas quais você não consome banana.

O quanto essa afirmação é importante para você "...normalmente eu não como isso"

- Extremamente importante
  - Muito importante
  - Moderadamente importante
  - Levemente importante
  - Nada importante
- 

Pense sobre as razões pelas quais você não consome banana.

O quanto essa afirmação é importante para você "...o tamanho da porção não é adequado"

- Extremamente importante
  - Muito importante
  - Moderadamente importante
  - Levemente importante
  - Nada importante
- 

Pense sobre as razões pelas quais você não consome banana.

O quanto essa afirmação é importante para você "...não sustenta o suficiente"

- Extremamente importante
  - Muito importante
  - Moderadamente importante
  - Levemente importante
  - Nada importante
- 

Pense sobre as razões pelas quais você não consome banana.

O quanto essa afirmação é importante para você "...não é saudável"

- Extremamente importante
  - Muito importante
  - Moderadamente importante
  - Levemente importante
  - Nada importante
- 

Pense sobre as razões pelas quais você não consome banana.

O quanto essa afirmação é importante para você "...não é conveniente"

- Extremamente importante
  - Muito importante
  - Moderadamente importante
  - Levemente importante
  - Nada importante
- 

Pense sobre as razões pelas quais você não consome banana.

O quanto essa afirmação é importante para você "...eu não quero me dar ao luxo"

- Extremamente importante
- Muito importante
- Moderadamente importante
- Levemente importante
- Nada importante

---

Pense sobre as razões pelas quais você não consome banana.

O quanto essa afirmação é importante para você "...não é apropriado para a situação"

- Extremamente importante
- Muito importante
- Moderadamente importante
- Levemente importante
- Nada importante

---

Pense sobre as razões pelas quais você não consome banana.

O quanto essa afirmação é importante para você "...não é um alimento que eu como perto de outras pessoas"

- Extremamente importante
- Muito importante
- Moderadamente importante
- Levemente importante
- Nada importante

---

Pense sobre as razões pelas quais você não consome banana.

O quanto essa afirmação é importante para você "...o preço está muito alto"

- Extremamente importante
- Muito importante
- Moderadamente importante
- Levemente importante
- Nada importante

---

Pense sobre as razões pelas quais você não consome banana.



O quanto essa afirmação é importante para você "...eu não gosto do jeito que parece"

- Extremamente importante
  - Muito importante
  - Moderadamente importante
  - Levemente importante
  - Nada importante
- 

Pense sobre as razões pelas quais você não consome banana.

O quanto essa afirmação é importante para você "...muito rico em calorias"

- Extremamente importante
  - Muito importante
  - Moderadamente importante
  - Levemente importante
  - Nada importante
- 

Pense sobre as razões pelas quais você não consome banana.

O quanto essa afirmação é importante para você "...eu não devo comer isso"

- Extremamente importante
  - Muito importante
  - Moderadamente importante
  - Levemente importante
  - Nada importante
- 

Pense sobre as razões pelas quais você não consome banana.

O quanto essa afirmação é importante para você "...comer isso me faz parecer antiquado"

- Extremamente importante

- Muito importante
  - Moderadamente importante
  - Levemente importante
  - Nada importante
- 

Pense sobre as razões pelas quais você não consome banana.

O quanto essa afirmação é importante para você "...não é nada que eu queira comer agora"

- Extremamente importante
  - Muito importante
  - Moderadamente importante
  - Levemente importante
  - Nada importante
- 

Pense sobre as razões pelas quais você não consome banana.

O quanto essa afirmação é importante para você "...eu comi recentemente e não quero comer a mesma comida com tanta frequência"

- Extremamente importante
  - Muito importante
  - Moderadamente importante
  - Levemente importante
  - Nada importante
- 

Pense sobre as razões pelas quais você não consome banana.

O quanto essa afirmação é importante para você "...eu nunca escolheria isso porque eu gosto de comer a mesma comida todos os dias"

- Extremamente importante
- Muito importante
- Moderadamente importante

- Levemente importante
  - Nada importante
- 

Pense sobre as razões pelas quais você não consome banana.

O quanto essa afirmação é importante para você "...essa comida me faz sentir triste, solitário e frustrado"

- Extremamente importante
  - Muito importante
  - Moderadamente importante
  - Levemente importante
  - Nada importante
- 

Pense sobre as razões pelas quais você não consome banana.

O quanto essa afirmação é importante para você "...não é orgânico"

- Extremamente importante
  - Muito importante
  - Moderadamente importante
  - Levemente importante
  - Nada importante
- 

## Reasons for Sweet food Choices(Full RATA)

---

Você consome brigadeiro?

- Sim
  - Não
- 

Pense sobre as razões pelas quais você consome brigadeiro.

O quanto essa afirmação é importante para você "...porque estou a acostumado a comer isso"

- Extremamente importante
  - Muito importante
  - Moderadamente importante
  - Levemente importante
  - Nada importante
- 

Pense sobre as razões pelas quais você consome brigadeiro.

O quanto essa afirmação é importante para você "...porque é saudável"

- Extremamente importante
  - Muito importante
  - Moderadamente importante
  - Levemente importante
  - Nada importante
- 

Pense sobre as razões pelas quais você consome brigadeiro.

O quanto essa afirmação é importante para você "...porque é rápido de preparar"

- Extremamente importante
  - Muito importante
  - Moderadamente importante
  - Levemente importante
  - Nada importante
- 

Pense sobre as razões pelas quais você consome brigadeiro.

O quanto essa afirmação é importante para você "...porque é saboroso"

- Extremamente importante
- Muito importante

- Moderadamente importante
  - Levemente importante
  - Nada importante
- 

Pense sobre as razões pelas quais você consome brigadeiro.

O quanto essa afirmação é importante para você "...porque eu me dou ao luxo"

- Extremamente importante
  - Muito importante
  - Moderadamente importante
  - Levemente importante
  - Nada importante
- 

Pense sobre as razões pelas quais você consome brigadeiro.

O quanto essa afirmação é importante para você "...porque é natural (exemplo, não geneticamente modificado)"

- Extremamente importante
  - Muito importante
  - Moderadamente importante
  - Levemente importante
  - Nada importante
- 

Pense sobre as razões pelas quais você consome brigadeiro.

O quanto essa afirmação é importante para você "...porque eu não quero gastar muito"

- Extremamente importante
- Muito importante
- Moderadamente importante
- Levemente importante
- Nada importante

---

Pense sobre as razões pelas quais você consome brigadeiro.

O quanto essa afirmação é importante para você "...porque tem baixas calorias"

- Extremamente importante
  - Muito importante
  - Moderadamente importante
  - Levemente importante
  - Nada importante
- 

Pense sobre as razões pelas quais você consome brigadeiro.

O quanto essa afirmação é importante para você "...porque estou frustrado"

- Extremamente importante
  - Muito importante
  - Moderadamente importante
  - Levemente importante
  - Nada importante
- 

Pense sobre as razões pelas quais você consome brigadeiro.

O quanto essa afirmação é importante para você "...porque me faz parecer melhor na frente dos outros "

- Extremamente importante
  - Muito importante
  - Moderadamente importante
  - Levemente importante
  - Nada importante
- 

Pense sobre as razões pelas quais você consome brigadeiro.

O quanto essa afirmação é importante para você "...porque seria falta de educação não comer "

- Extremamente importante
  - Muito importante
  - Moderadamente importante
  - Levemente importante
  - Nada importante
- 

Pense sobre as razões pelas quais você consome brigadeiro.

O quanto essa afirmação é importante para você "...porque a apresentação é atraente (por exemplo a embalagem)"

- Extremamente importante
  - Muito importante
  - Moderadamente importante
  - Levemente importante
  - Nada importante
- 

Pense sobre as razões pelas quais você consome brigadeiro.

O quanto essa afirmação é importante para você "...porque eu posso desfrutar o momento com outras pessoas"

- Extremamente importante
  - Muito importante
  - Moderadamente importante
  - Levemente importante
  - Nada importante
- 

Pense sobre as razões pelas quais você consome brigadeiro.

O quanto essa afirmação é importante para você "...porque é orgânico"

- Extremamente importante
  - Muito importante
  - Moderadamente importante
  - Levemente importante
  - Nada importante
- 

Pense sobre as razões pelas quais você consome brigadeiro.

O quanto essa afirmação é importante para você "...porque eu cresci comendo isso"

- Extremamente importante
  - Muito importante
  - Moderadamente importante
  - Levemente importante
  - Nada importante
- 

Pense sobre as razões pelas quais você consome brigadeiro.

O quanto essa afirmação é importante para você "...porque eu curto"

- Extremamente importante
  - Muito importante
  - Moderadamente importante
  - Levemente importante
  - Nada importante
- 

Pense sobre as razões pelas quais você consome brigadeiro.

O quanto essa afirmação é importante para você "...porque eu estou faminto"

- Extremamente importante
- Muito importante
- Moderadamente importante
- Levemente importante



Nada importante

---

Pense sobre as razões pelas quais você consome brigadeiro.

O quanto essa afirmação é importante para você "...porque eu tenho o hábito de comer"

- Extremamente importante
  - Muito importante
  - Moderadamente importante
  - Levemente importante
  - Nada importante
- 

Pense sobre as razões pelas quais você consome brigadeiro.

O quanto essa afirmação é importante para você "...porque eu tenho vontade de comer isso"

- Extremamente importante
  - Muito importante
  - Moderadamente importante
  - Levemente importante
  - Nada importante
- 

Pense sobre as razões pelas quais você consome brigadeiro.

O quanto essa afirmação é importante para você "...porque é fácil preparar"

- Extremamente importante
  - Muito importante
  - Moderadamente importante
  - Levemente importante
  - Nada importante
-

Pense sobre as razões pelas quais você consome brigadeiro.

O quanto essa afirmação é importante para você "...porque eu estou triste"

- Extremamente importante
  - Muito importante
  - Moderadamente importante
  - Levemente importante
  - Nada importante
- 

Pense sobre as razões pelas quais você consome brigadeiro.

O quanto essa afirmação é importante para você "...porque tem pouca gordura"

- Extremamente importante
  - Muito importante
  - Moderadamente importante
  - Levemente importante
  - Nada importante
- 

Pense sobre as razões pelas quais você consome brigadeiro.

O quanto essa afirmação é importante para você "...porque eu vi propaganda em algum lugar ou vi na TV"

- Extremamente importante
  - Muito importante
  - Moderadamente importante
  - Levemente importante
  - Nada importante
- 

Pense sobre as razões pelas quais você consome brigadeiro.

O quanto essa afirmação é importante para você "...porque deixa as reuniões sociais mais agradáveis"

- Extremamente importante
  - Muito importante
  - Moderadamente importante
  - Levemente importante
  - Nada importante
- 

Pense sobre as razões pelas quais você consome brigadeiro.

O quanto essa afirmação é importante para você "...porque eu devo comer"

- Extremamente importante
  - Muito importante
  - Moderadamente importante
  - Levemente importante
  - Nada importante
- 

Pense sobre as razões pelas quais você consome brigadeiro.

O quanto essa afirmação é importante para você "...porque os outros gostam"

- Extremamente importante
  - Muito importante
  - Moderadamente importante
  - Levemente importante
  - Nada importante
- 

Pense sobre as razões pelas quais você consome brigadeiro.

O quanto essa afirmação é importante para você "...porque eu me sinto sozinho"

- Extremamente importante
- Muito importante
- Moderadamente importante
- Levemente importante
- Nada importante

---

Pense sobre as razões pelas quais você consome brigadeiro.

O quanto essa afirmação é importante para você "...porque eu controlo meu peso"

- Extremamente importante
  - Muito importante
  - Moderadamente importante
  - Levemente importante
  - Nada importante
- 

Pense sobre as razões pelas quais você consome brigadeiro.

O quanto essa afirmação é importante para você "...porque não contém substâncias perigosas (por exemplo, agrotóxicos, poluentes, antibióticos)"

- Extremamente importante
  - Muito importante
  - Moderadamente importante
  - Levemente importante
  - Nada importante
- 

Pense sobre as razões pelas quais você consome brigadeiro.

O quanto essa afirmação é importante para você "...porque é mais conveniente"

- Extremamente importante
  - Muito importante
  - Moderadamente importante
  - Levemente importante
  - Nada importante
- 

Pense sobre as razões pelas quais você consome brigadeiro.

O quanto essa afirmação é importante para você "...porque eu preciso de energia"

- Extremamente importante
  - Muito importante
  - Moderadamente importante
  - Levemente importante
  - Nada importante
- 

Pense sobre as razões pelas quais você consome brigadeiro.

O quanto essa afirmação é importante para você "...porque me é familiar"

- Extremamente importante
  - Muito importante
  - Moderadamente importante
  - Levemente importante
  - Nada importante
- 

Pense sobre as razões pelas quais você consome brigadeiro.

O quanto essa afirmação é importante para você "...porque eu gosto"

- Extremamente importante
  - Muito importante
  - Moderadamente importante
  - Levemente importante
  - Nada importante
- 

Pense sobre as razões pelas quais você consome brigadeiro.

O quanto essa afirmação é importante para você "...porque me sacia de forma agradável"

- Extremamente importante
- Muito importante
- Moderadamente importante
- Levemente importante

Nada importante

---

Pense sobre as razões pelas quais você consome brigadeiro.

O quanto essa afirmação é importante para você "...para compensar"

- Extremamente importante
  - Muito importante
  - Moderadamente importante
  - Levemente importante
  - Nada importante
- 

Pense sobre as razões pelas quais você consome brigadeiro.

O quanto essa afirmação é importante para você "...porque não faz parte das tradições como Natal, Ano Novo e ocasiões especiais"

- Extremamente importante
  - Muito importante
  - Moderadamente importante
  - Levemente importante
  - Nada importante
- 

Pense sobre as razões pelas quais você consome brigadeiro.

O quanto essa afirmação é importante para você "...porque faz parte de certas situações"

- Extremamente importante
  - Muito importante
  - Moderadamente importante
  - Levemente importante
  - Nada importante
-

Pense sobre as razões pelas quais você consome brigadeiro.

O quanto essa afirmação é importante para você "...para manter uma dieta balanceada"

- Extremamente importante
  - Muito importante
  - Moderadamente importante
  - Levemente importante
  - Nada importante
- 

Pense sobre as razões pelas quais você consome brigadeiro.

O quanto essa afirmação é importante para você "...porque é sociável"

- Extremamente importante
  - Muito importante
  - Moderadamente importante
  - Levemente importante
  - Nada importante
- 

Pense sobre as razões pelas quais você consome brigadeiro.

O quanto essa afirmação é importante para você "...porque não é caro"

- Extremamente importante
  - Muito importante
  - Moderadamente importante
  - Levemente importante
  - Nada importante
- 

Pense sobre as razões pelas quais você consome brigadeiro.

O quanto essa afirmação é importante para você "...porque me atraiu aparentemente (por exemplo, cores atraentes)"

- Extremamente importante
  - Muito importante
  - Moderadamente importante
  - Levemente importante
  - Nada importante
- 

Pense sobre as razões pelas quais você consome brigadeiro.

O quanto essa afirmação é importante para você "...para não desapontar alguém que está tentando me agradar"

- Extremamente importante
  - Muito importante
  - Moderadamente importante
  - Levemente importante
  - Nada importante
- 

Pense sobre as razões pelas quais você consome brigadeiro.

O quanto essa afirmação é importante para você "...porque é moda"

- Extremamente importante
  - Muito importante
  - Moderadamente importante
  - Levemente importante
  - Nada importante
- 

Pense sobre as razões pelas quais você consome brigadeiro.

O quanto essa afirmação é importante para você "...porque está em promoção"

- Extremamente importante
- Muito importante
- Moderadamente importante
- Levemente importante



Nada importante

---

Pense sobre as razões pelas quais você consome brigadeiro.

O quanto essa afirmação é importante para você "...porque me mantém em forma (por exemplo, vigoroso, dinâmico)"

- Extremamente importante
  - Muito importante
  - Moderadamente importante
  - Levemente importante
  - Nada importante
- 

Pense sobre as razões pelas quais você consome brigadeiro.

O quanto essa afirmação é importante para você "...porque é a única escolha"

- Extremamente importante
  - Muito importante
  - Moderadamente importante
  - Levemente importante
  - Nada importante
- 

Pense sobre as razões pelas quais você consome brigadeiro.

O quanto essa afirmação é importante para você "...porque eu quero comer todos os dias"

- Extremamente importante
  - Muito importante
  - Moderadamente importante
  - Levemente importante
  - Nada importante
-

Pense sobre as razões pelas quais você não consome brigadeiro.

O quanto essa afirmação é importante para você "...eu não acho que seja um lanche"

- Extremamente importante
  - Muito importante
  - Moderadamente importante
  - Levemente importante
  - Nada importante
- 

Pense sobre as razões pelas quais você não consome brigadeiro.

O quanto essa afirmação é importante para você "...eu não gosto disso"

- Extremamente importante
  - Muito importante
  - Moderadamente importante
  - Levemente importante
  - Nada importante
- 

Pense sobre as razões pelas quais você não consome brigadeiro.

O quanto essa afirmação é importante para você "...normalmente eu não como isso"

- Extremamente importante
  - Muito importante
  - Moderadamente importante
  - Levemente importante
  - Nada importante
- 

Pense sobre as razões pelas quais você não consome brigadeiro.

O quanto essa afirmação é importante para você "...o tamanho da porção não é adequado"

- Extremamente importante
  - Muito importante
  - Moderadamente importante
  - Levemente importante
  - Nada importante
- 

Pense sobre as razões pelas quais você não consome brigadeiro.

O quanto essa afirmação é importante para você "...não sustenta o suficiente"

- Extremamente importante
  - Muito importante
  - Moderadamente importante
  - Levemente importante
  - Nada importante
- 

Pense sobre as razões pelas quais você não consome brigadeiro.

O quanto essa afirmação é importante para você "...não é saudável"

- Extremamente importante
  - Muito importante
  - Moderadamente importante
  - Levemente importante
  - Nada importante
- 

Pense sobre as razões pelas quais você não consome brigadeiro.

O quanto essa afirmação é importante para você "...não é conveniente"

- Extremamente importante
- Muito importante

- Moderadamente importante
  - Levemente importante
  - Nada importante
- 

Pense sobre as razões pelas quais você não consome brigadeiro.

O quanto essa afirmação é importante para você "...eu não quero me dar ao luxo"

- Extremamente importante
  - Muito importante
  - Moderadamente importante
  - Levemente importante
  - Nada importante
- 

Pense sobre as razões pelas quais você não consome brigadeiro.

O quanto essa afirmação é importante para você "...não é apropriado para a situação"

- Extremamente importante
  - Muito importante
  - Moderadamente importante
  - Levemente importante
  - Nada importante
- 

Pense sobre as razões pelas quais você não consome brigadeiro.

O quanto essa afirmação é importante para você "...não é um alimento que eu como perto de outras pessoas"

- Extremamente importante
- Muito importante
- Moderadamente importante
- Levemente importante
- Nada importante

---

Pense sobre as razões pelas quais você não consome brigadeiro.

O quanto essa afirmação é importante para você "...o preço está muito alto"

- Extremamente importante
  - Muito importante
  - Moderadamente importante
  - Levemente importante
  - Nada importante
- 

Pense sobre as razões pelas quais você não consome brigadeiro.

O quanto essa afirmação é importante para você "...eu não gosto do jeito que parece"

- Extremamente importante
  - Muito importante
  - Moderadamente importante
  - Levemente importante
  - Nada importante
- 

Pense sobre as razões pelas quais você não consome brigadeiro.

O quanto essa afirmação é importante para você "...muito rico em calorias"

- Extremamente importante
  - Muito importante
  - Moderadamente importante
  - Levemente importante
  - Nada importante
- 

Pense sobre as razões pelas quais você não consome brigadeiro.

O quanto essa afirmação é importante para você "...eu não devo comer isso"

- Extremamente importante
  - Muito importante
  - Moderadamente importante
  - Levemente importante
  - Nada importante
- 

Pense sobre as razões pelas quais você não consome brigadeiro.

O quanto essa afirmação é importante para você "...comer isso me faz parecer antiquado"

- Extremamente importante
  - Muito importante
  - Moderadamente importante
  - Levemente importante
  - Nada importante
- 

Pense sobre as razões pelas quais você não consome brigadeiro.

O quanto essa afirmação é importante para você "...não é nada que eu queira comer agora"

- Extremamente importante
  - Muito importante
  - Moderadamente importante
  - Levemente importante
  - Nada importante
- 

Pense sobre as razões pelas quais você não consome brigadeiro.

O quanto essa afirmação é importante para você "...eu comi recentemente e não quero comer a mesma comida com tanta frequência"

- Extremamente importante
- Muito importante

- Moderadamente importante
  - Levemente importante
  - Nada importante
- 

Pense sobre as razões pelas quais você não consome brigadeiro.

O quanto essa afirmação é importante para você "...eu nunca escolheria isso porque eu gosto de comer a mesma comida todos os dias"

- Extremamente importante
  - Muito importante
  - Moderadamente importante
  - Levemente importante
  - Nada importante
- 

Pense sobre as razões pelas quais você não consome brigadeiro.

O quanto essa afirmação é importante para você "...essa comida me faz sentir triste, solitário e frustrado"

- Extremamente importante
  - Muito importante
  - Moderadamente importante
  - Levemente importante
  - Nada importante
- 

Pense sobre as razões pelas quais você não consome brigadeiro.

O quanto essa afirmação é importante para você "...não é orgânico"

- Extremamente importante
- Muito importante
- Moderadamente importante
- Levemente importante
- Nada importante

Powered by Qualtrics
